# Supplementary material
Source: PubMed Central journal article supplement (PMC4225648)

# Supporting Information

**Enantiospecific Synthesis and Biological Investigations of a Nuphar Alkaloid:**

**Proposed Structure of a Castoreum Component**

Hajime Seki and Gunda I. Georg\*

Department of Chemistry and Department of Medicinal Chemistry, Institute for Therapeutics

Discovery and Development, College of Pharmacy, University of Minnesota, 717 Delaware

Street SE, Minneapolis, MN 55414 United States

## Table of Contents

|                                                                                                               |           |
|---------------------------------------------------------------------------------------------------------------|-----------|
| <b>1. Comparison of <math>^1\text{H}</math> and <math>^{13}\text{C}</math>-NMR data from prior work .....</b> | <b>2</b>  |
| <b>2. <math>^1\text{H}</math> and <math>^{13}\text{C}</math> NMR spectra</b>                                  |           |
| <b>3.1 Compound 5.....</b>                                                                                    | <b>6</b>  |
| <b>3.2 Compound 6.....</b>                                                                                    | <b>8</b>  |
| <b>3.3 Compound 7.....</b>                                                                                    | <b>10</b> |
| <b>3.4 Compound 8.....</b>                                                                                    | <b>12</b> |
| <b>3.5 Compound 9.....</b>                                                                                    | <b>14</b> |
| <b>3.6 Compound 10a.....</b>                                                                                  | <b>16</b> |
| <b>3.7 Compound 10b.....</b>                                                                                  | <b>18</b> |
| <b>3.8 Compound 1.....</b>                                                                                    | <b>20</b> |
| <b>3.9 Compound 2.....</b>                                                                                    | <b>22</b> |
| <b>3.10 Compound 11.....</b>                                                                                  | <b>24</b> |
| <b>3.11 Compound 1•HCl.....</b>                                                                               | <b>26</b> |
| <b>3. GC/MS for compounds 1 and 2.....</b>                                                                    | <b>28</b> |

## 1. Comparison of $^1\text{H}$ and $^{13}\text{C}$ -NMR data from prior work

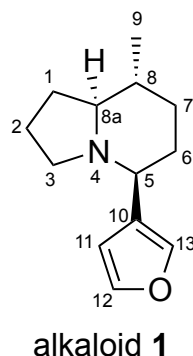

$^1\text{H}$  and  $^{13}\text{C}$  NMR data of alkaloid **1** was summarized in the table below.

- $^1\text{H}$  NMR data of Georg, Kunz, and Barluenga are similar to each other.
- $^{13}\text{C}$  NMR data of Georg, Kunz, Barluenga, LaLonde are similar to each other.
- Although Davis reports that their data of alkaloid **1** is identical with Barluenga's, we found that the  $^1\text{H}$  NMR spectrum provided to us by Barluenga's lab was quite different from the Davis  $^1\text{H}$  NMR, especially in the  $\sim 3.0$  ppm region. Davis' spectrum of **1** seems not calibrated, which made it difficult for us to further decipher the spectrum.
- In Davis' paper (*JOC*, **2006**, *71*, 4222), although the spectroscopic data of the intermediate #16 was identical to Barluenga's report (intermediate #10), we found that the two spectra were somewhat different. This led us to the speculation that they might have produced the stereochemical isomer of the alkaloid. The comparison of spectroscopic data of the intermediate **11** further supported this hypothesis (see below).
- We synthesized the HCl salt of alkaloid **1** and examined its spectra, which was different from any of the reported spectra including the one by Davis'.

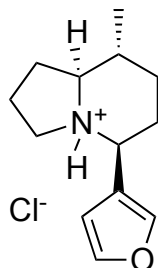

**1**•HCl.  $^1\text{H}$  NMR (400 MHz,  $\text{CDCl}_3$ )  $\delta$  12.29 (bs, 1H), 7.68 (s, 1H), 7.41 (s, 1H), 7.09 (d,  $J = 1.4$  Hz, 1H), 3.67 (t,  $J = 9.8$  Hz, 1H), 3.44 (s, 1H), 2.75 – 2.47 (m, 4H), 2.26 (m, 3H), 2.05 (dd,  $J = 13.6, 2.8$  Hz, 1H), 1.94 (m, 2H), 1.35 – 1.21 (m, 1H), 1.02 (d,  $J = 6.4$  Hz, 3H);  $^{13}\text{C}$  NMR (100 MHz,  $\text{CDCl}_3$ )  $\delta$  144.3, 141.6, 121.1, 110.5, 73.9, 61.6, 51.9, 33.0, 32.9, 31.5, 27.5, 19.2, 18.6.

| alkaloid1 | Georg                  |                | Kunz                   |                | Barluenga                           |                |
|-----------|------------------------|----------------|------------------------|----------------|-------------------------------------|----------------|
|           | Atom #                 | <sup>1</sup> H | <sup>13</sup> C        | <sup>1</sup> H | <sup>13</sup> C                     | <sup>1</sup> H |
| 1 (2H)    | 2.0-1.85<br>1.52-1.45  | 29.2           | 2.01-1.90<br>1.54-1.36 | 29             | 1.98-1.87<br>M                      | 28.9           |
| 2 (2H)    | 1.76-1.50              | 20.3           | 1.68-1.55              | 20             | M                                   | 20             |
| 3 (2H)    | 2.95-2.84<br>2.0-1.85  | 53.3           | 2.99-2.78<br>2.01-1.90 | 53.1           | 2.88 (td, 8.8, 2.2 Hz)<br>1.98-1.87 | 53.1           |
| 4         | -                      | -              | -                      | -              | -                                   | -              |
| 5         | 2.95-2.84              | 59.9           | 2.99-2.78              | 59.8           | 2.91 (dd, 8.4, 5.7Hz)               | 59.7           |
| 6         | 1.82-1.70              | 34.3           | 1.84-1.70              | 34             | M                                   | 34             |
| 7 (2H)    | 1.18-1.01<br>1.82-1.70 | 34.1           | 1.14-1.01<br>1.84-1.70 | 33.8           | 1.13-1.02<br>M                      | 33.8           |
| 8         | 1.50-1.35              | 36.6           | 1.54-1.36              | 36.3           | M                                   | 36.2           |
| 8a        | 1.68-1.51              | 71.6           | 1.68-1.55              | 71.5           | M                                   | 71.4           |
| 9         | 0.91 (d, 6.5 Hz)       | 19             | 0.91 (d, 6.5 Hz)       | 18.8           | 0.90 (d, 6.6 Hz)                    | 18.8           |
| 10        | -                      | 128.4          | -                      | 128            | -                                   | 128            |
| 11        | 6.44                   | 109.9          | 6.47                   | 109.7          | 6.44                                | 109.6          |
| 12        | 7.34                   | 139.5          | 7.35                   | 139.4          | 7.33-7.26                           | 139.3          |
| 13        | 7.34                   | 142.8          | 7.35                   | 142.8          | 7.33-7.26                           | 142.6          |

M = 1.82-1.39, 8H

| alkaloid1 | Davis*                     |                | LaLonde                |                | Tufariello                                                                                                              | Bates                                         |       |      |
|-----------|----------------------------|----------------|------------------------|----------------|-------------------------------------------------------------------------------------------------------------------------|-----------------------------------------------|-------|------|
|           | Atom #                     | <sup>1</sup> H | <sup>13</sup> C        | <sup>1</sup> H | <sup>13</sup> C                                                                                                         | <sup>1</sup> H/ <sup>13</sup> C               |       |      |
| 1 (2H)    | 1.98<br>N                  | Not provided.  | Not provided.          | -              | Not provided.<br>"confirmed by comparison of the H and C NMR spectra of <b>1</b> synthesized independently by LaLonde." | Not provided.<br>Referred to Barluenga's data |       |      |
| 2 (2H)    | N                          |                |                        |                |                                                                                                                         |                                               | 29.2  | 20.2 |
| 3 (2H)    | 2.88 (td, 8.8, 2.2Hz)<br>N |                |                        |                |                                                                                                                         |                                               | 53.3  | 53.3 |
| 4         | -                          |                | -                      | -              |                                                                                                                         |                                               |       |      |
| 5         | 2.90 (dd, 8.4, 5.7Hz)      |                | 3.52 (dd, 8.0, 6.0 Hz) | 60             |                                                                                                                         |                                               | 34.4  |      |
| 6         | N                          |                | 34.1                   | 34.1           |                                                                                                                         |                                               |       |      |
| 7 (2H)    | 1.13<br>N                  |                | 36.5                   | 36.5           |                                                                                                                         |                                               |       |      |
| 8         | N                          |                | 71.6                   | 71.6           |                                                                                                                         |                                               |       |      |
| 8a        | N                          |                | 18.2                   | 18.2           |                                                                                                                         |                                               |       |      |
| 9         | 0.90 (d, 6.6Hz)            |                | 0.89 (d, 6 Hz)         | 18.2           |                                                                                                                         |                                               | 18.2  |      |
| 10        | -                          |                | -                      | -              |                                                                                                                         |                                               | -     |      |
| 11        | 6.42                       |                | 6.45                   | -              |                                                                                                                         |                                               | -     |      |
| 12        | 7.38                       |                | 7.36                   | 139.7          |                                                                                                                         |                                               | 139.7 |      |
| 13        | 7.38                       | 7.36           | 143.1                  | 143.1          |                                                                                                                         |                                               |       |      |

N = 1.39, 8H

\*actual spectrum looks different from data here

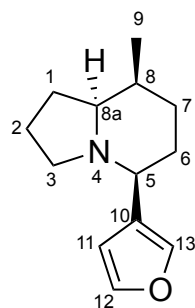

alkaloid 2

| Alkaloid<br>2 | Georg <sup>1</sup>        |                 | Kunz                   |                 | Ban            |                  |         |
|---------------|---------------------------|-----------------|------------------------|-----------------|----------------|------------------|---------|
|               | <sup>1</sup> H            | <sup>13</sup> C | <sup>1</sup> H         | <sup>13</sup> C | <sup>1</sup> H | <sup>13</sup> C  |         |
| Atom #        |                           |                 |                        |                 |                |                  |         |
| 1 (2H)        | 1.70-1.58                 | 27 or<br>32.3   | M                      | 32.1            | Not provided.  | Not<br>provided. |         |
| 2 (2H)        | 1.72-1.52                 | 20.3            | M                      | 20.1            |                |                  |         |
| 3 (2H)        | 2.90-2.83<br>1.87-1.75    | 53.6            | 2.91-2.82<br>1.88-1.75 | 53.4            |                |                  | 3.1-2.7 |
| 4             | -                         | -               | -                      | -               | -              |                  |         |
| 5             | 2.90-2.83                 | 61.1            | 2.91-2.82              | 60.9            | 3.1-2.7        |                  |         |
| 6 (2H)        | 1.52-1.45<br>1.87-1.75    | 29.1            | 1.52-1.45<br>1.88-1.75 | 28.9            | Not provided.  |                  |         |
| 7 (2H)        | 1.72-1.52                 | 27 or<br>32.3   | M                      | 26.8            |                |                  |         |
| 8             | 1.93 (td, 6.8, 2.8<br>Hz) | 29.6            | 1.97-1.89              | 29.4            |                |                  |         |
| 8a            | 2.14-2.06                 | 67.7            | 2.15-2.06              | 67.5            |                |                  |         |
| 9 (3H)        | 1.04 (d, 7.0 Hz)          | 12.4            | 1.04 (d, 7.0 Hz)       | 12.2            | 0.91 (d, 6 Hz) |                  |         |
| 10            | -                         | 129             | -                      | 128.7           | -              |                  |         |
| 11            | 6.43                      | 109             | 6.43                   | 109.7           | 6.46           |                  |         |
| 12            | 7.36-7.30                 | 139.2           | 7.35-7.31              | 139.1           | 7.36-7.35      |                  |         |
| 13            | 7.36-7.30                 | 142.7           | 7.35-7.31              | 142.6           | 7.36-7.36      |                  |         |

M=1.71-1.53, 6H

1. Our data match with ones by Kunz. However, we unable to decide on the assignments for the <sup>13</sup>C signals for atoms 1 and 7 (red).

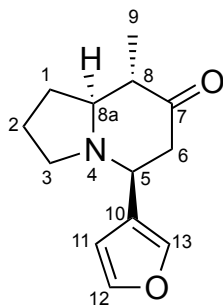

intermediate **11**

| Atom # | Georg (solid) <sup>1</sup> |                 | Tufariello                 |                  | Davis (liquid) <sup>2</sup>                                                                                                              |                                                                                                                       |
|--------|----------------------------|-----------------|----------------------------|------------------|------------------------------------------------------------------------------------------------------------------------------------------|-----------------------------------------------------------------------------------------------------------------------|
|        | <sup>1</sup> H             | <sup>13</sup> C | <sup>1</sup> H             | <sup>13</sup> C  | <sup>1</sup> H                                                                                                                           | <sup>13</sup> C                                                                                                       |
| 1 (2H) | 2.09-1.97<br>1.79-1.58     | 30.5            |                            |                  |                                                                                                                                          |                                                                                                                       |
| 2 (2H) | 1.92-1.79<br>1.79-1.58     | 21.5            | Not provided.              |                  |                                                                                                                                          |                                                                                                                       |
| 3 (2H) | 2.94 (dd, 12.4,<br>5.4 Hz) | 52.2            |                            |                  |                                                                                                                                          |                                                                                                                       |
| 4      | 2.09-1.97                  |                 |                            |                  |                                                                                                                                          |                                                                                                                       |
| 5      | 3.34 (dd, 11.9,<br>3.2Hz)  | 58.1            | 3.30 (dd,<br>11.5, 3.6 Hz) | Not<br>provided. | 1.04 (d,<br>6.3Hz), 1.48,<br>1.70, 1.91(2H),<br>2.38 (3H), 2.42<br>(q, 8.2Hz),<br>3.26, 3.68,<br>3.81, 6.42,<br>7.22, 7.38 (d,<br>7.2Hz) | 10.5,<br>21.9,<br>30.6,<br>45.4,<br>49.7,<br>50.6,<br>52.4,<br>59.4,<br>110.3,<br>121.5,<br>140.7,<br>143.0,<br>211.3 |
| 6 (2H) | 2.76-2.65<br>2.50-2.39     | 48.6            |                            |                  |                                                                                                                                          |                                                                                                                       |
| 7      | -                          | 209.8           |                            |                  |                                                                                                                                          |                                                                                                                       |
| 8      | 2.50-2.39                  | 50.5            | Not provided.              |                  |                                                                                                                                          |                                                                                                                       |
| 8a     | 2.09-1.97                  | 70.5            |                            |                  |                                                                                                                                          |                                                                                                                       |
| 9      | 1.04 (d, 6.6 Hz)           | 10.7            | 1.03 (d, 6.6<br>Hz)        |                  |                                                                                                                                          |                                                                                                                       |
| 10     | -                          | 126.8           |                            |                  |                                                                                                                                          |                                                                                                                       |
| 11     | 6.47                       | 109.1           | Not provided.              |                  |                                                                                                                                          |                                                                                                                       |
| 12     | 7.42-7.31                  | 143.6           |                            |                  |                                                                                                                                          |                                                                                                                       |
| 13     | 7.42-7.32                  | 139.6           |                            |                  |                                                                                                                                          |                                                                                                                       |

1. We confirmed the structure of **11** by X-ray.

2. The chemical shifts are noted in order from upfield to downfield region since it was not possible to make assignments of each H and C peak. This spectroscopic data clearly differs from ours.

110203  
110203HS-VI Nuphar1

$^1\text{H NMR}$  (400 MHz,  $\text{CDCl}_3$ )  $\delta$  7.26 (s, 1H, form-d), 4.14 (ddd,  $J = 11.2, 7.4, 3.5$  Hz, 1H), 3.33 (dt,  $J = 10.2, 5.6$  Hz, 2H), 3.00 (s, 1H), 2.41 (dd,  $J = 15.8, 9.4$  Hz, 1H), 2.13 (d,  $J = 3.1$  Hz, 3H), 2.10 – 2.01 (m, 1H), 1.85 – 1.74 (m, 2H), 1.68 – 1.60 (m, 1H), 1.46 (s, 9H).

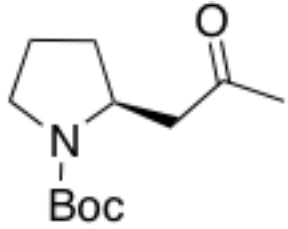

5

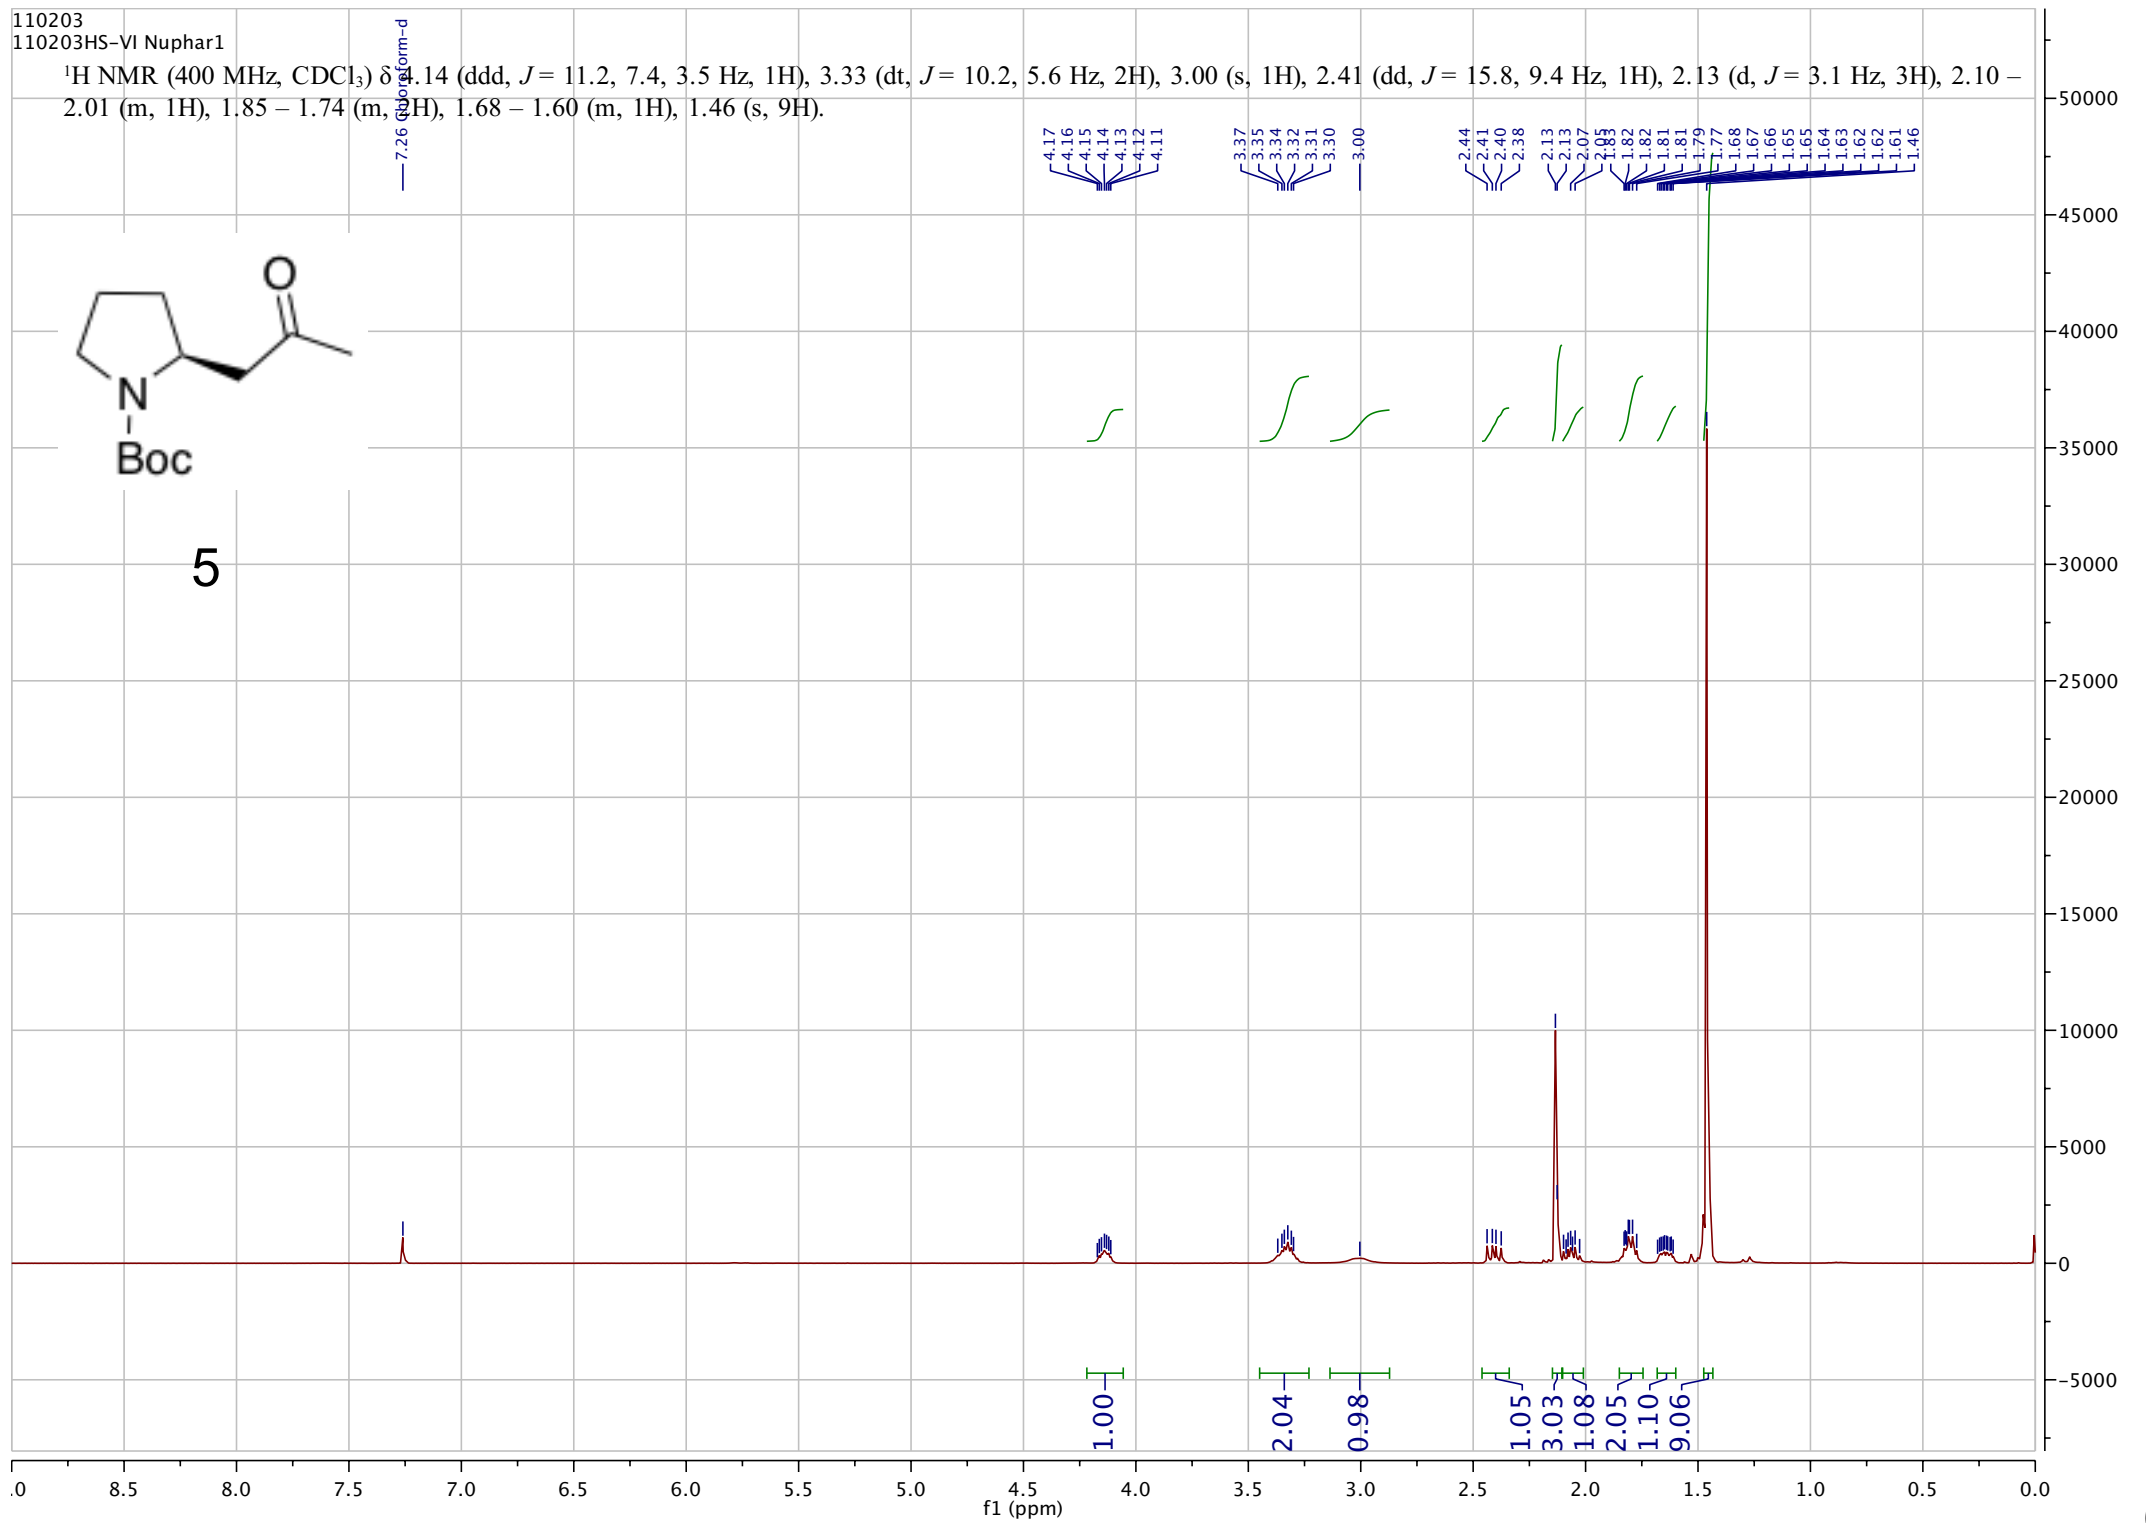

110203  
110203HS-VI Nuphar1

$^{13}\text{C}$  NMR (101 MHz,  $\text{CDCl}_3$ )  $\delta$  207.05, 154.54, 79.57, 77.16, 53.84, 48.57, 46.58, 31.47, 30.46, 28.74, 23.49.

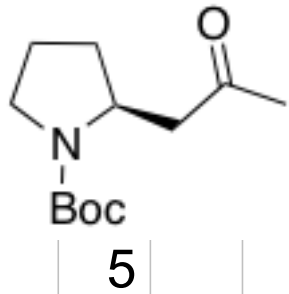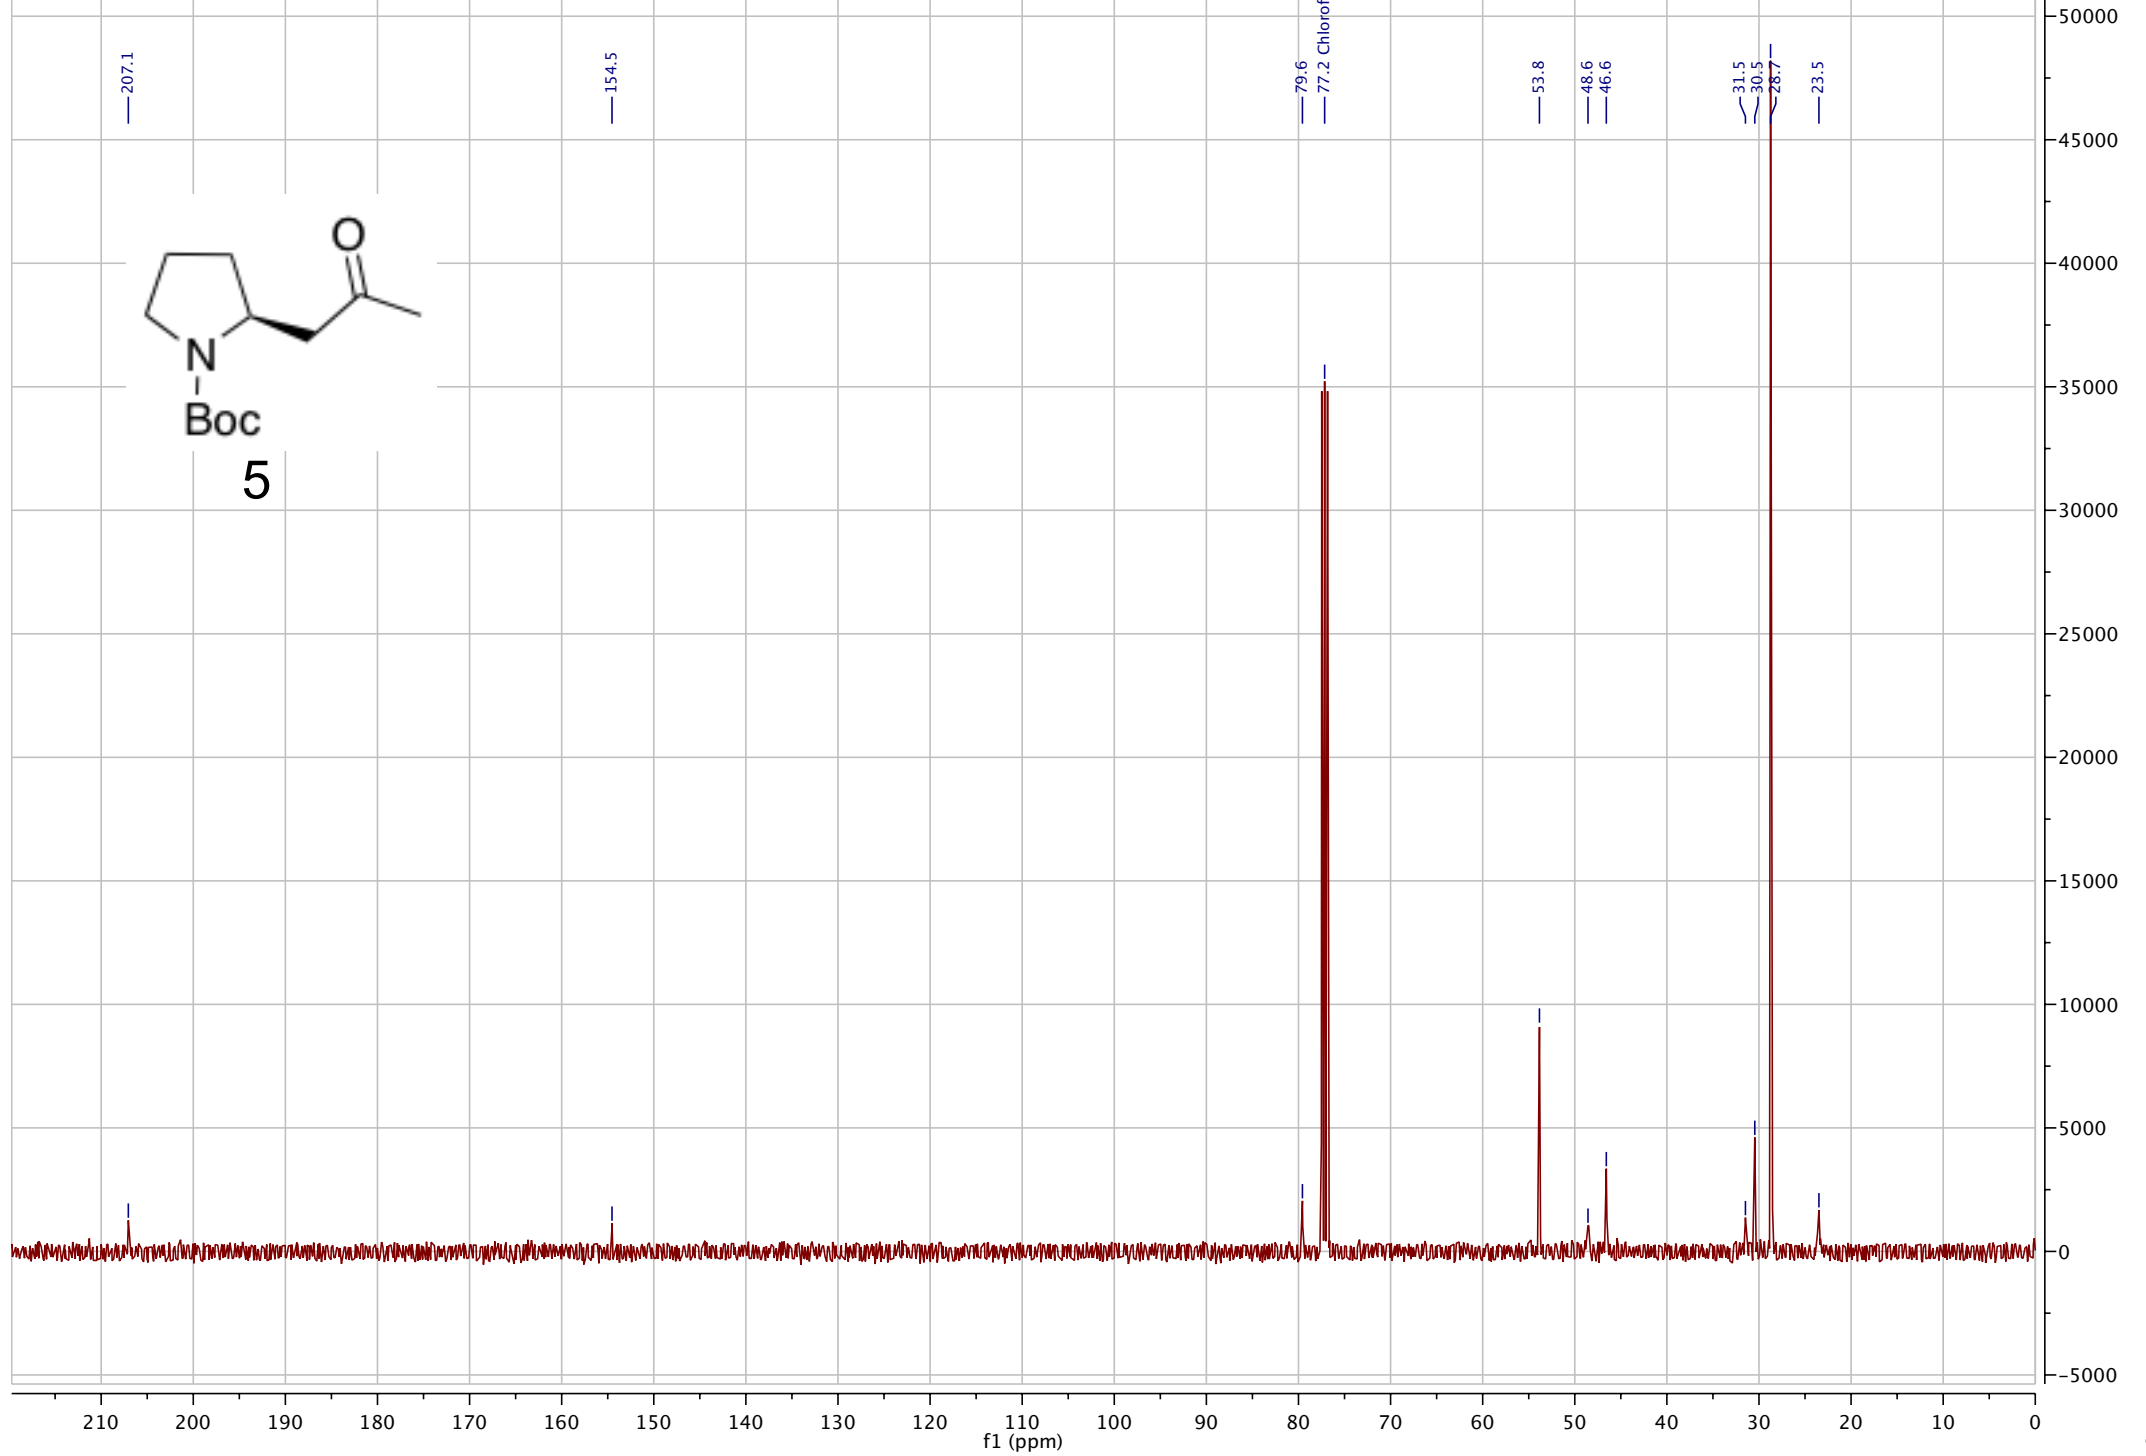

110203  
110203HS-VI Nuphar2

7.39  
7.37  
7.37

6.38

6.16

5.15

4.18

3.40  
3.38  
3.36  
3.34  
3.32

2.98  
2.95  
2.94  
2.88  
2.82  
2.81

2.47  
2.45  
2.43

2.11  
2.09  
2.08

1.85  
1.81  
1.68  
1.67  
1.65

1.64  
1.63  
1.61  
1.50  
1.46  
1.46  
1.46  
1.44

$^1\text{H NMR}$  (400 MHz,  $\text{CDCl}_3$ )  $\delta$  7.38 (dd,  $J = 9.0, 1.1$  Hz, 2H), 6.38 (s, 1H), 5.15 (s, 1H), 4.18 (s, 1H), 3.69 – 3.05 (m, 3H), 3.03 – 2.72 (m, 3H), 2.46 (dd,  $J = 15.6, 8.3$  Hz, 1H), 2.08 (dq,  $J = 15.9, 8.0$  Hz, 1H), 1.82 (d,  $J = 5.3$  Hz, 2H), 1.65 (m, 1H), 1.45 (m, 9H).

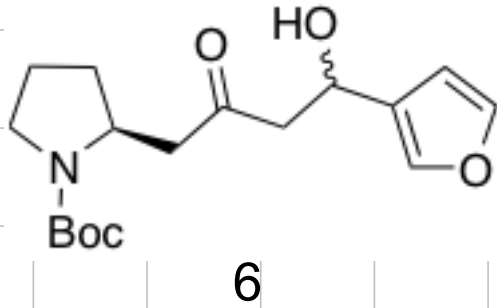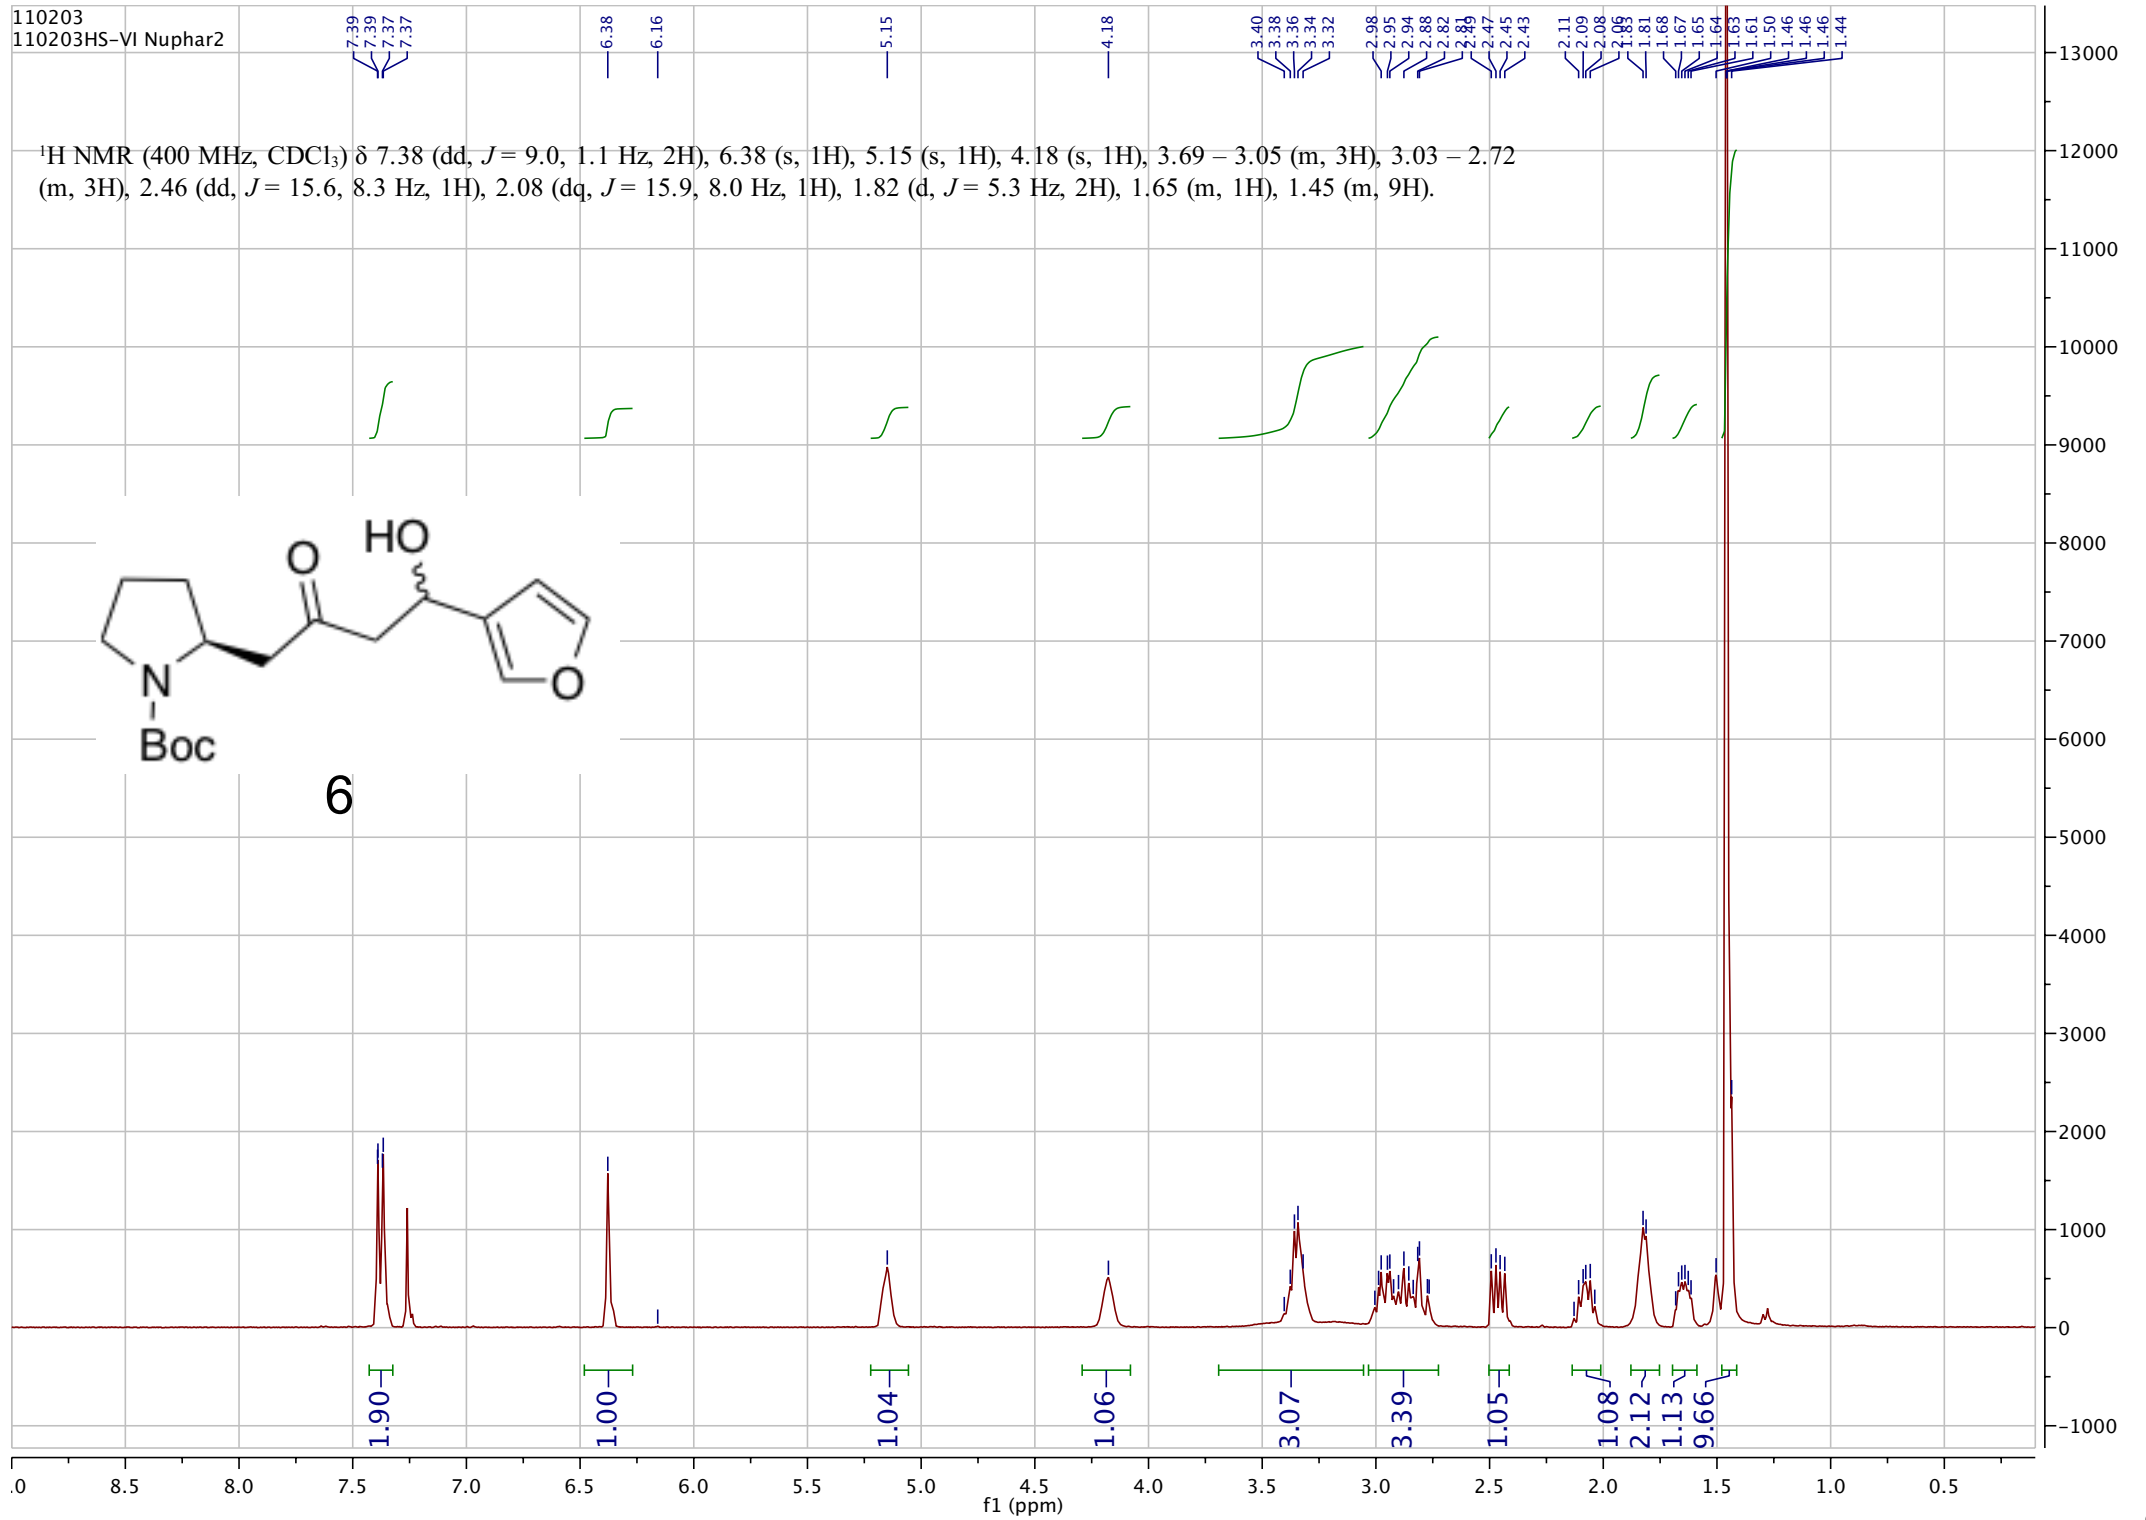



110203  
110203HS-VI Nuphar2

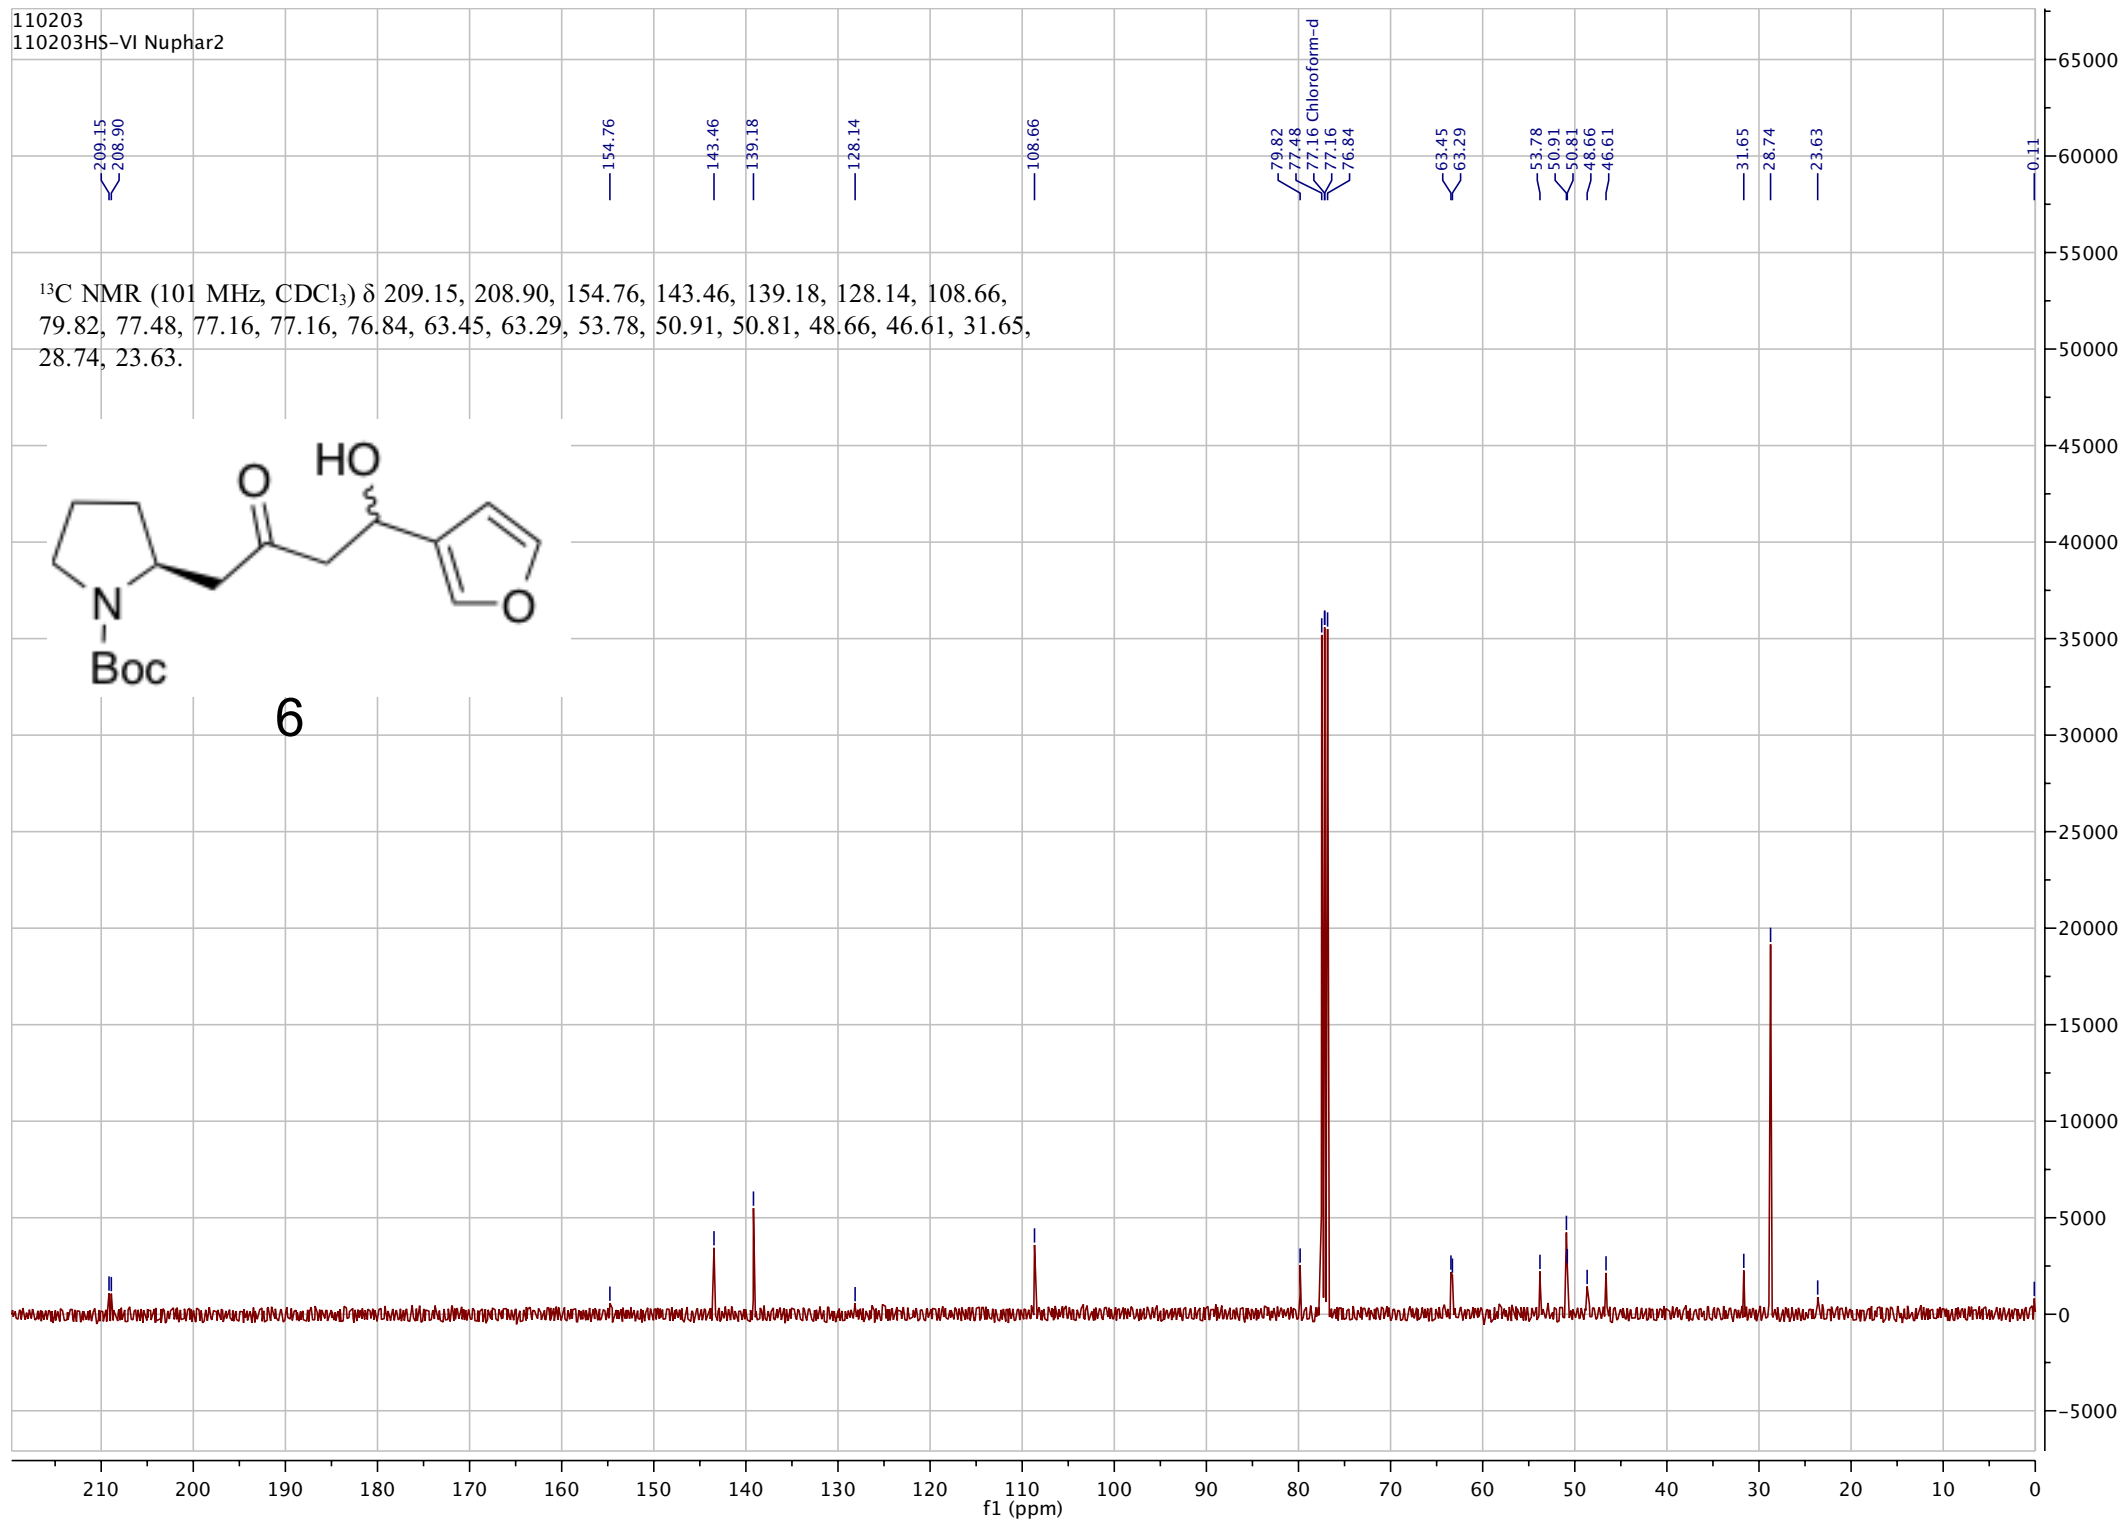

110203  
110203HS-VI Nuphar3

$^1\text{H}$  NMR (400 MHz, MeOD)  $\delta$  8.23 (s, 1H), 7.61 (s, 1H), 6.81 (s, 1H), 6.07 (d,  $J = 14.5$  Hz, 1H), 4.19 (s, 1H), 3.34 (d,  $J = 16.0$  Hz, 3H), 2.83 (m, 1H), 2.41 (s, 1H), 1.95 (m, 4H), 1.46 (s, 9H).

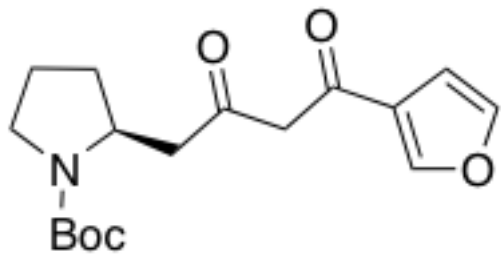

7

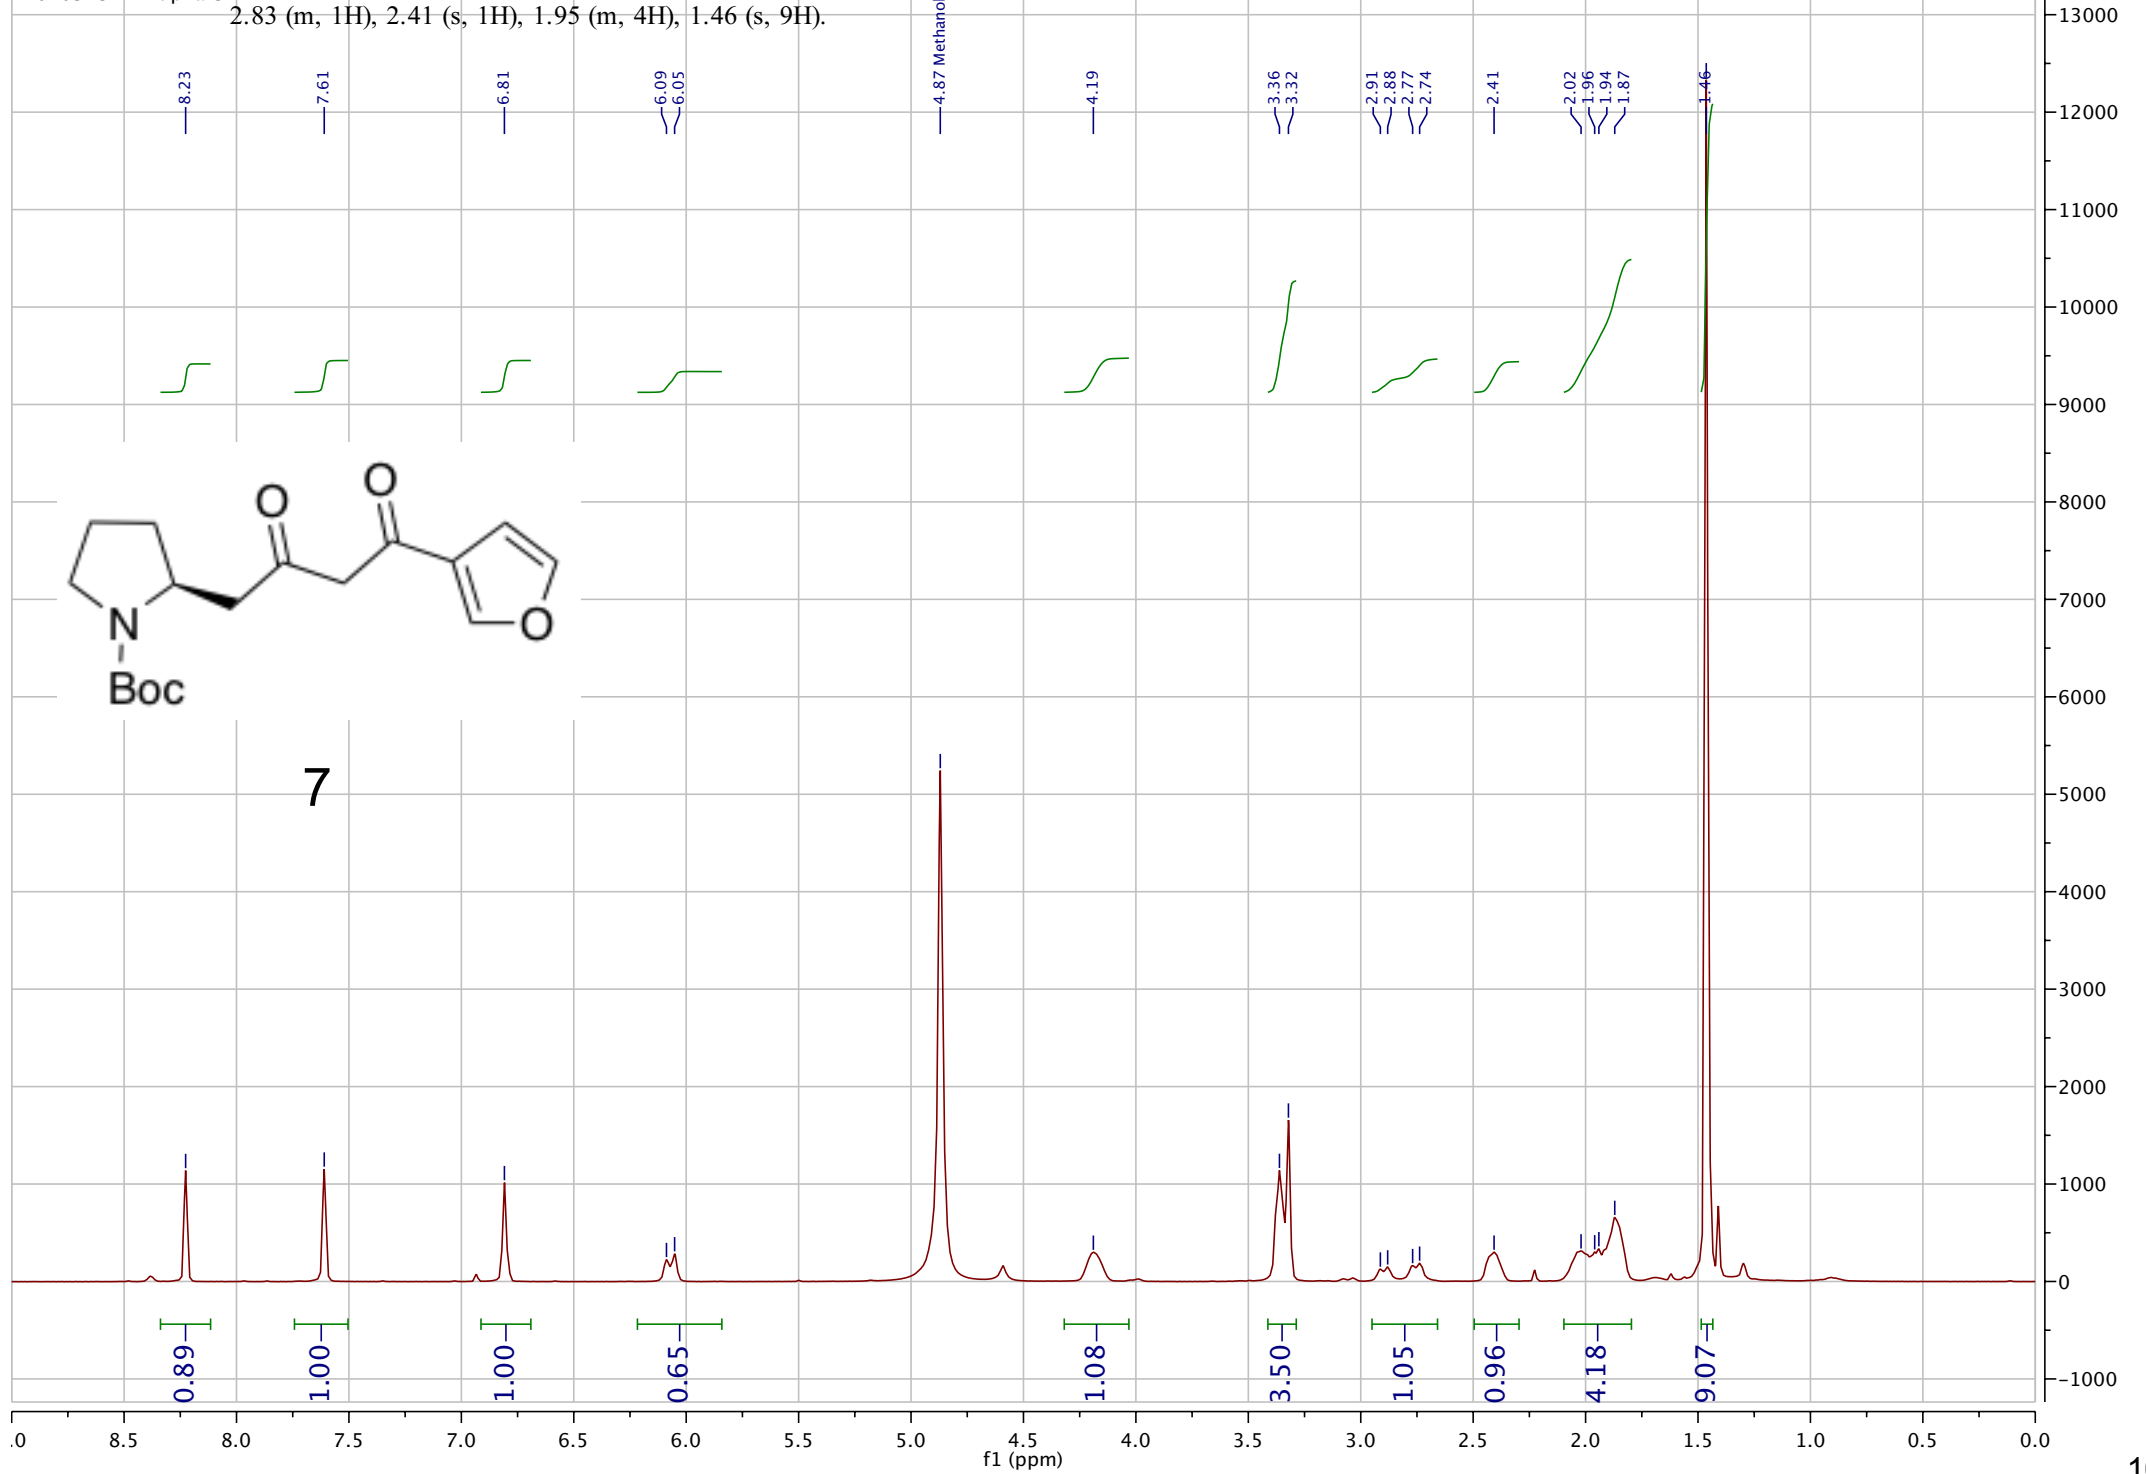

110203  
110203HS-VI Nuphar3

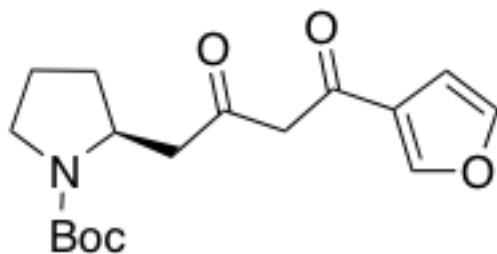

7

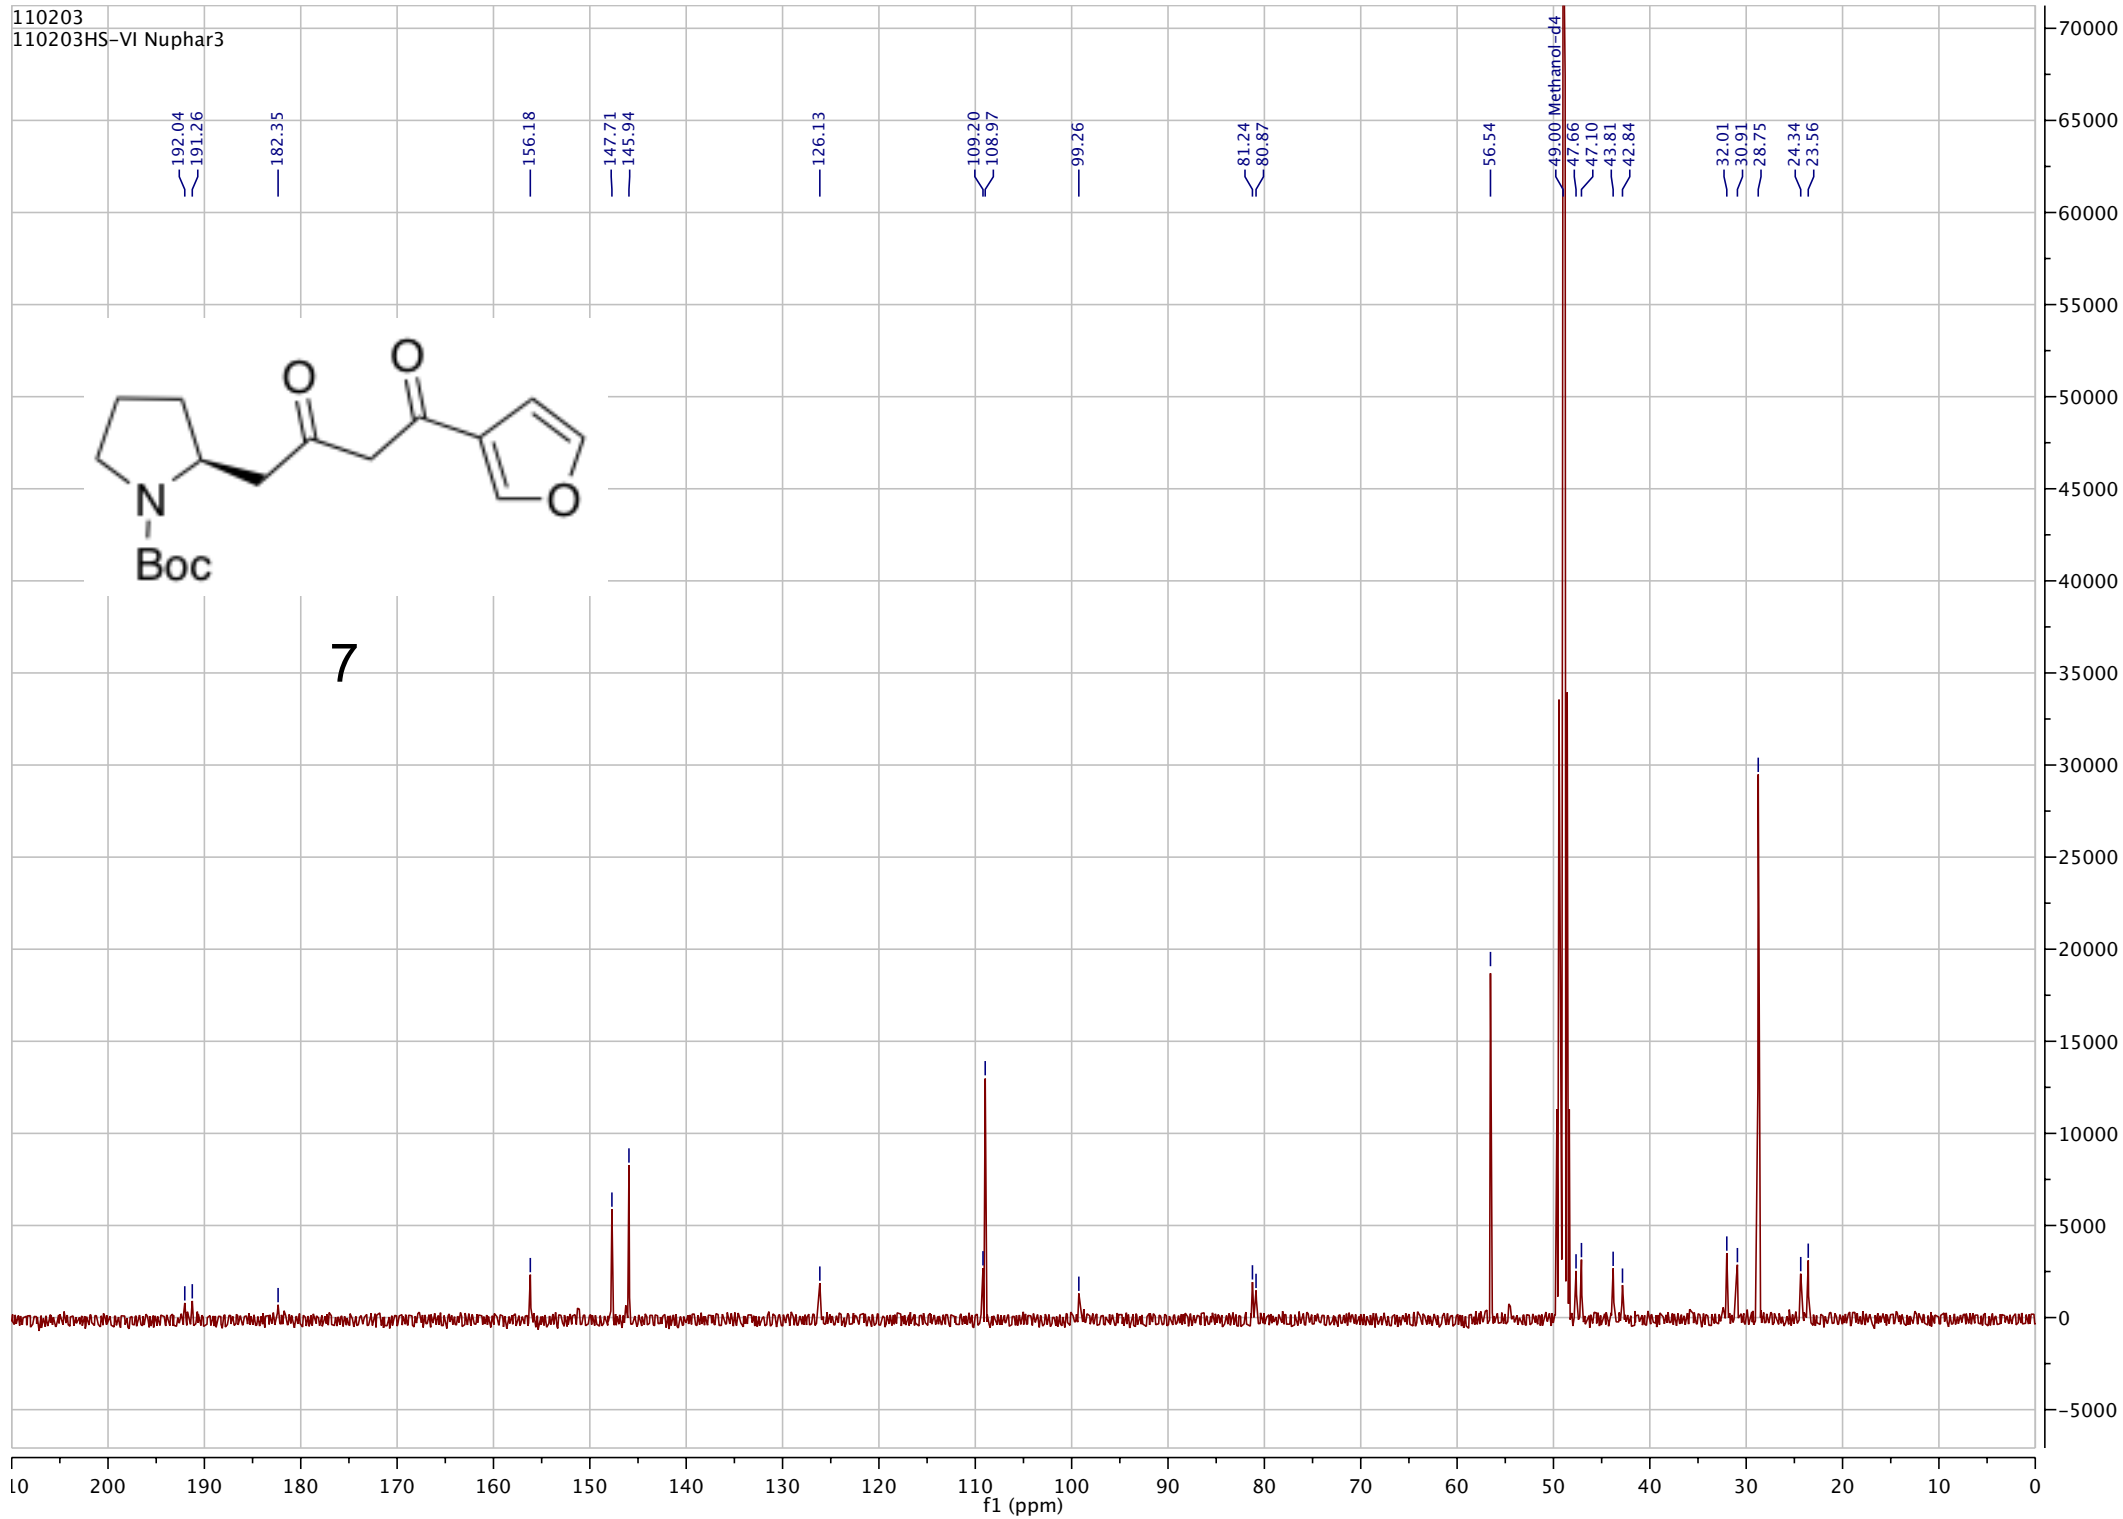

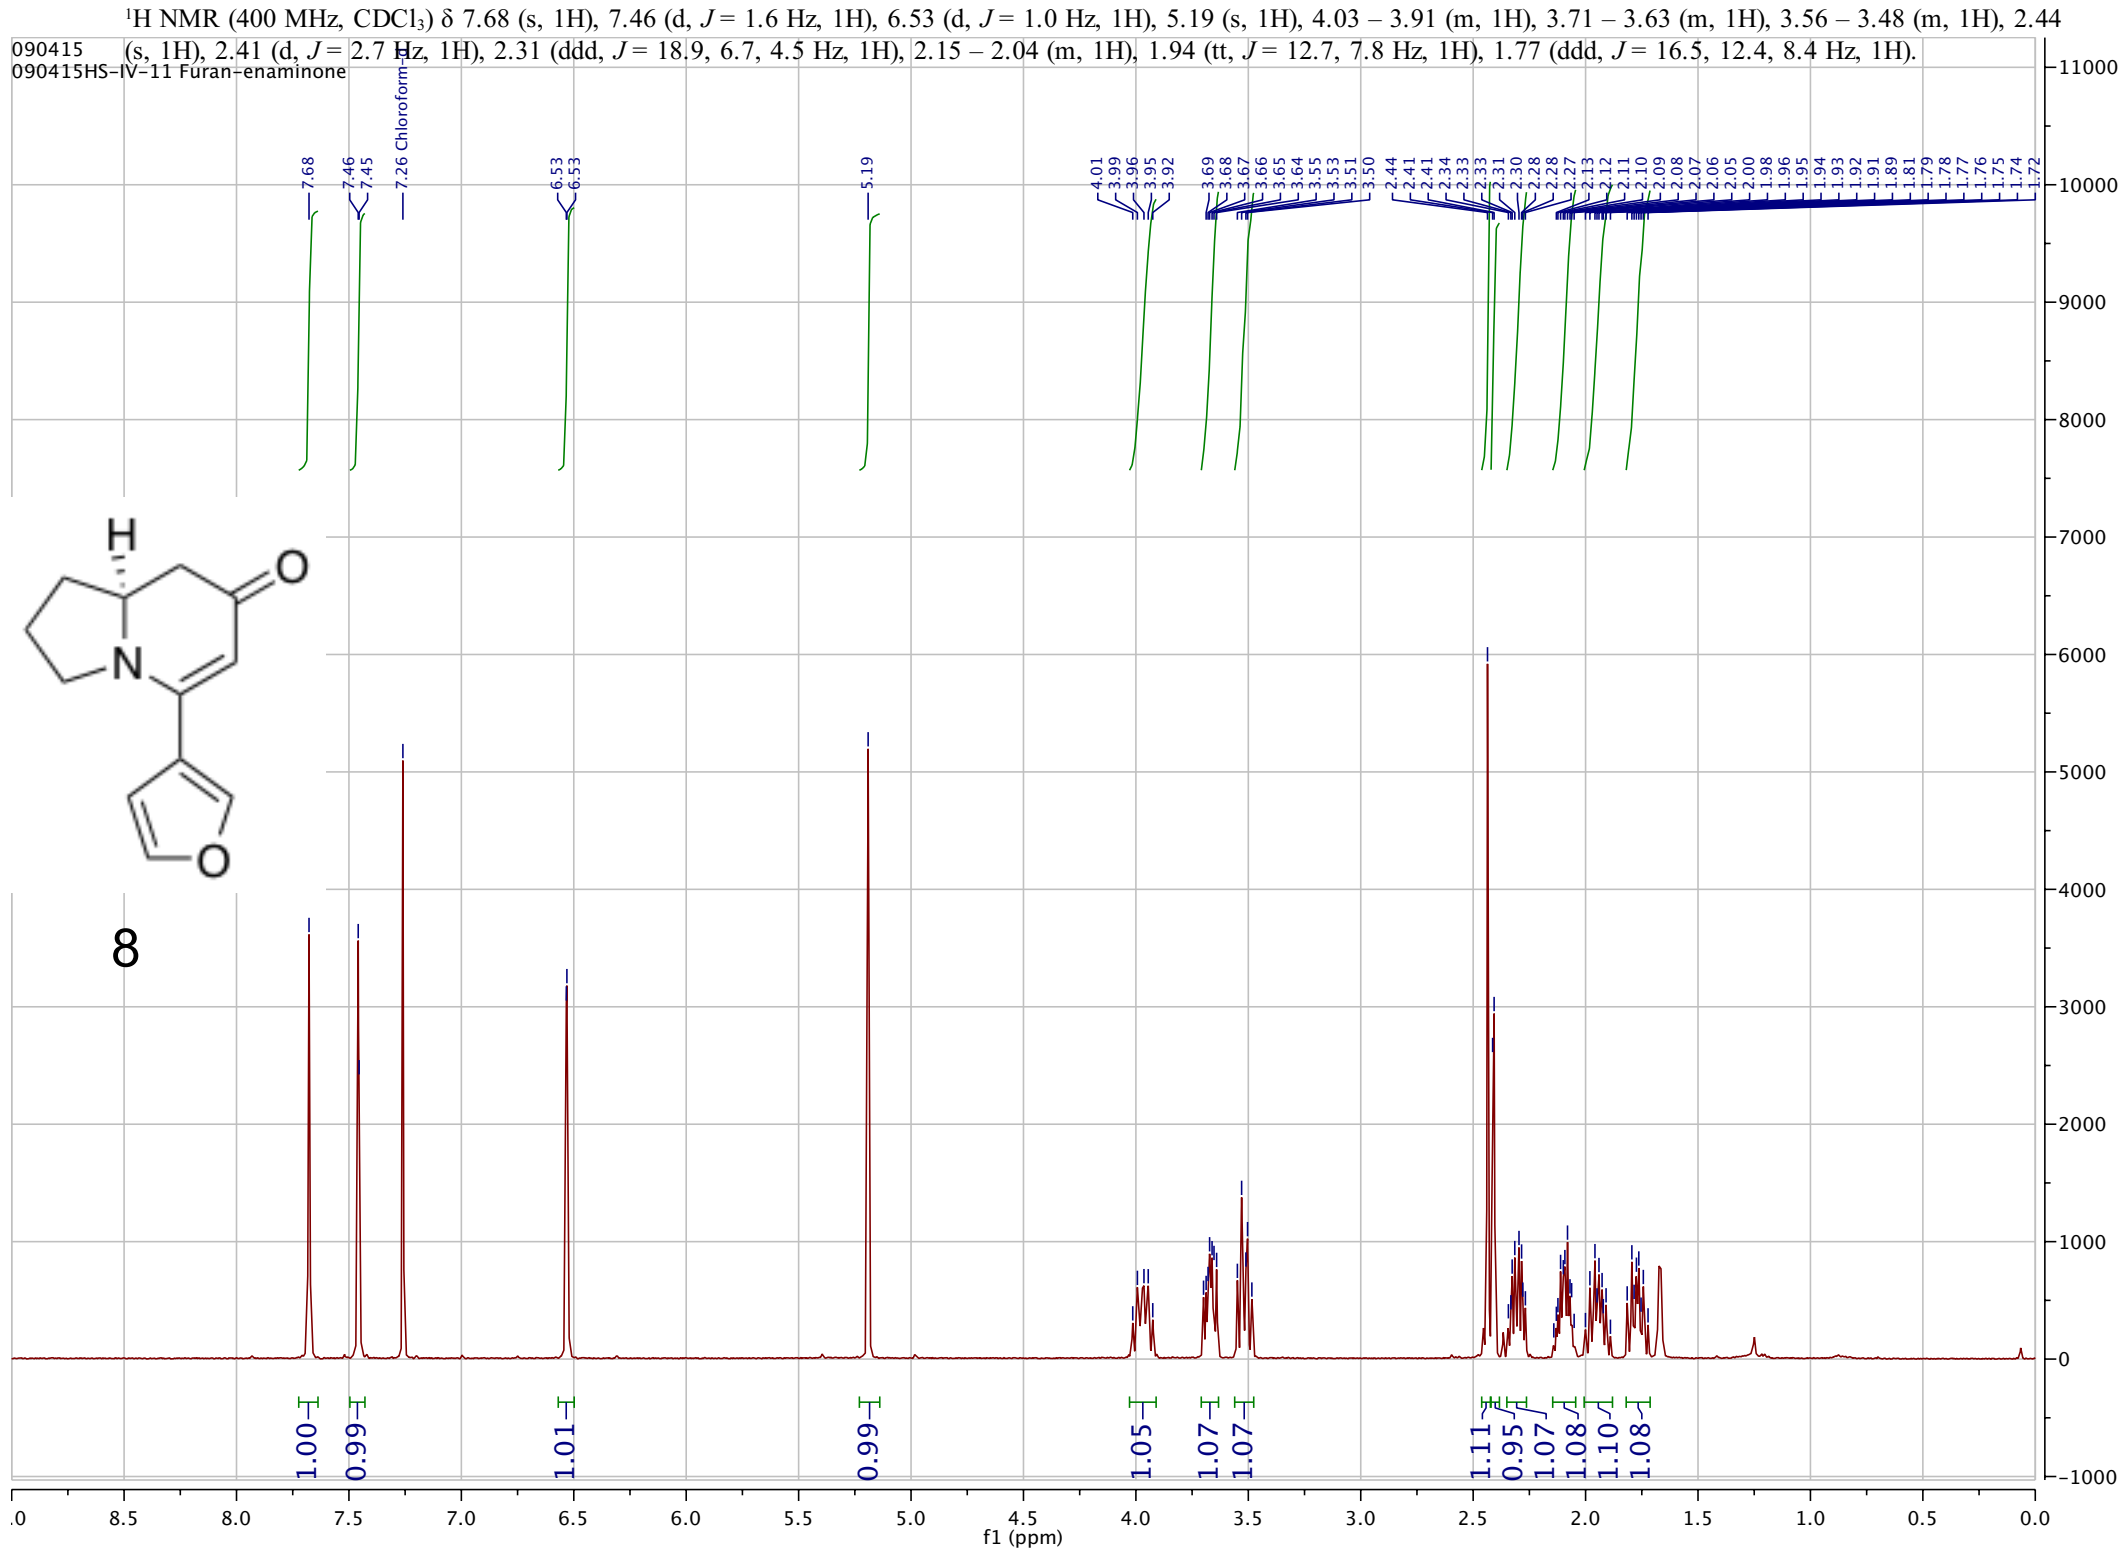

090415 <sup>13</sup>C NMR (101 MHz, CDCl<sub>3</sub>) δ 191.96, 154.33, 143.61, 142.70, 121.91, 110.12, 98.92, 77.16, 59.31, 49.56, 41.57, 31.97, 24.66.

090415HS-IV-11 Furan-enaminone

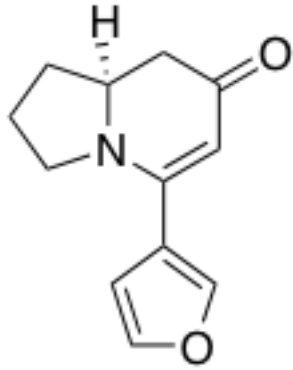

8

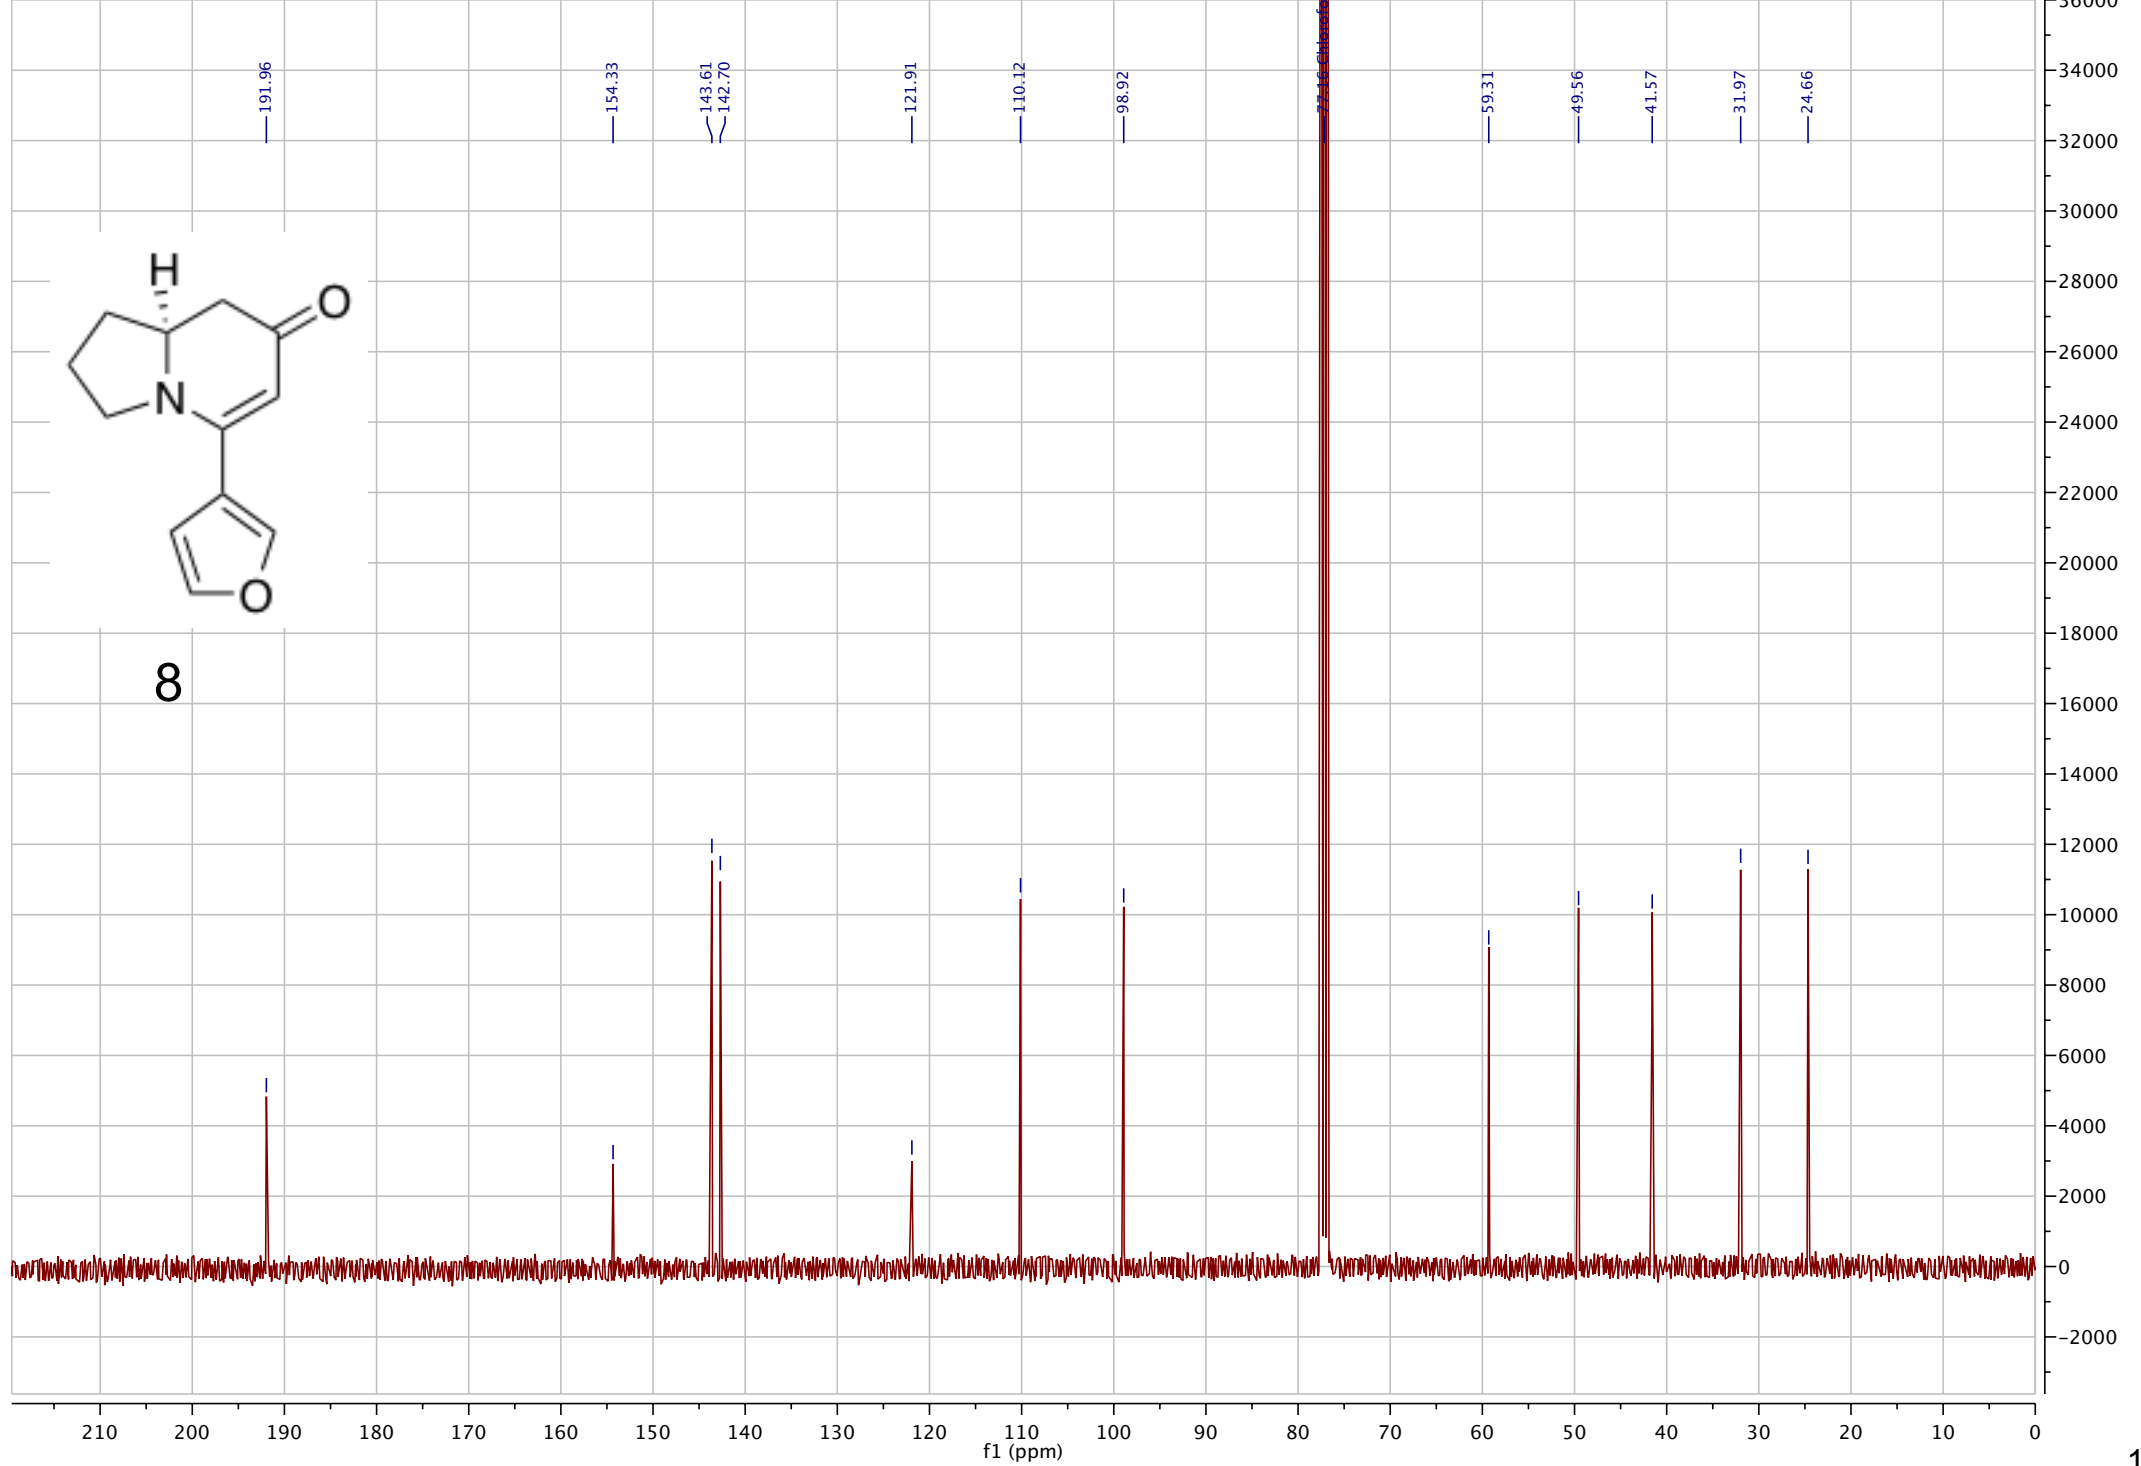

100123  
 100123HS-V-93 <sup>1</sup>H NMR (400 MHz, CDCl<sub>3</sub>) δ 7.69 (s, 1H), 7.47 (t, *J* = 1.6 Hz, 1H), 6.53 (d, *J* = 1.0 Hz, 1H), 5.25 (s, 1H), 4.29 (dt, *J* = 14.9, 7.3 Hz, 1H), 3.82 (s, 3H), 3.76 – 3.68 (m, 1H), 3.54 (dt, *J* = 10.6, 7.6 Hz, 1H), 3.41 (d, *J* = 15.2 Hz, 1H), 2.32 (ddd, *J* = 19.1, 6.8, 4.8 Hz, 1H), 2.16 – 2.04 (m, 1H), 1.96 (ddd, *J* = 14.8, 12.8, 8.3 Hz, 1H), 1.76 (ddd, *J* = 12.5, 7.9 Hz, 1H).

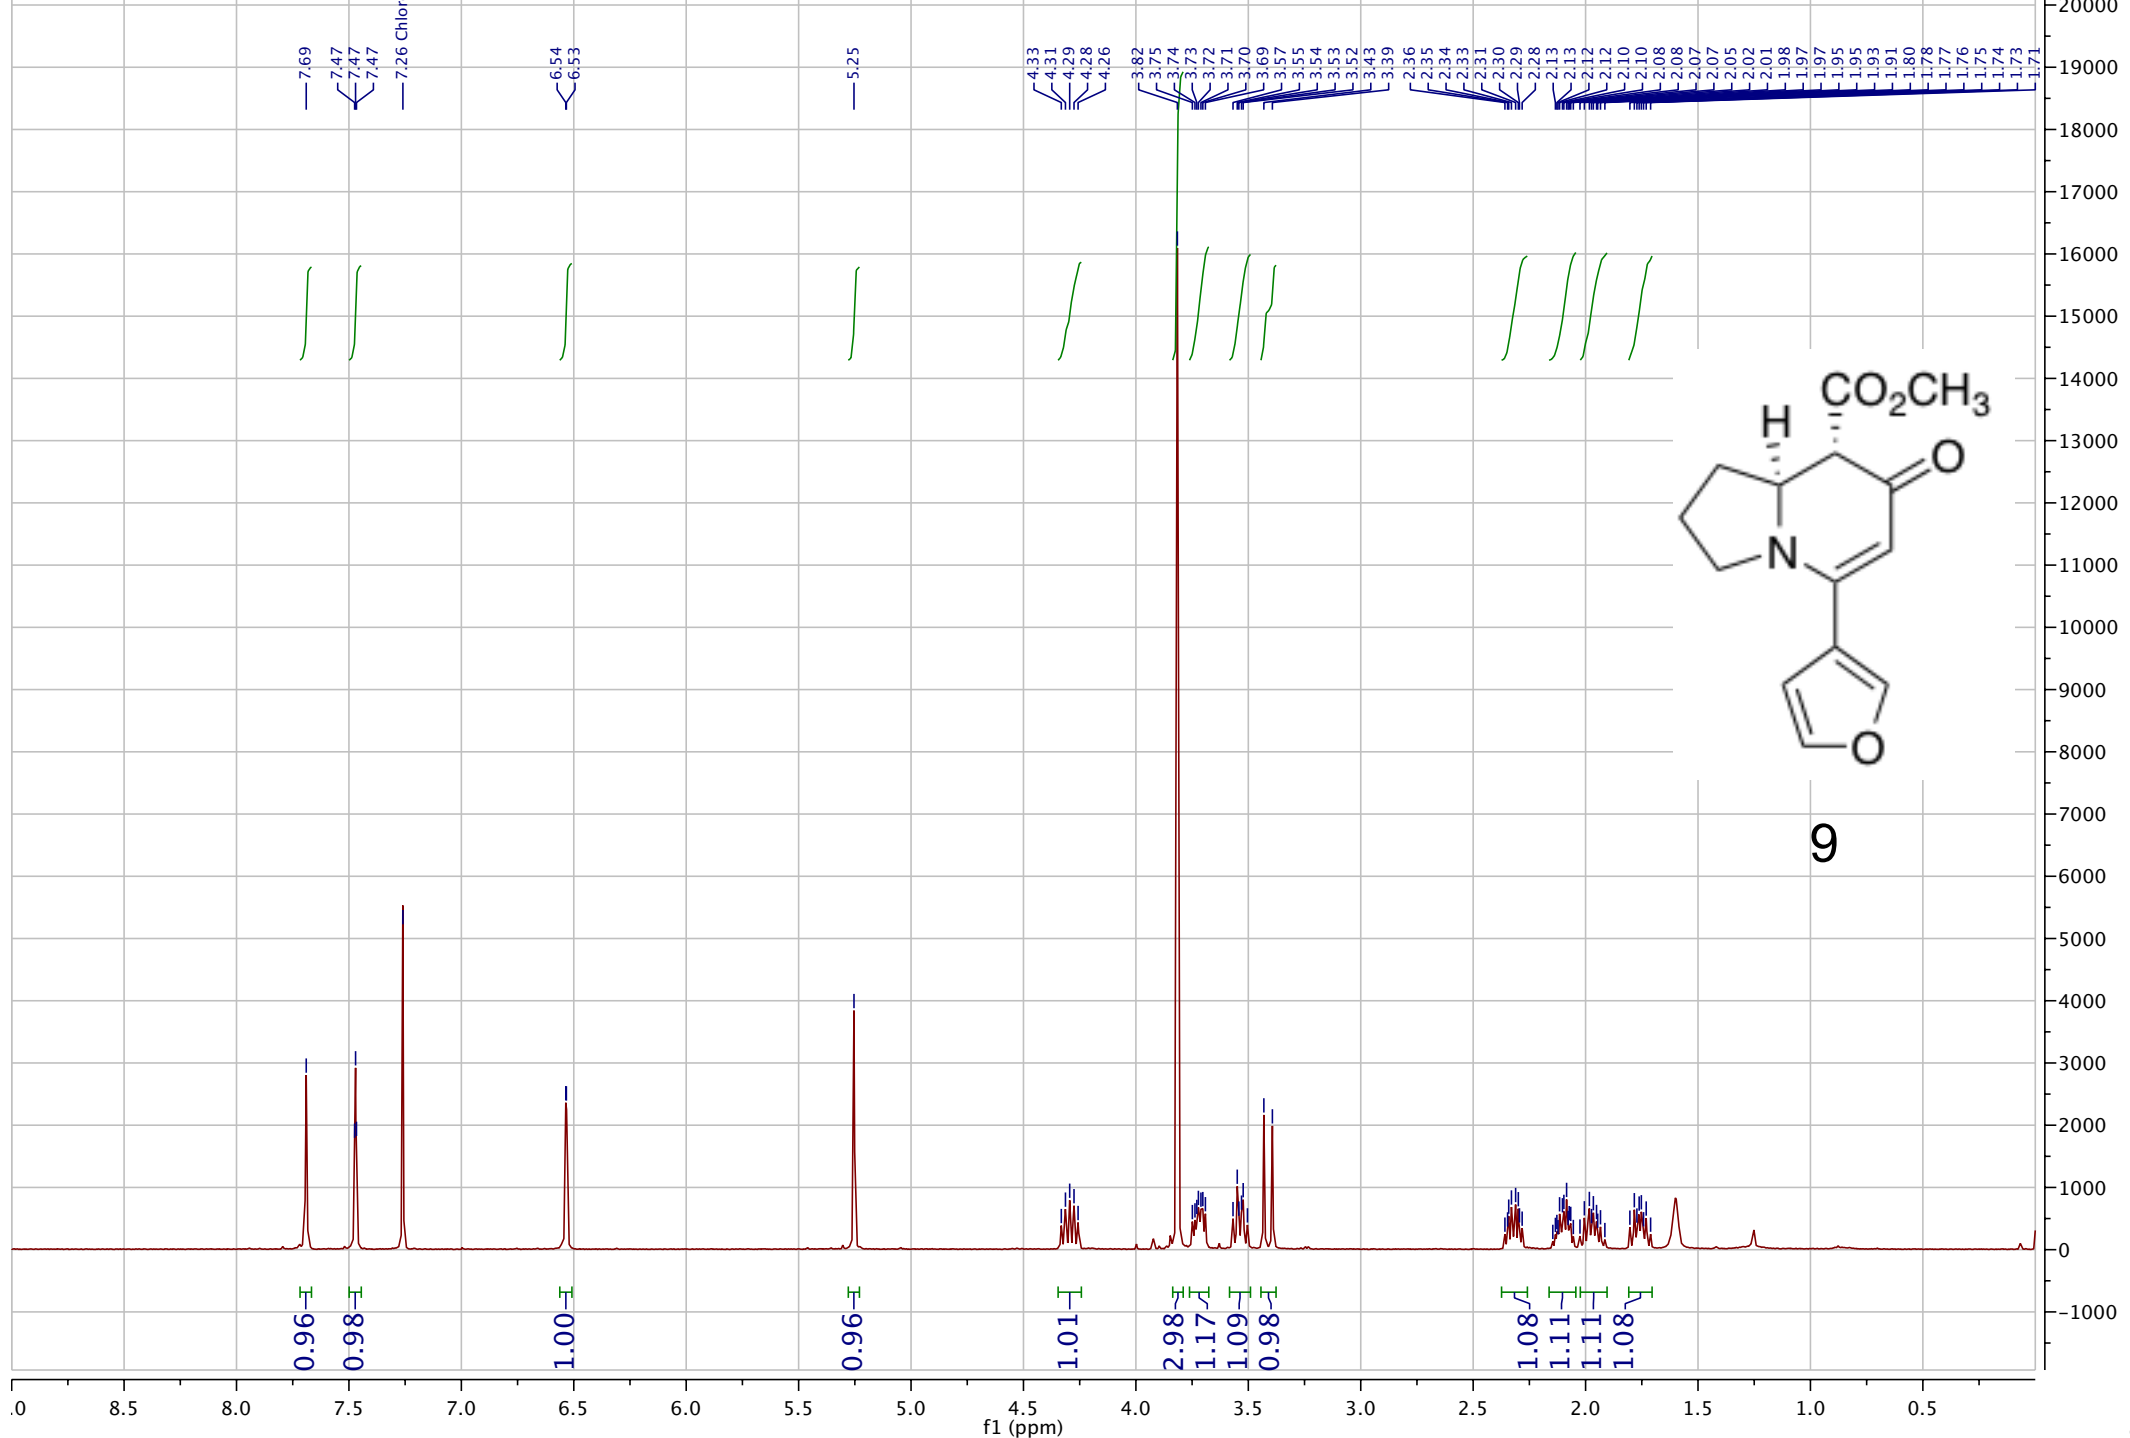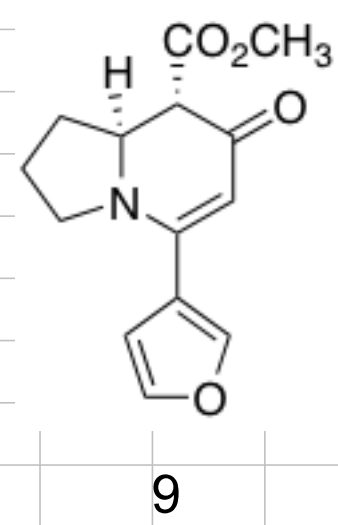

100123  
100123HS-V-93

$^{13}\text{C}$  NMR (101 MHz,  $\text{CDCl}_3$ )  $\delta$  186.08, 170.07, 154.15, 143.78, 142.88, 121.50, 110.05, 98.52, 77.16, 60.70, 56.71, 52.45, 49.97, 30.90, 24.50.

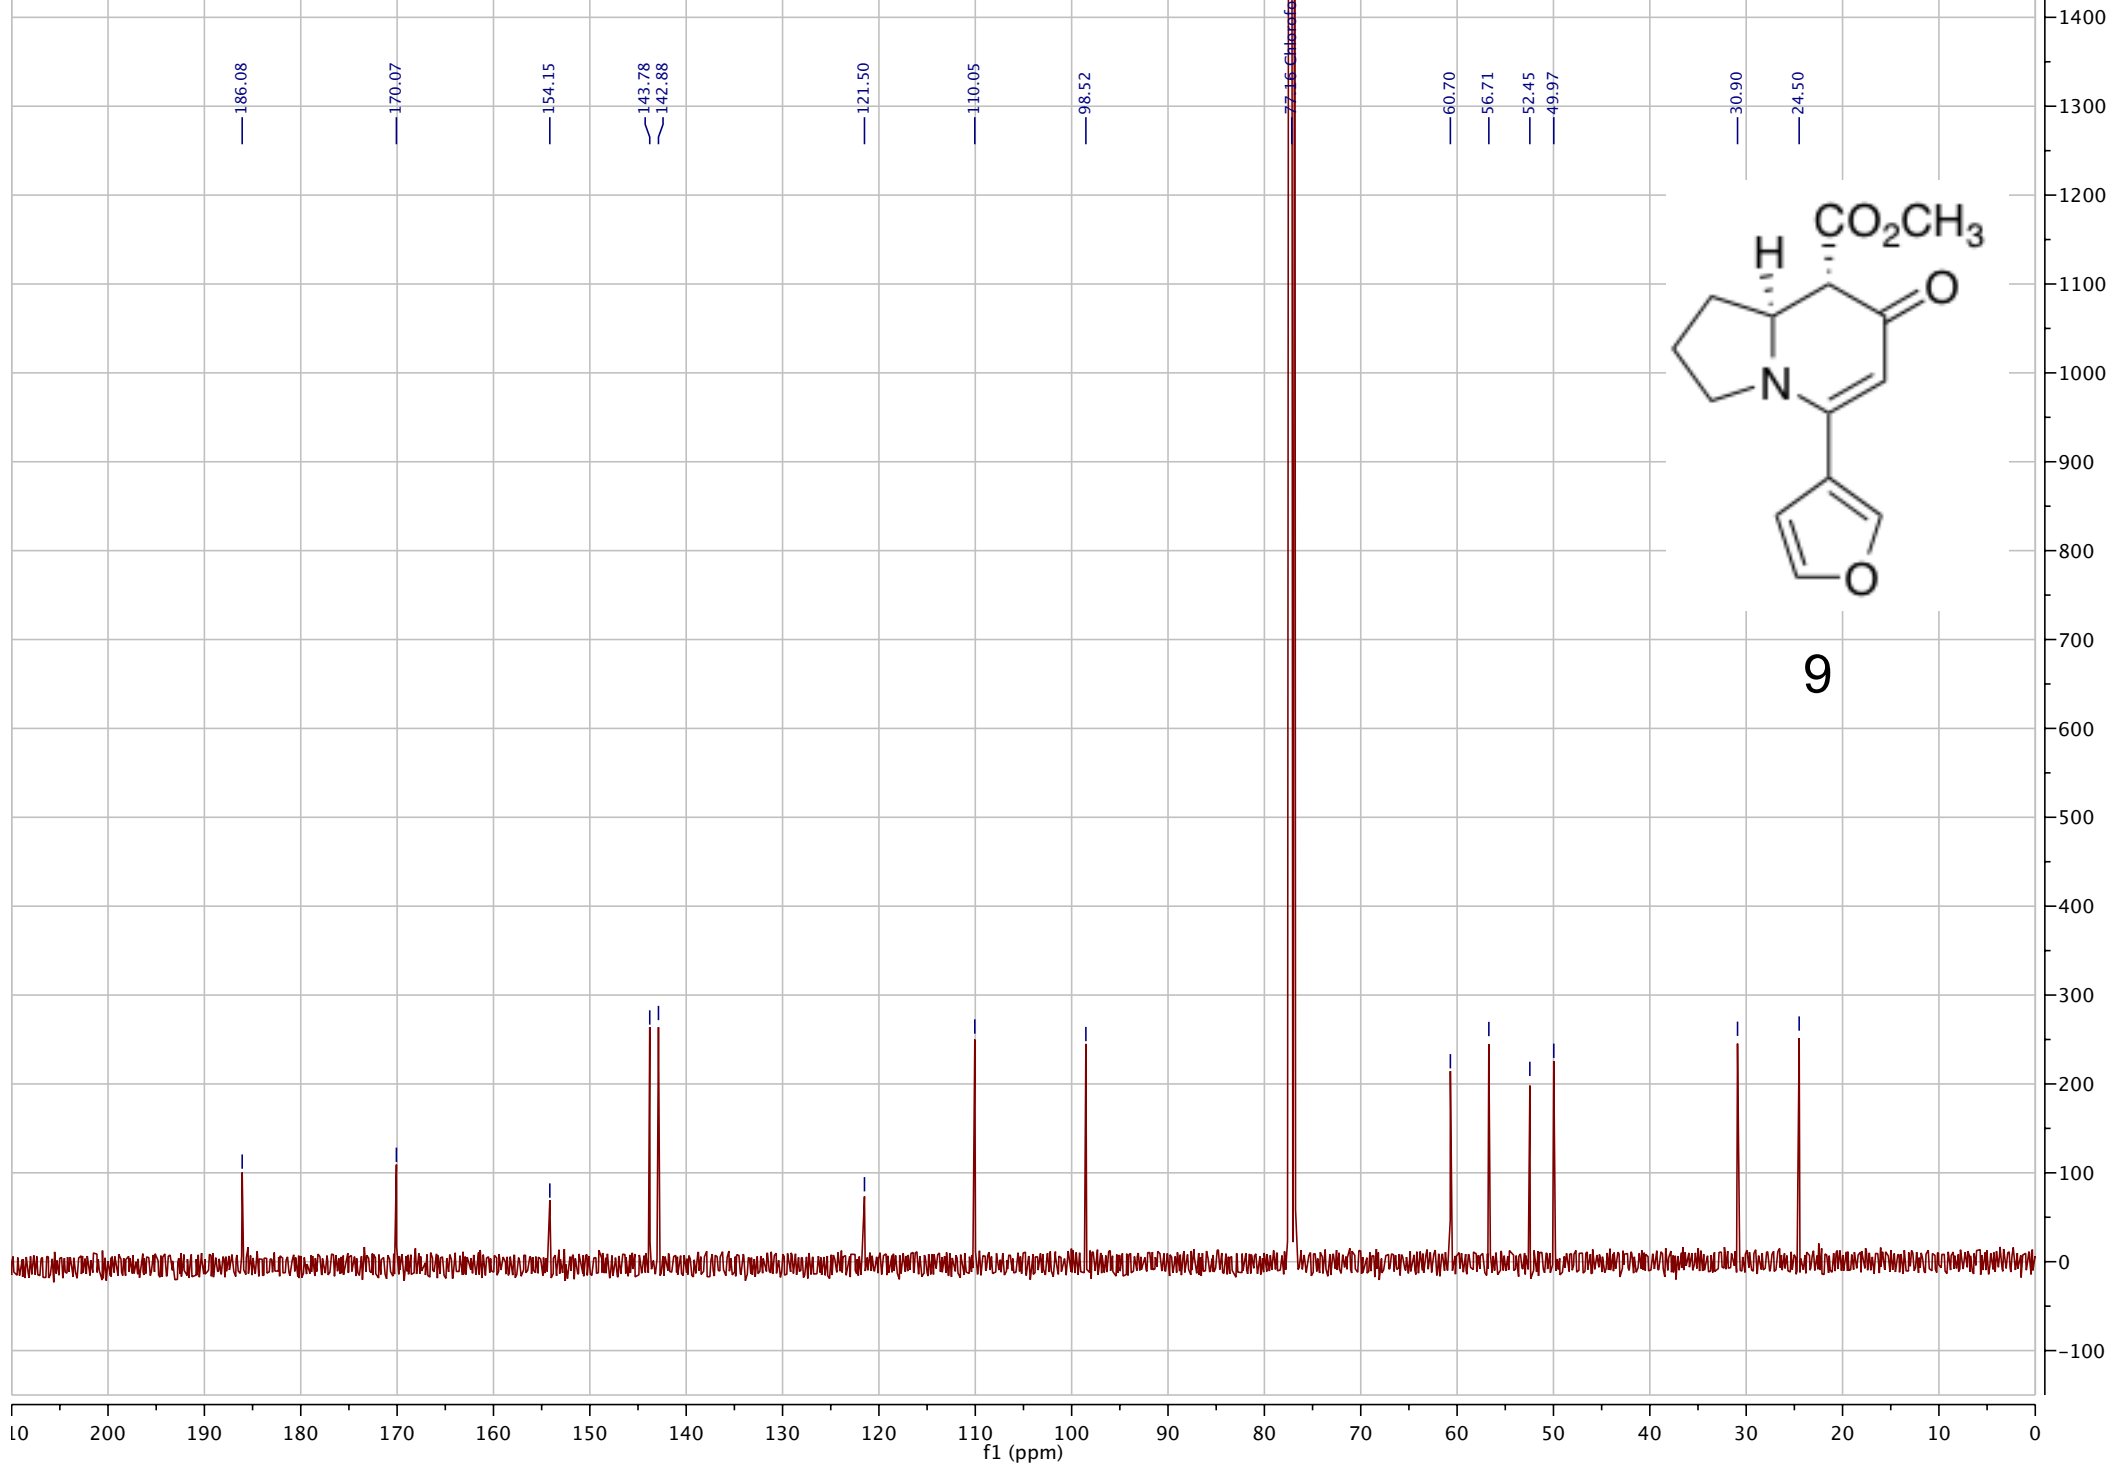

100130  
100130HS-V-99

$^1\text{H NMR}$  (400 MHz,  $\text{CDCl}_3$ )  $\delta$  7.69 – 7.64 (m, 1H), 7.45 (t,  $J = 1.7$  Hz, 1H), 6.53 (dd,  $J = 1.8, 0.8$  Hz, 1H), 5.21 (s, 1H), 3.77 – 3.67 (m, 1H), 3.51 (ddd,  $J = 14.2, 13.8, 7.7$  Hz, 2H), 2.33 (dtd,  $J = 12.6, 6.5, 3.2$  Hz, 1H), 2.23 (dq,  $J = 13.7, 6.8$  Hz, 1H), 2.09 (dddd,  $J = 14.1, 10.6, 7.2, 3.5$  Hz, 1H), 1.99 – 1.87 (m, 1H), 1.84 – 1.73 (m, 1H), 1.15 (d,  $J = 6.8$  Hz, 3H).

7.67  
7.67  
7.46  
7.45

7.26 Chloroform-d

6.54  
6.54  
6.53

5.21

3.74  
3.73  
3.72  
3.71  
3.69  
3.66  
3.56  
3.54  
3.52  
3.50  
3.49  
3.47

2.35  
2.34  
2.33  
2.32  
2.31  
2.26  
2.24  
2.22  
2.20  
2.10  
2.09  
2.08  
2.07  
1.95  
1.94  
1.92  
1.81  
1.79  
1.78  
1.18  
1.15

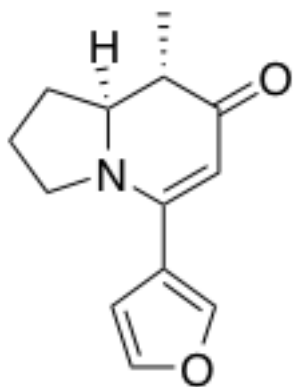

10a

1.00

1.01

1.09

1.06

1.14

2.39

1.11

1.11

1.14

1.18

1.17

3.09

0 8.5 8.0 7.5 7.0 6.5 6.0 5.5 5.0 4.5 4.0 3.5 3.0 2.5 2.0 1.5 1.0 0.5 0.0

f1 (ppm)



<sup>13</sup>C NMR (101 MHz, CDCl<sub>3</sub>) δ 194.19, 153.50, 143.53, 142.46, 121.78, 110.18, 98.58, 77.16, 65.21, 49.79, 43.72, 31.68, 24.51, 11.78.

100130

100130HS-V-99

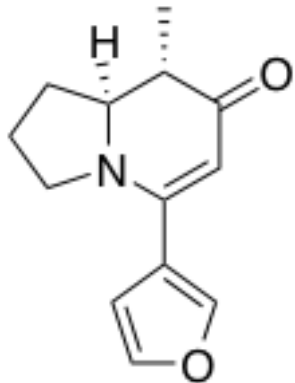

10a

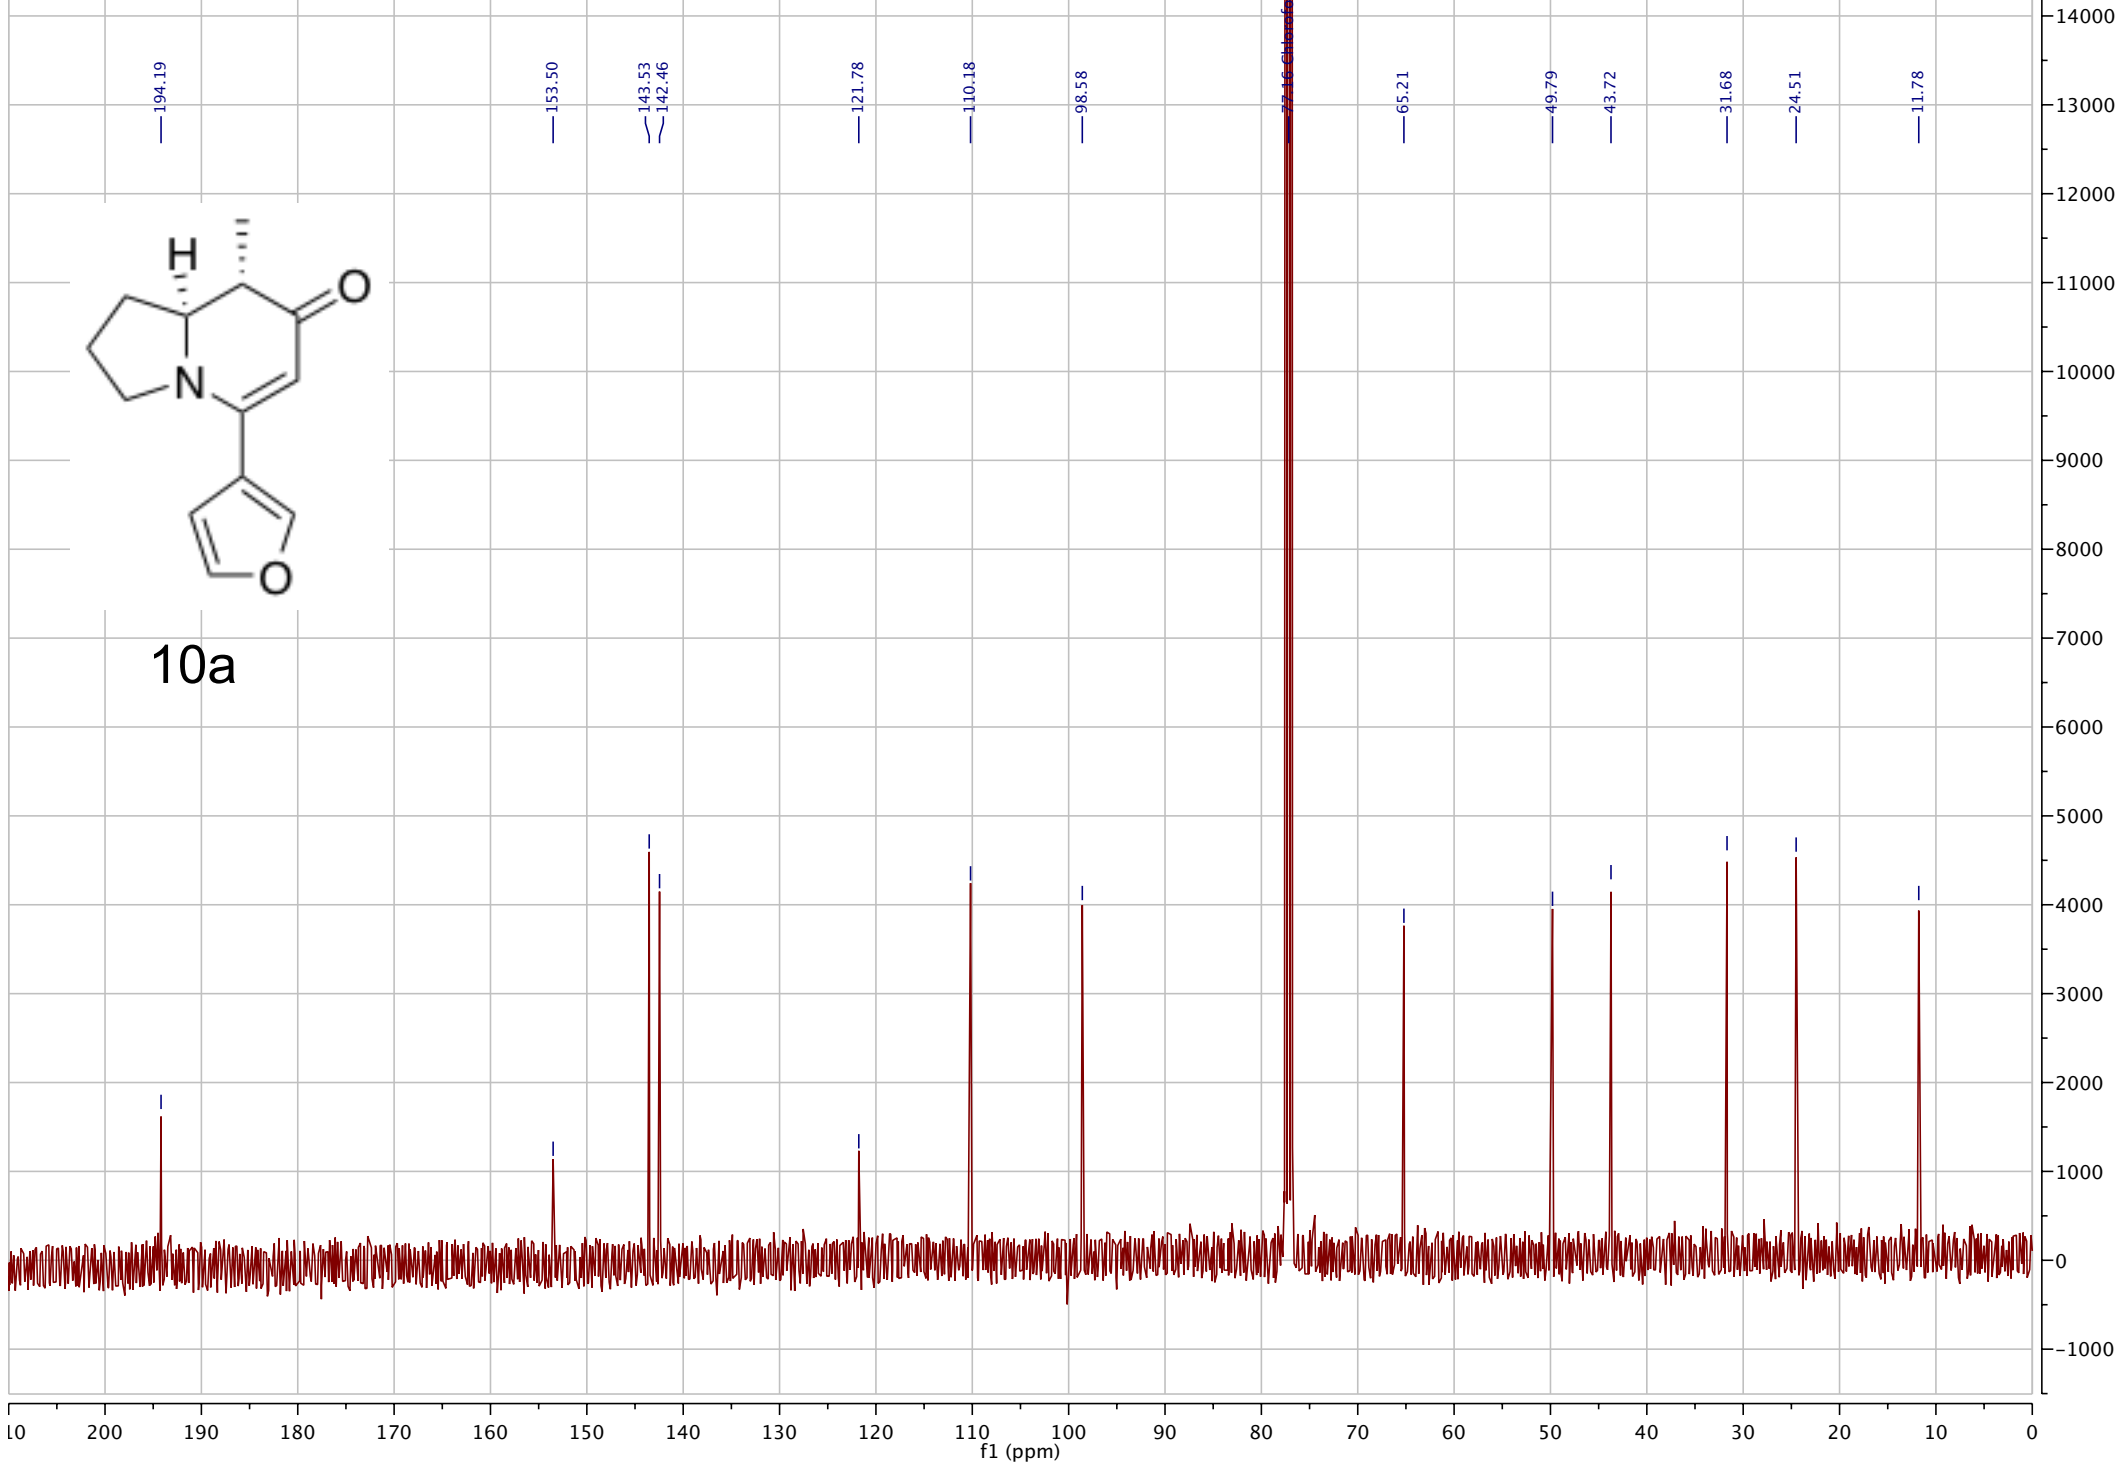

110103  
110103HS-VI-117 minor

$^1\text{H}$  NMR (400 MHz,  $\text{CDCl}_3$ )  $\delta$  7.69 (s, 1H), 7.46 (t,  $J = 1.6$  Hz, 1H), 6.57 – 6.52 (m, 1H), 5.12 (s, 1H), 4.04 (dd,  $J = 11.6, 7.4$  Hz, 1H), 3.74 – 3.67 (m, 1H), 3.54 (dt,  $J = 10.7, 6.9$  Hz, 1H), 2.31 – 2.23 (qd,  $J = 7.3, 4.0$  Hz, 1H), 2.14 – 2.03 (m, 2H), 2.01 – 1.90 (m, 2H), 1.04 (d,  $J = 7.3$  Hz, 3H).

7.69  
7.47  
7.46  
7.46  
7.26 Chloroform-d

6.55  
6.54  
6.54

5.12

4.06  
4.05  
4.04

3.73  
3.71  
3.70

3.69  
3.68  
3.57  
3.55  
3.54

3.53  
3.52  
3.51

2.29  
2.28  
2.27  
2.26

2.12  
2.10  
2.09

2.08  
2.06  
2.05

2.00  
1.99  
1.98

1.97  
1.96  
1.95  
1.94

1.93

1.05  
1.03

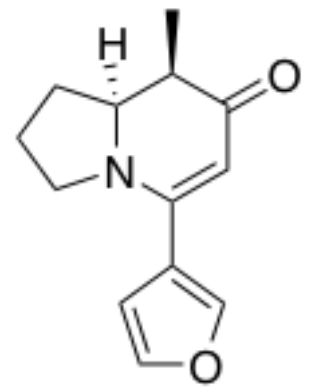

10b

1.03

1.00

1.02

1.11

1.11

1.13

1.10

1.10

2.21

2.21

3.17

0 8.5 8.0 7.5 7.0 6.5 6.0 5.5 5.0 4.5 4.0 3.5 3.0 2.5 2.0 1.5 1.0 0.5 0.0

f1 (ppm)

110103  
110103HS-VI-117 minor

$^{13}\text{C}$  NMR (101 MHz,  $\text{CDCl}_3$ )  $\delta$  196.90, 153.31, 143.61, 142.59, 121.63, 110.10, 96.98, 77.16, 62.42, 49.89, 42.50, 27.08, 24.98, 10.95.

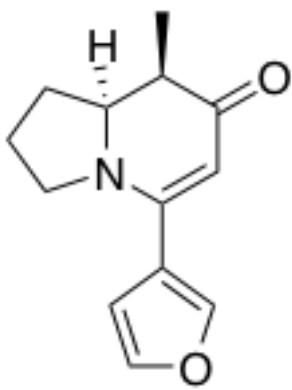

10b

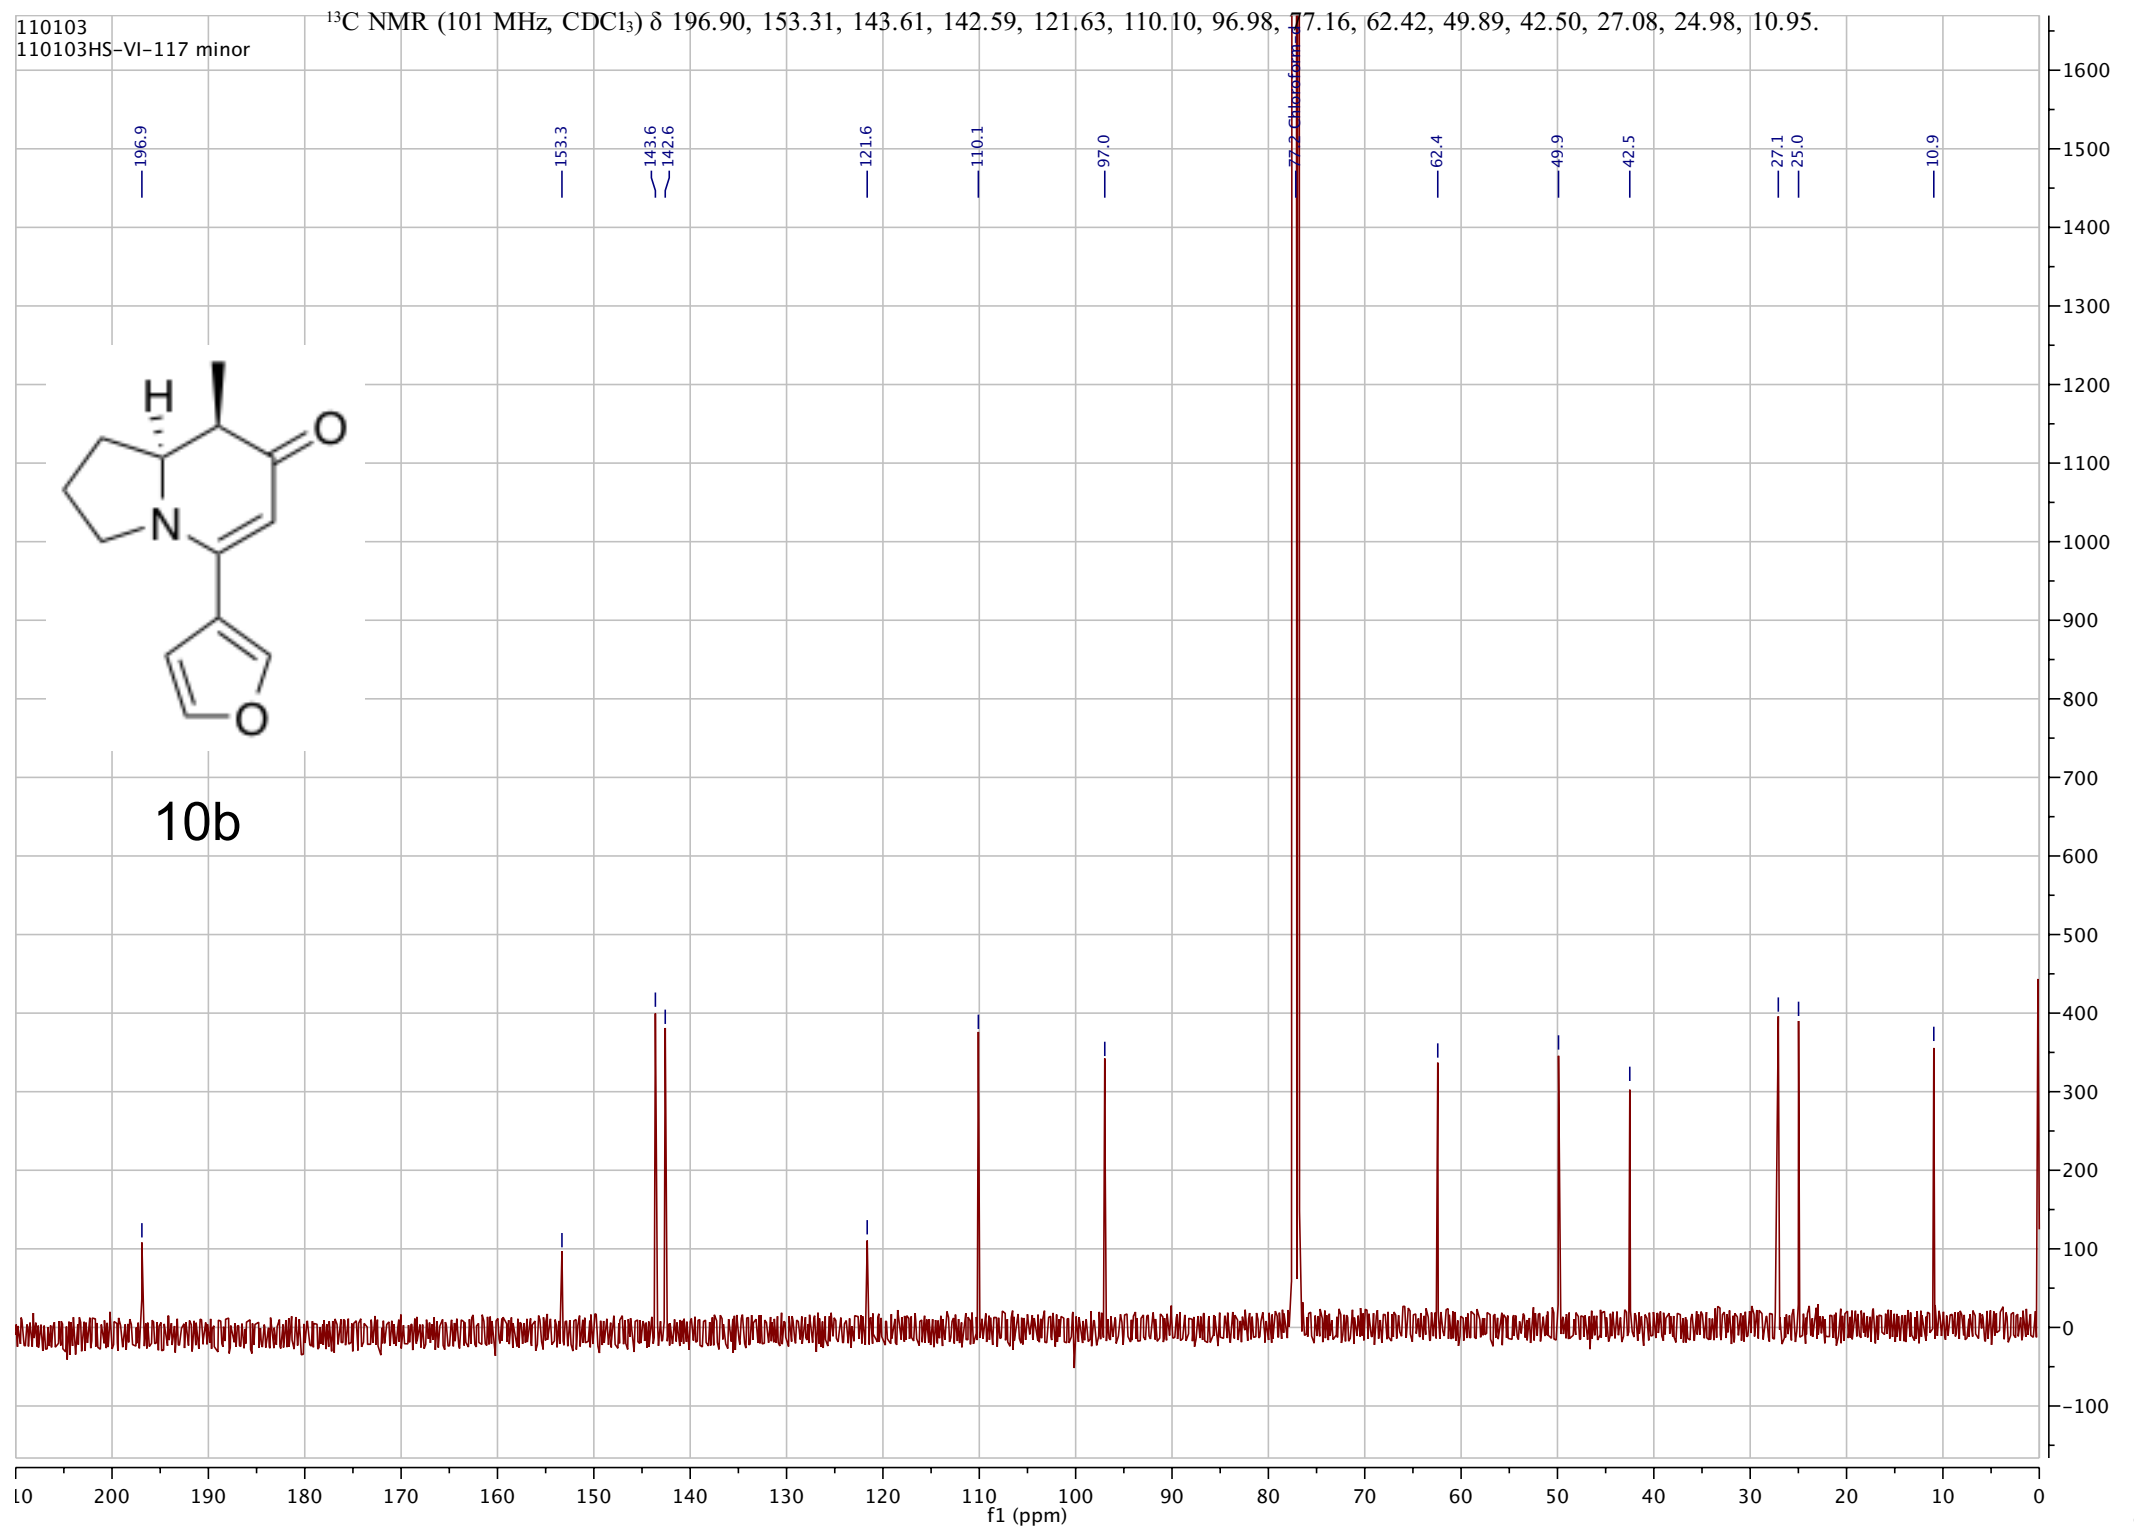

101024  
101024HS-VI-60

$^1\text{H NMR}$  (400 MHz,  $\text{CDCl}_3$ )  $\delta$  7.34 (d,  $J = 0.9$  Hz, 2H), 6.44 (s, 1H), 2.95 – 2.84 (m, 2H), 1.93 (ddd,  $J = 23.6$ , 12.8, 7.4 Hz, 2H), 1.83 – 1.36 (m, 9H), 1.14 – 1.00 (m, 1H), 0.91 (d,  $J = 6.5$  Hz, 3H).

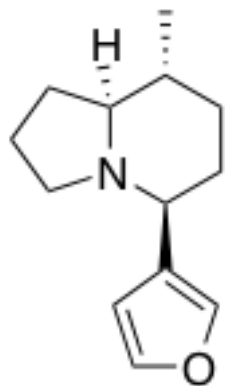

1

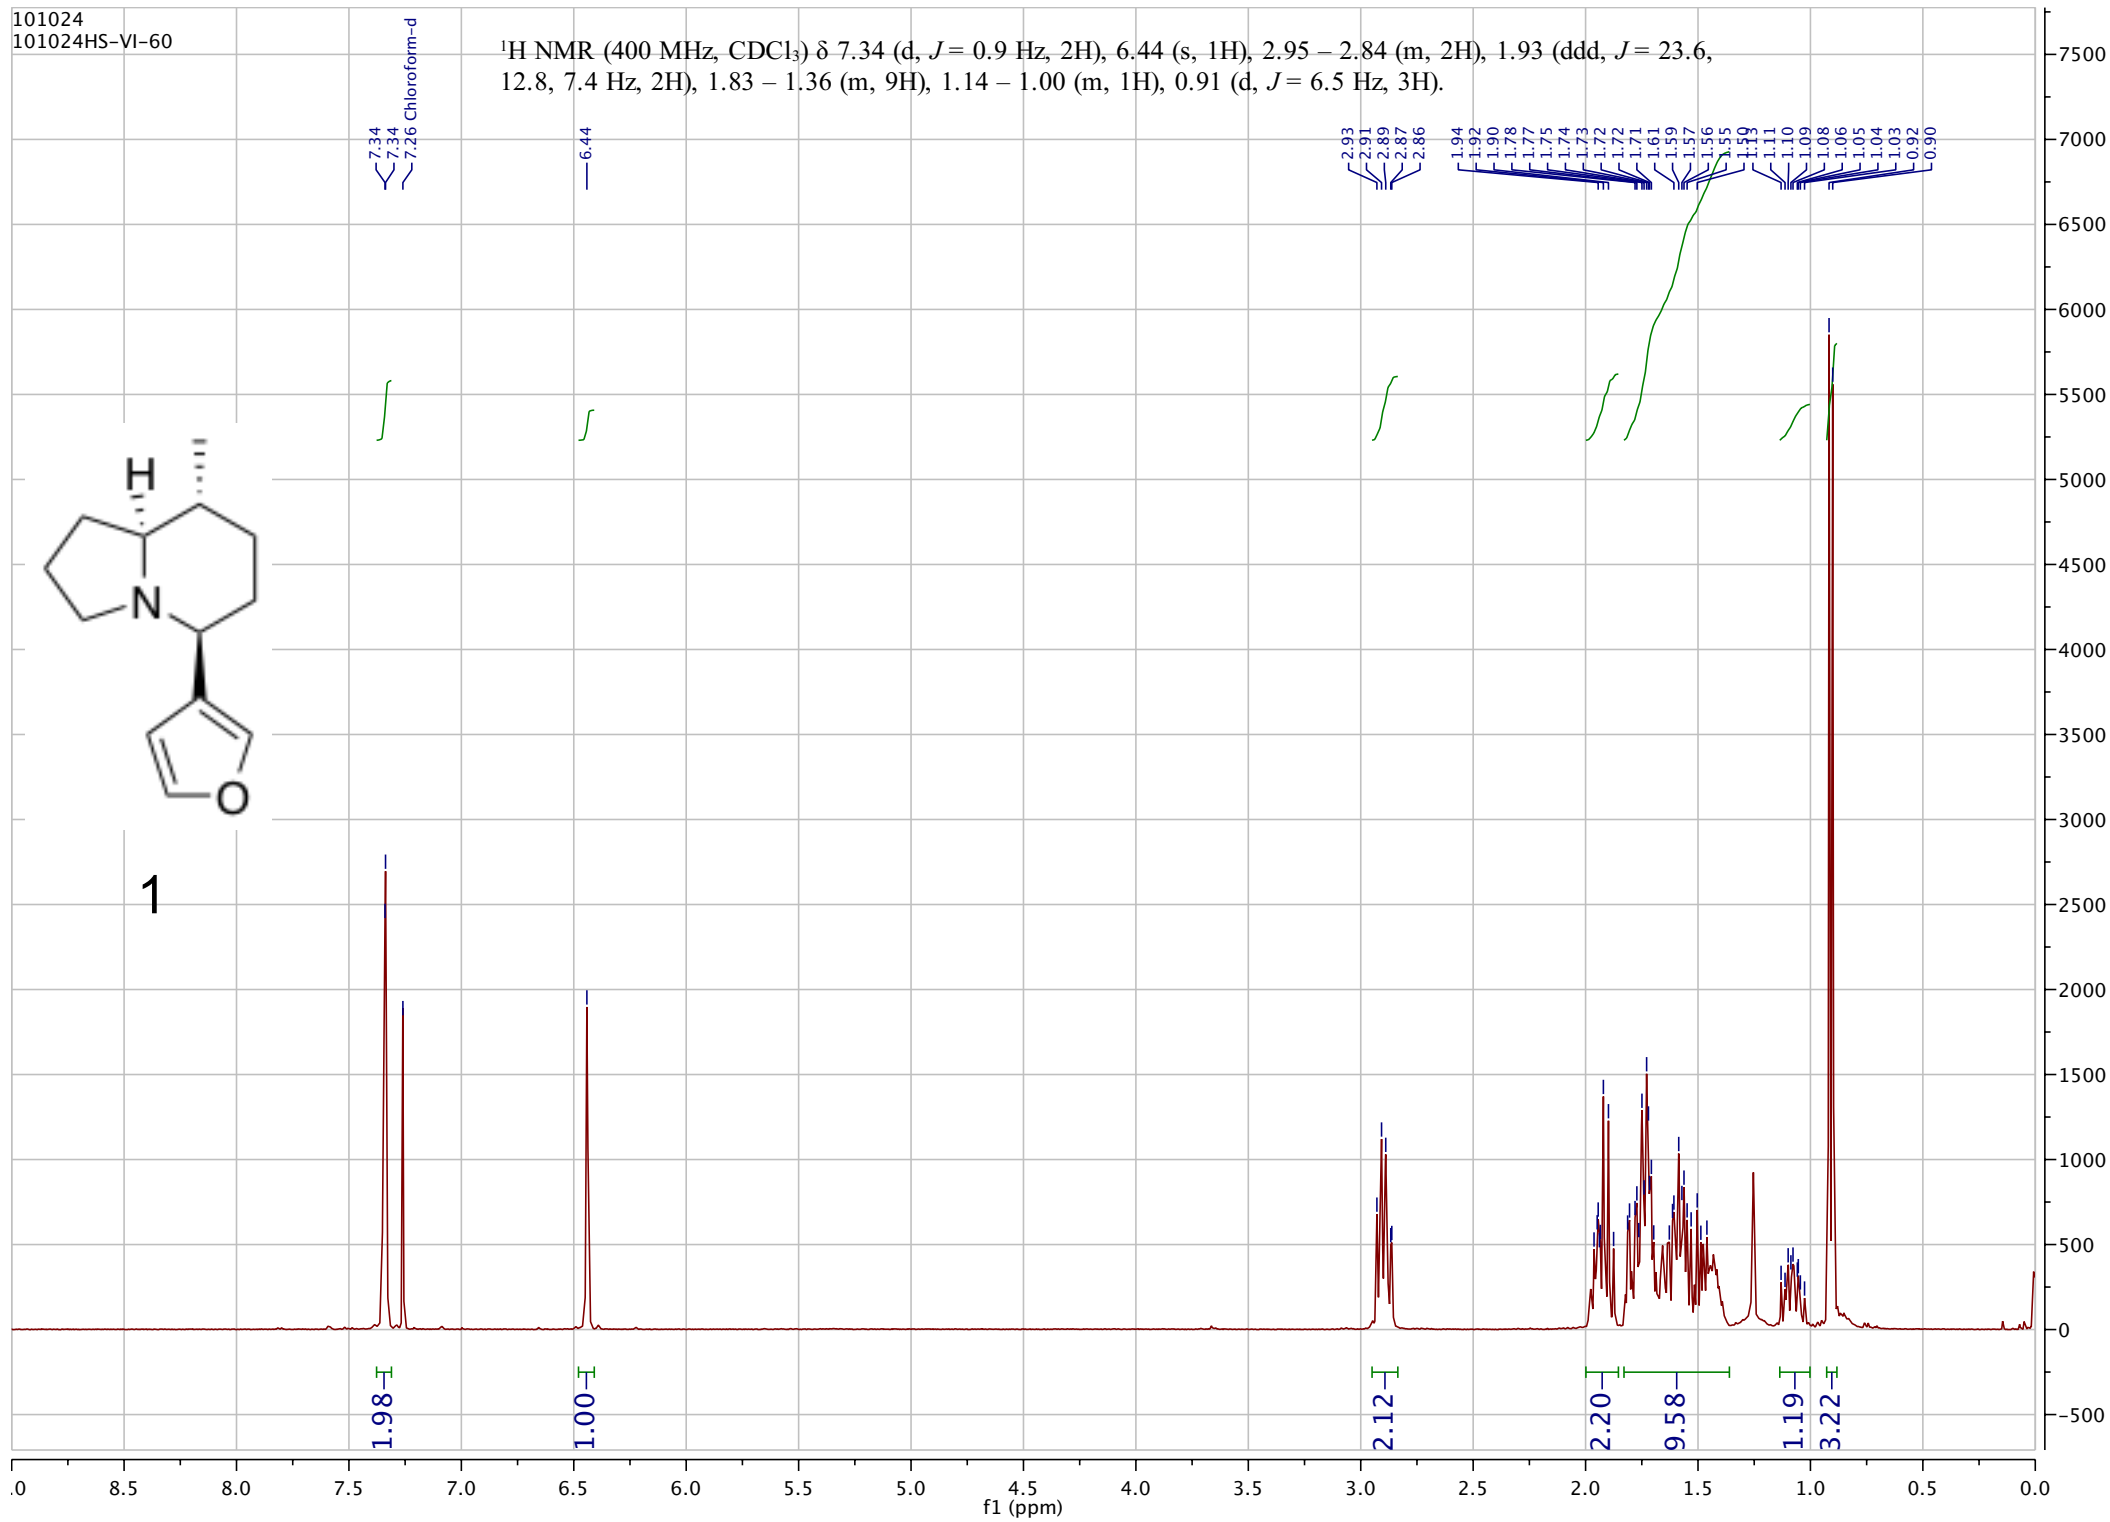

101024  
101024HS-VI-60

$^{13}\text{C}$  NMR (101 MHz,  $\text{CDCl}_3$ )  $\delta$  142.84, 139.45, 128.40, 109.88, 77.16, 71.58, 59.91, 53.31, 36.57, 34.32, 34.05, 29.21, 20.25, 18.98.

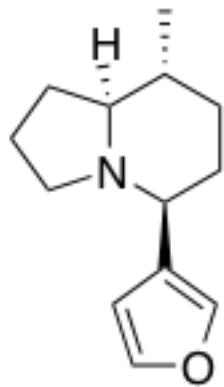

1

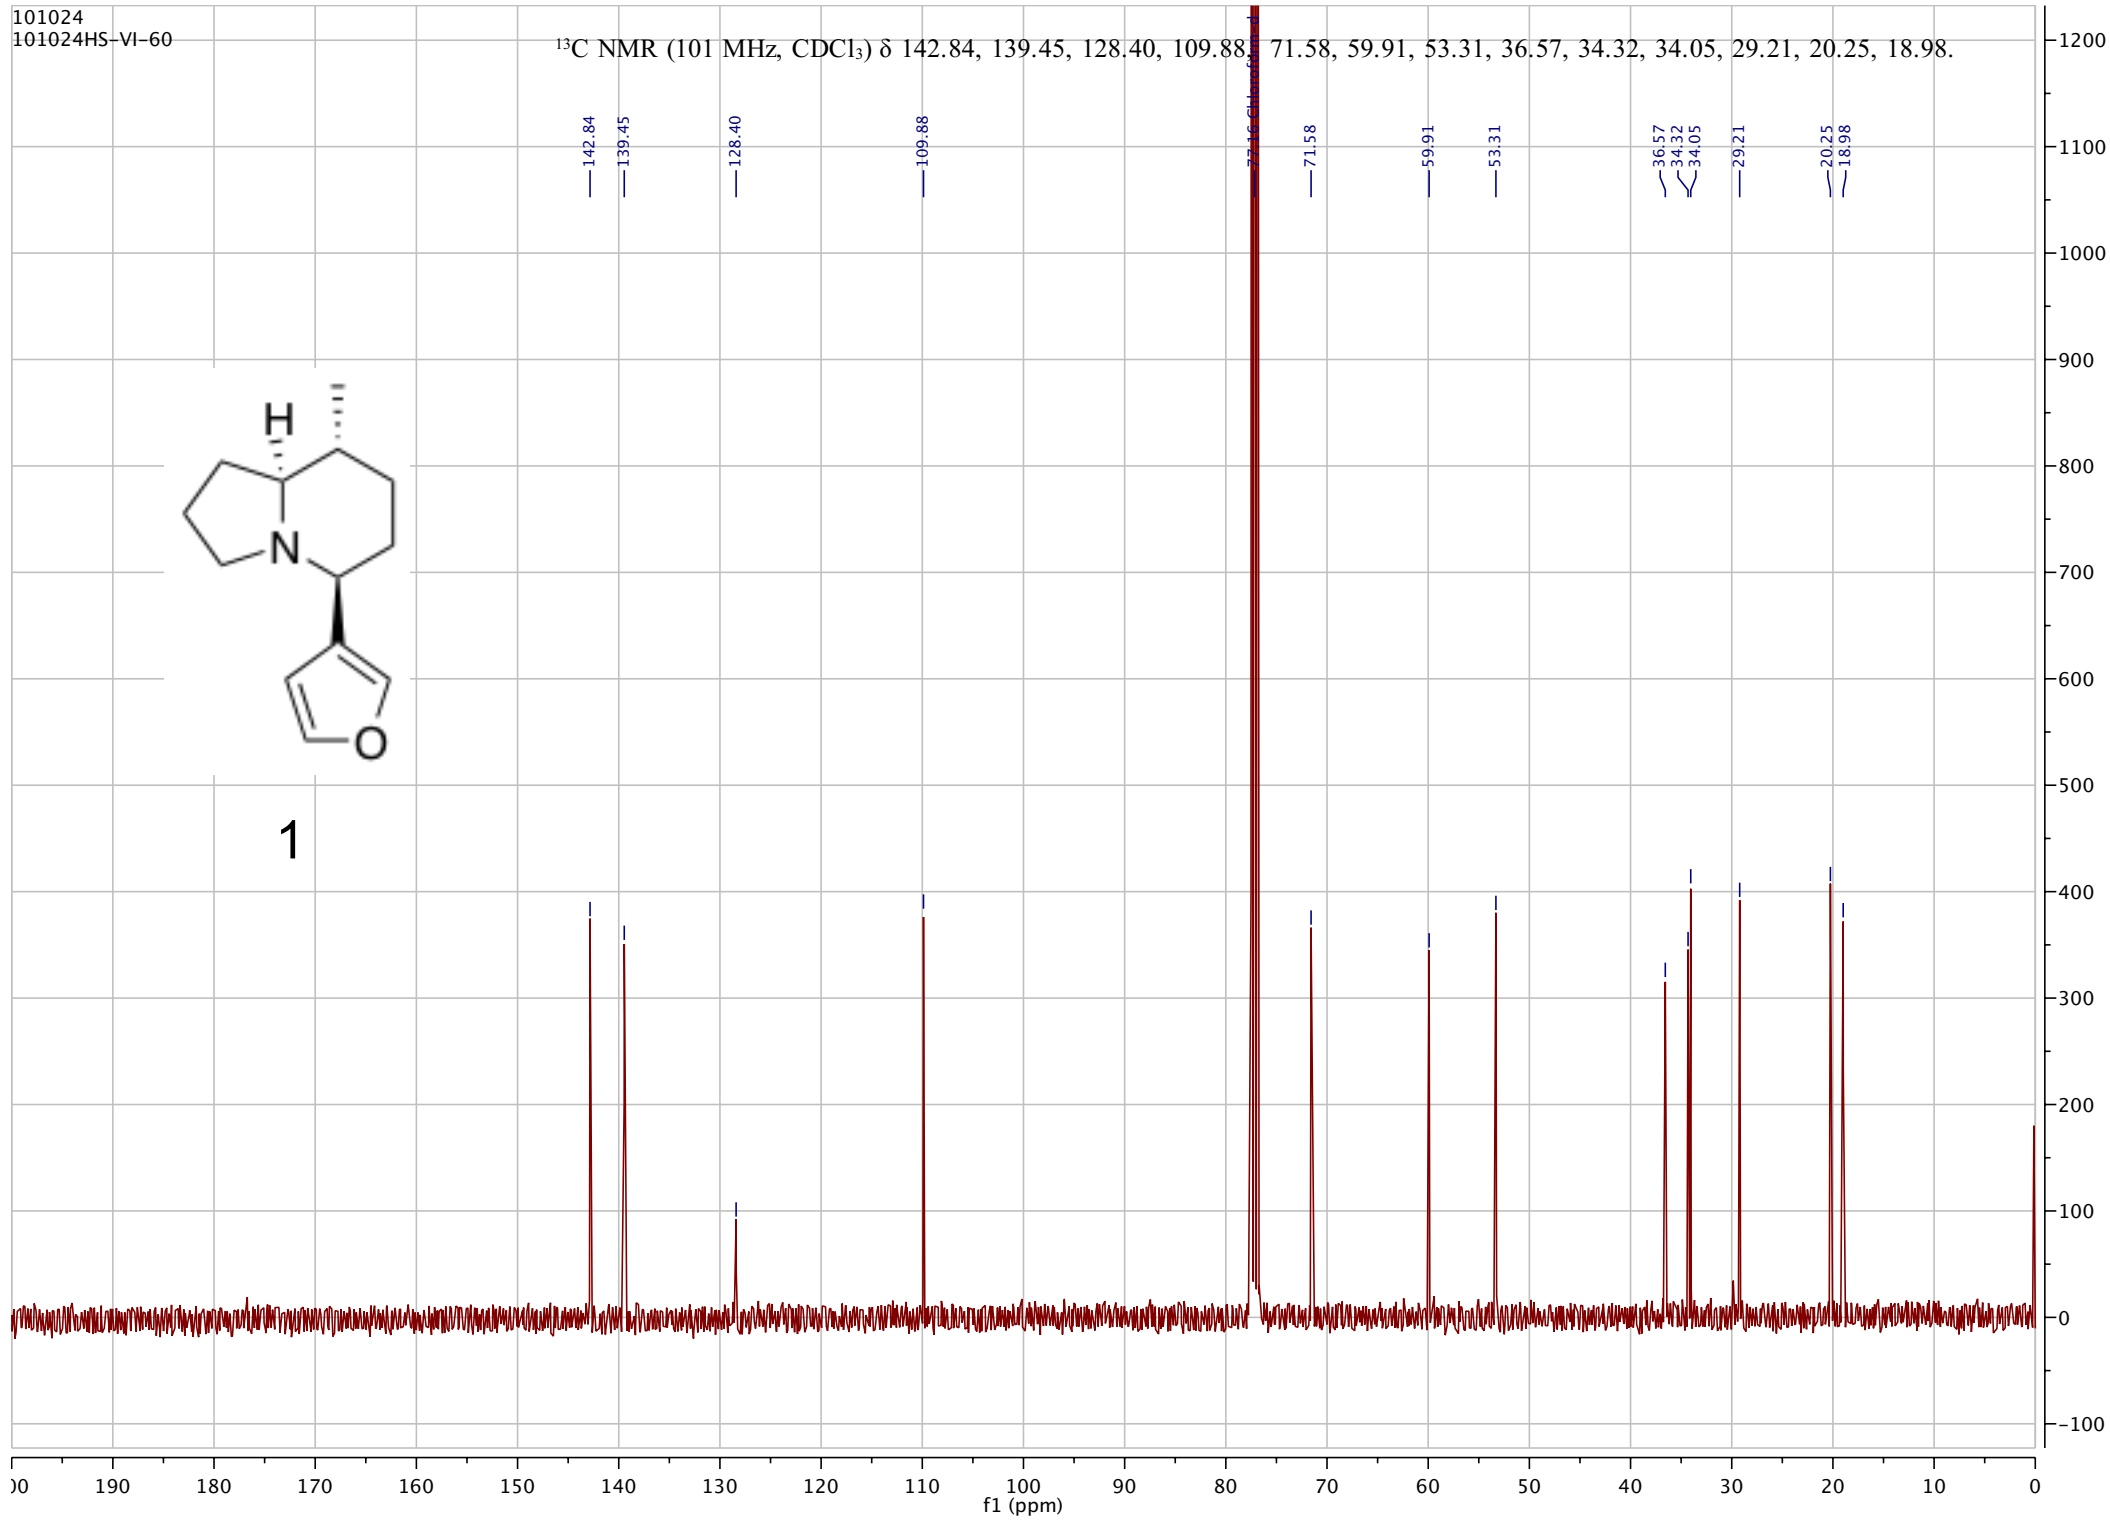

110112  
110112HS-VI-124

$^1\text{H}$  NMR (400 MHz,  $\text{CDCl}_3$ )  $\delta$  7.36 – 7.30 (m, 2H), 6.43 (s, 1H), 2.90 – 2.83 (m, 2H), 2.14 – 2.06 (m, 1H), 1.93 (td,  $J = 6.8, 2.8$  Hz, 1H), 1.87 – 1.75 (m, 2H), 1.70 – 1.53 (m, 7H), 1.52 – 1.45 (m, 1H), 1.04 (d,  $J = 7.0$  Hz, 3H).

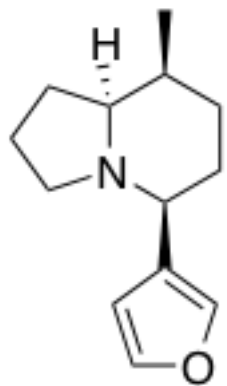

2

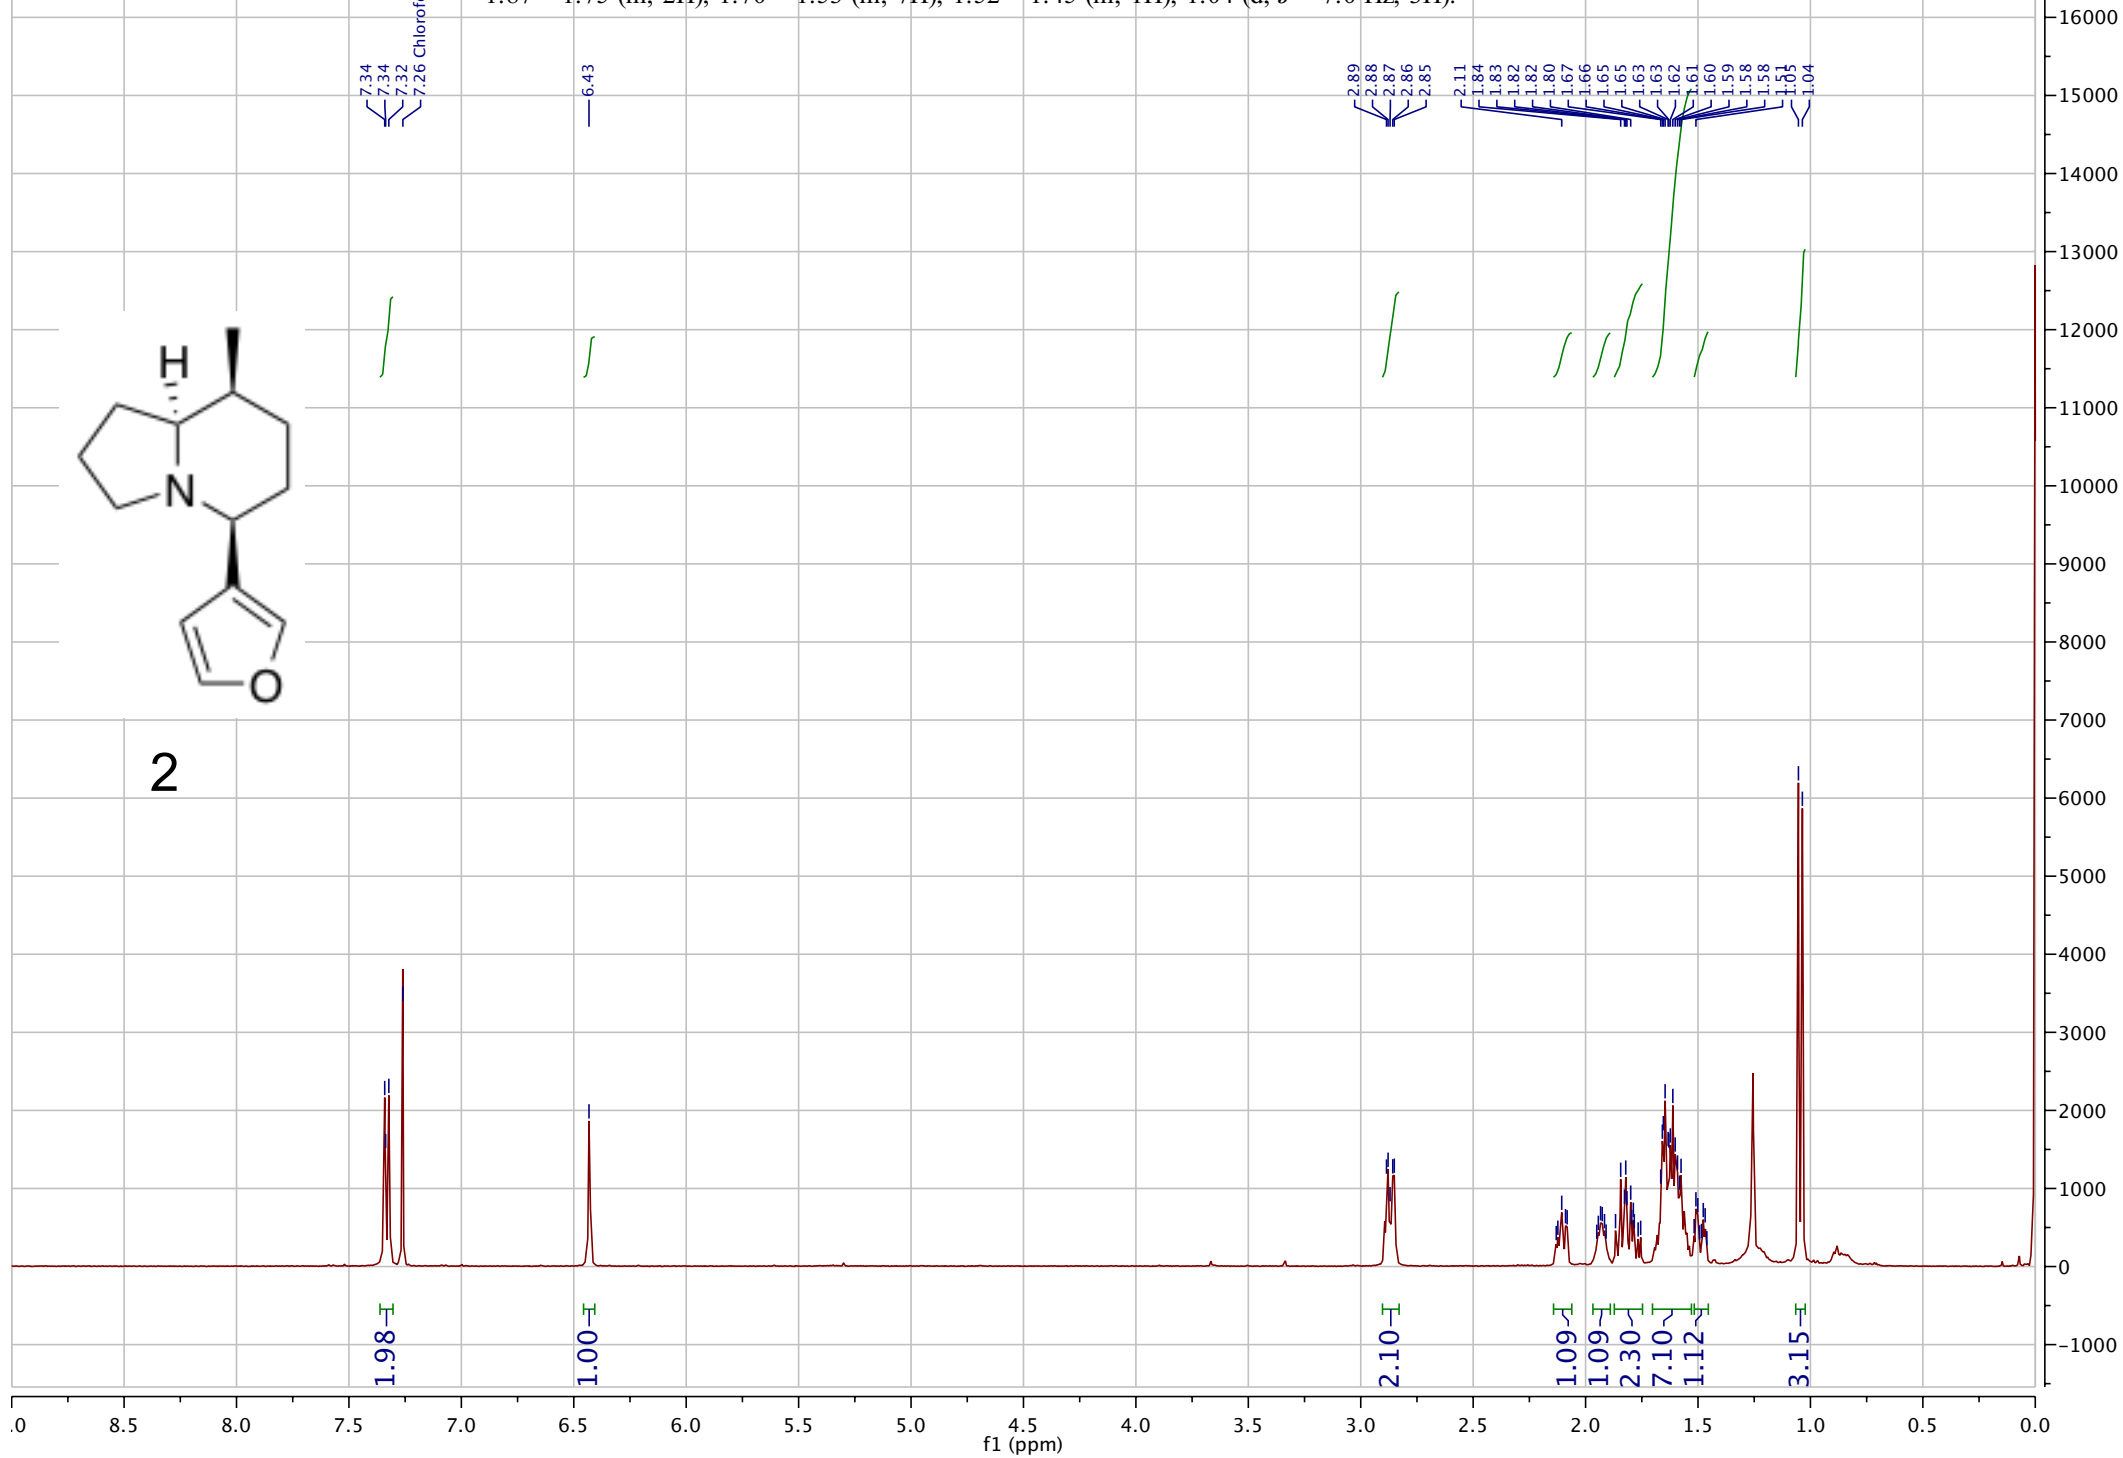

110112  
110112HS-VI-124

$^{13}\text{C}$  NMR (101 MHz,  $\text{CDCl}_3$ )  $\delta$  142.74, 139.21, 128.95, 109.89, 67.69, 61.07, 53.58, 32.34, 29.62, 29.14, 27.04, 20.27, 12.35.

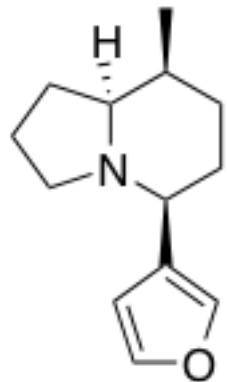

2

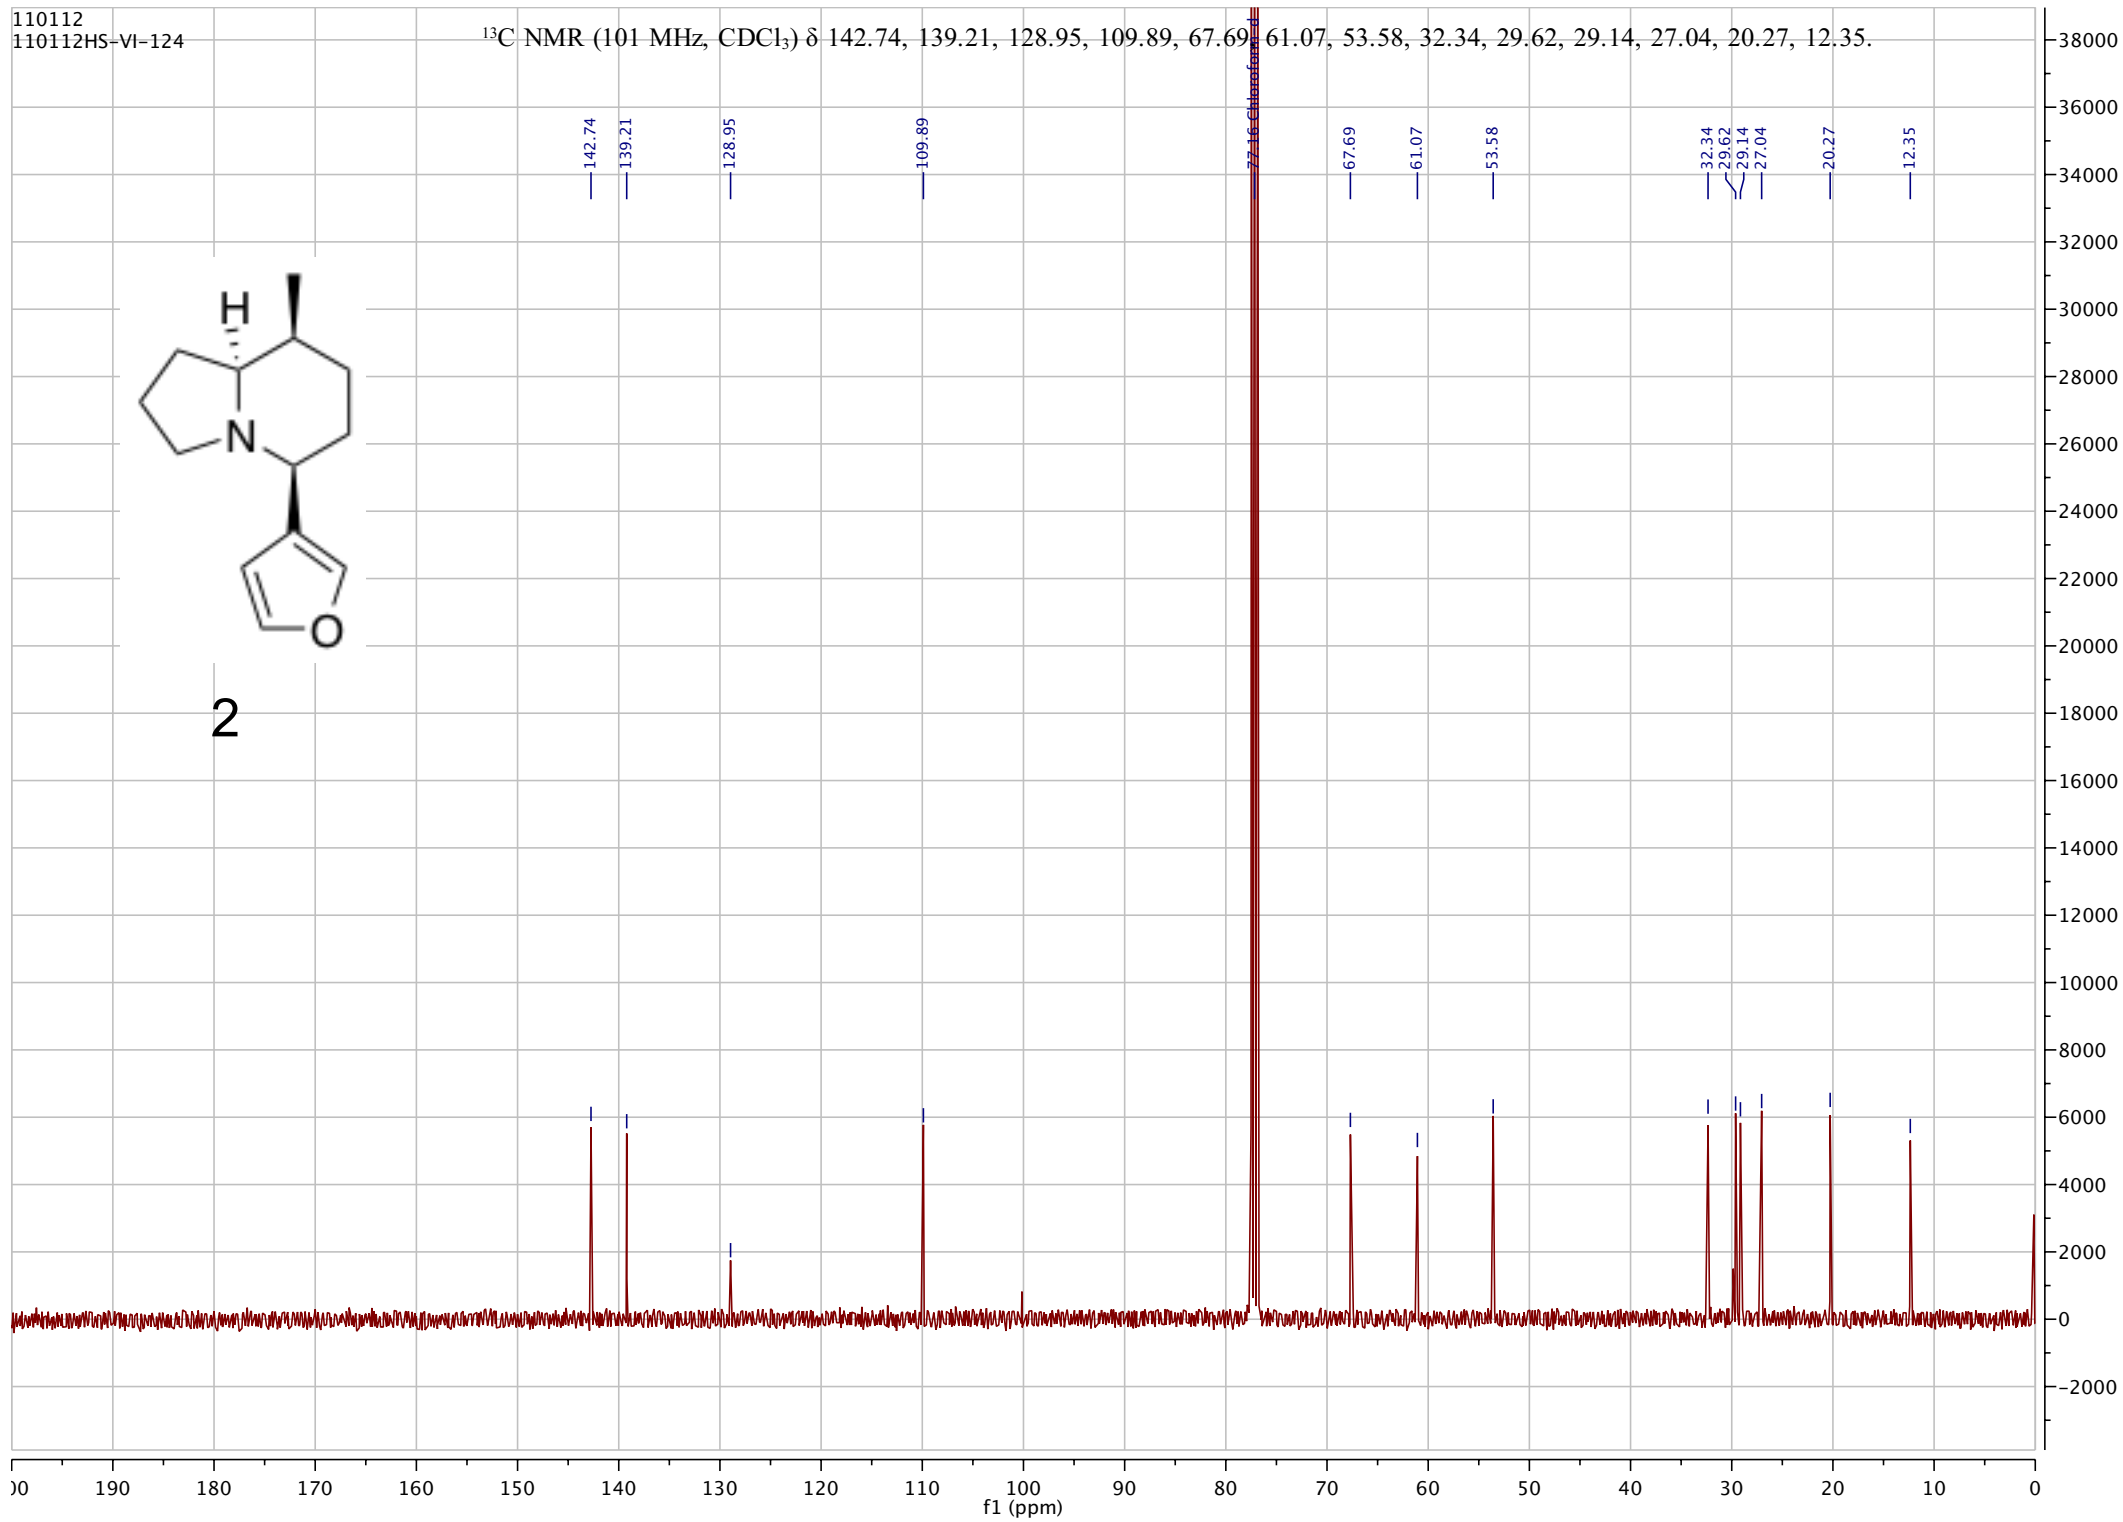

100201  
100201HS-V-102

$^1\text{H NMR}$  (400 MHz,  $\text{CDCl}_3$ )  $\delta$  7.42 – 7.32 (m, 2H), 6.47 (s, 1H), 3.34 (dd,  $J = 11.9, 3.2$  Hz, 1H), 2.94 (dd,  $J = 12.4, 5.4$  Hz, 1H), 2.76 – 2.65 (m, 1H), 2.50 – 2.39 (m, 2H), 2.09 – 1.97 (m, 3H), 1.92 – 1.58 (m, 3H), 1.04 (d,  $J = 6.6$  Hz, 3H).

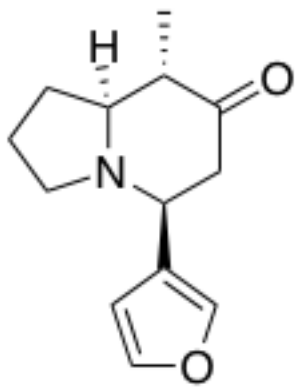

11

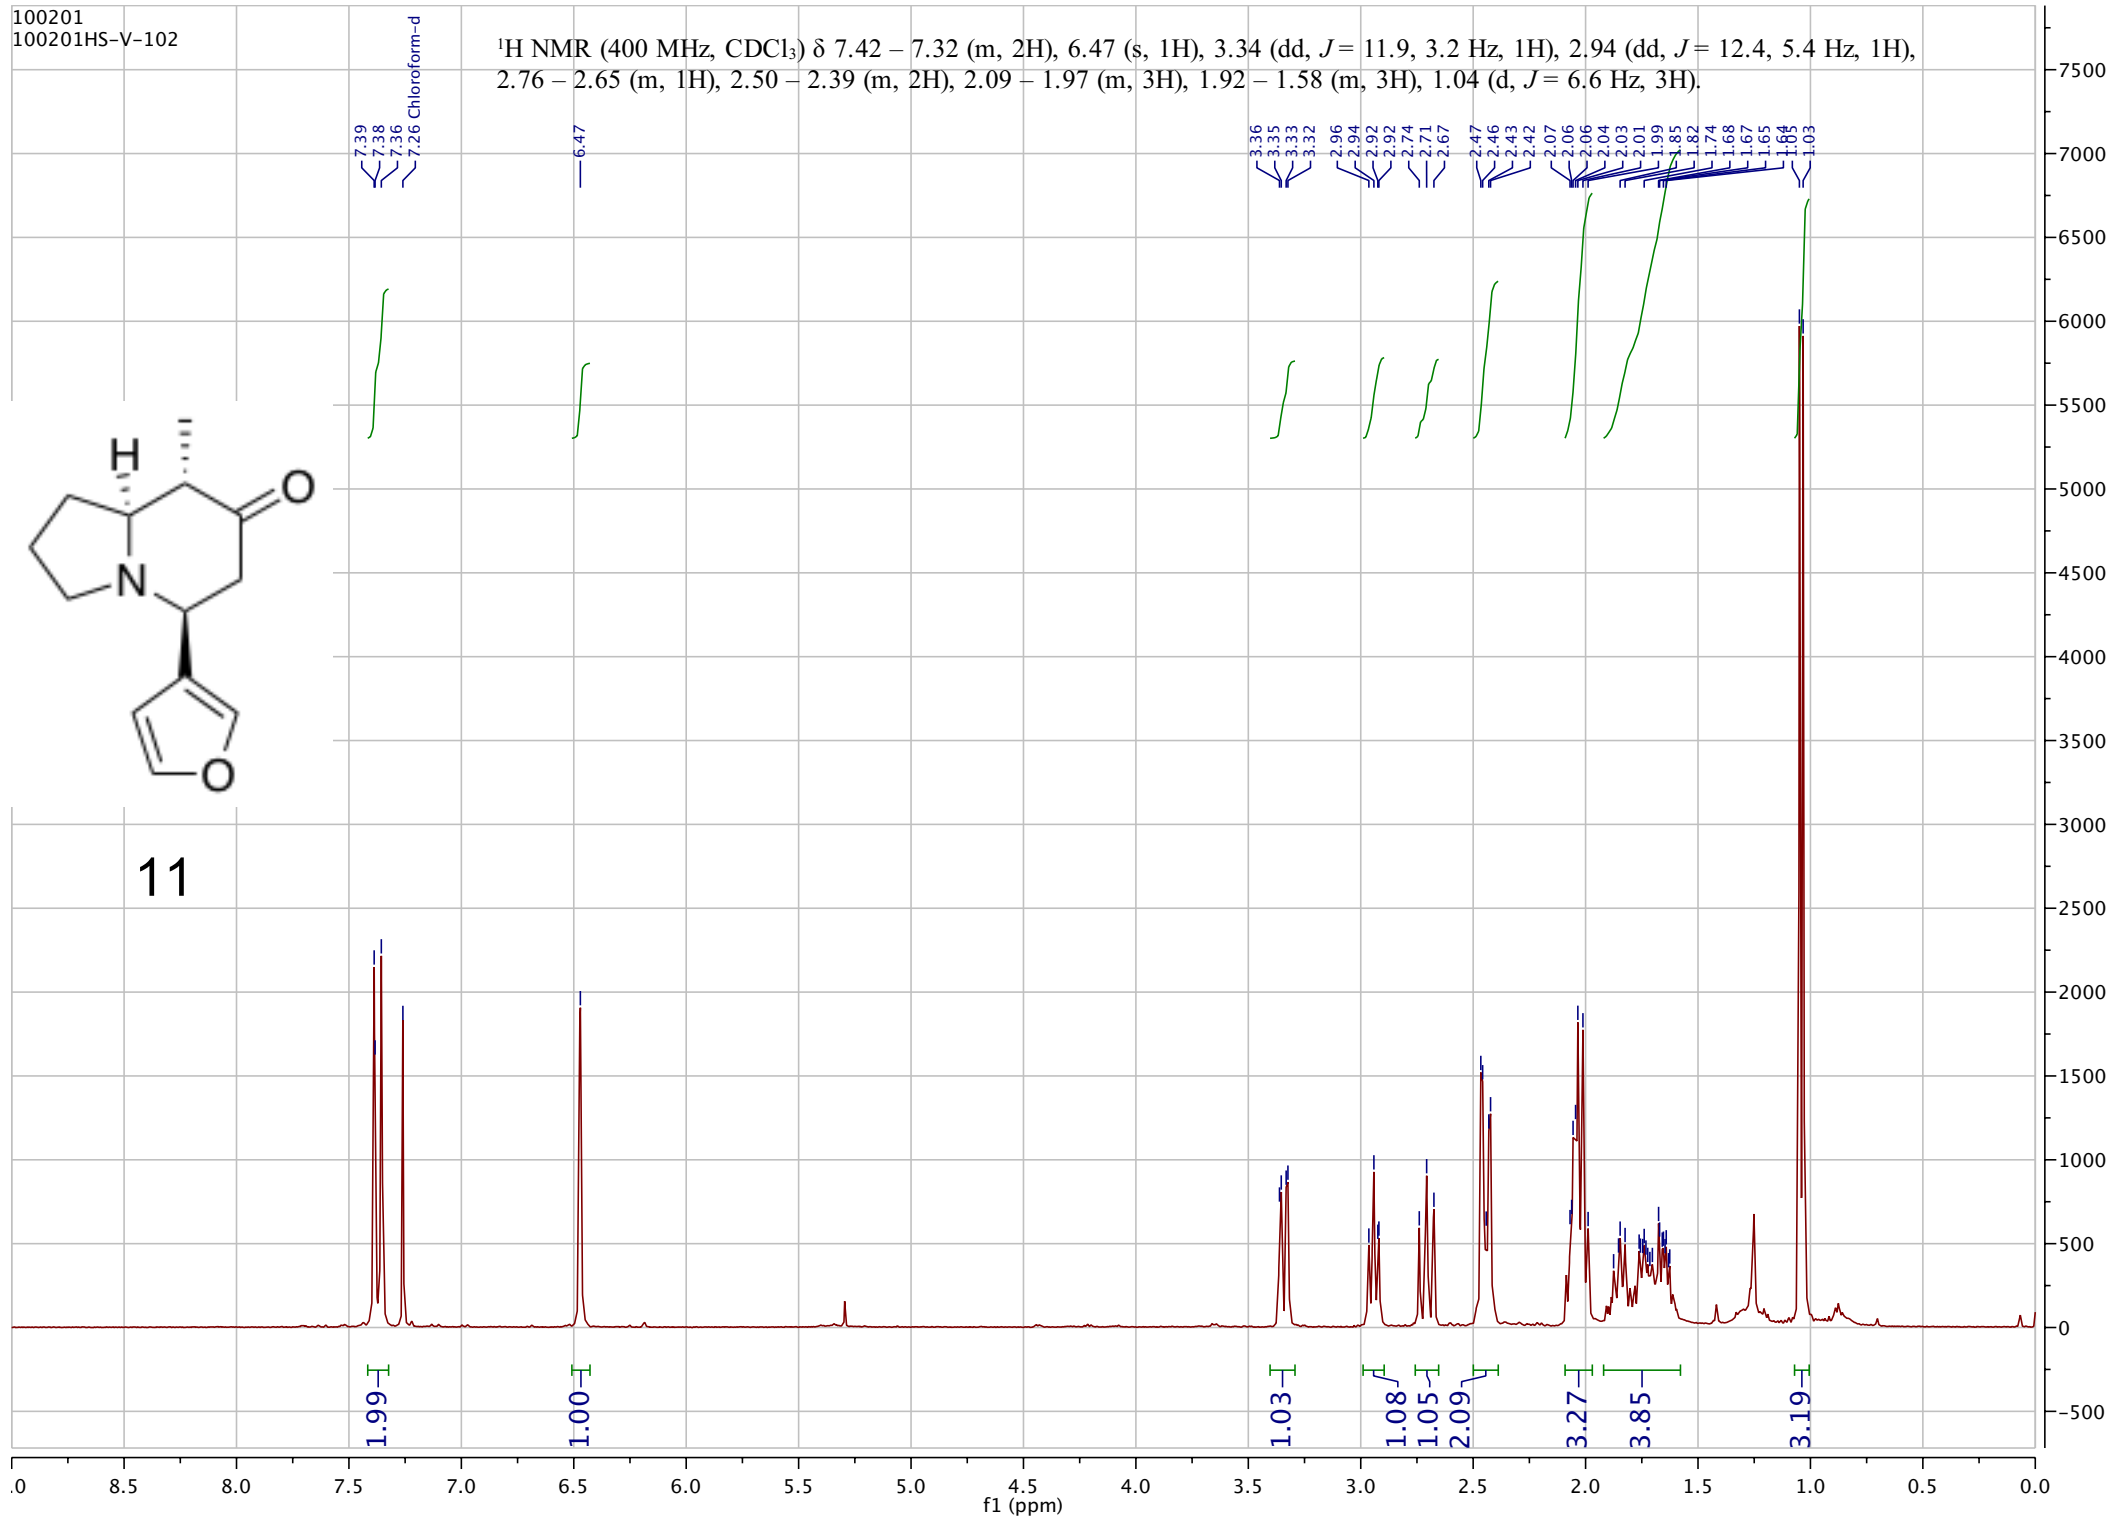





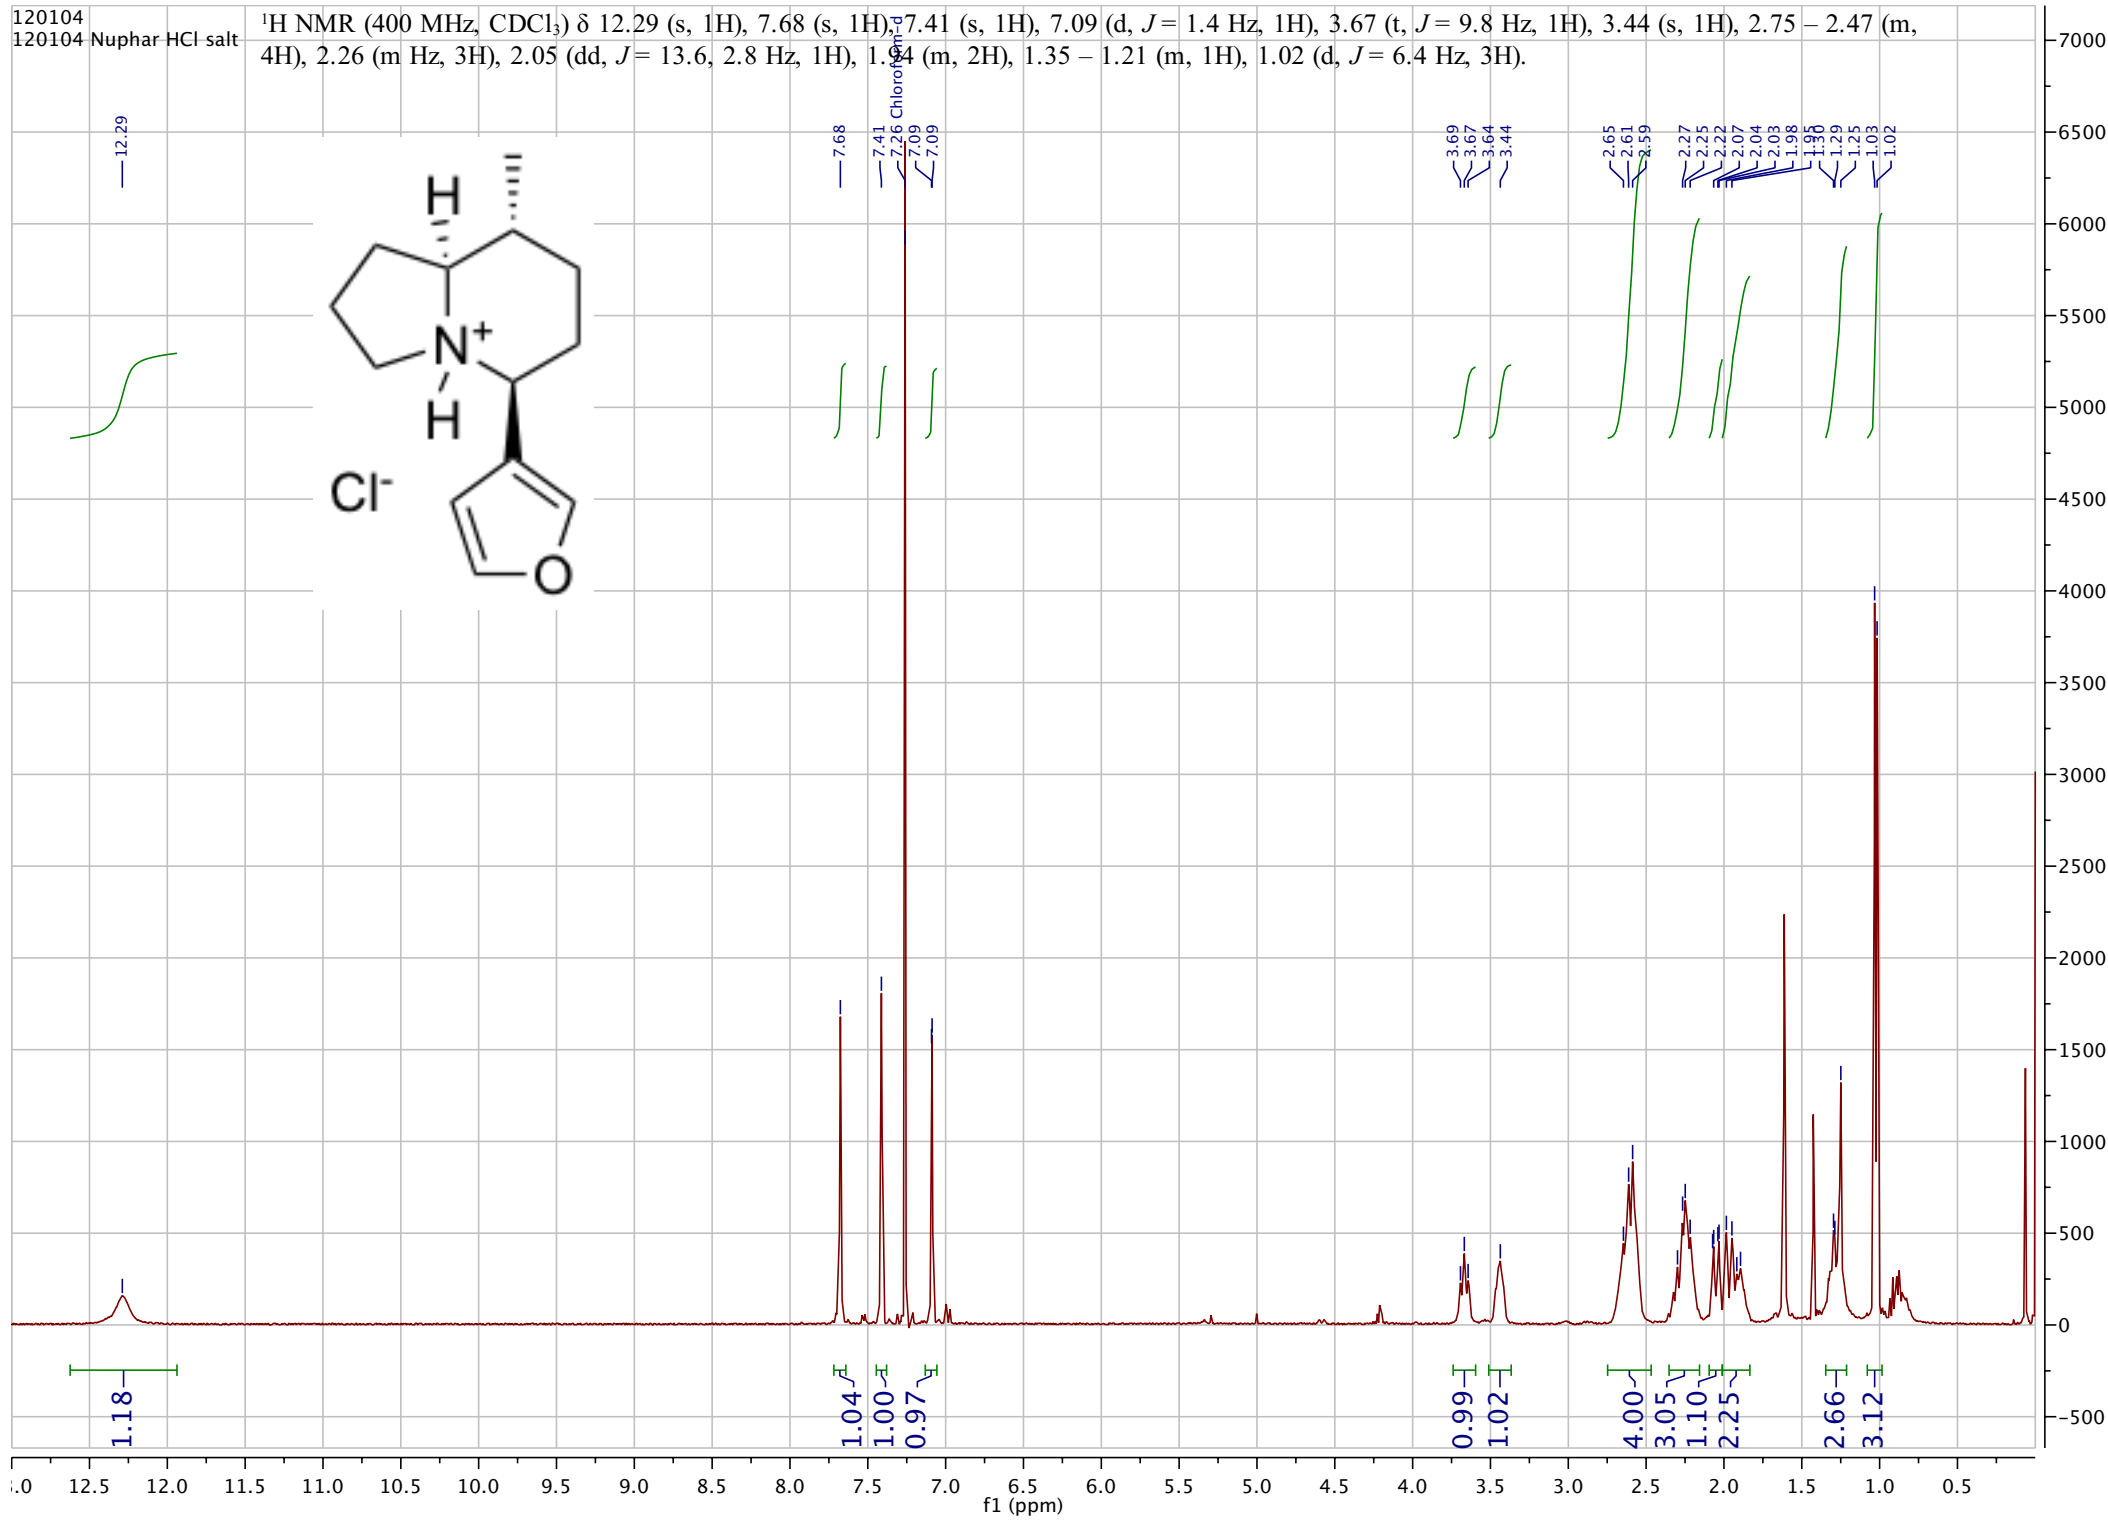

120104  
120104 Nuphar HCl salt

$^{13}\text{C}$  NMR (101 MHz,  $\text{CDCl}_3$ )  $\delta$  144.33, 141.56, 121.11, 110.48, 73.90, 61.62, 51.86, 32.99, 32.85, 31.47, 27.51, 19.22, 18.55, 0.13.

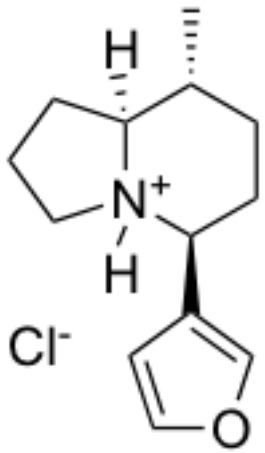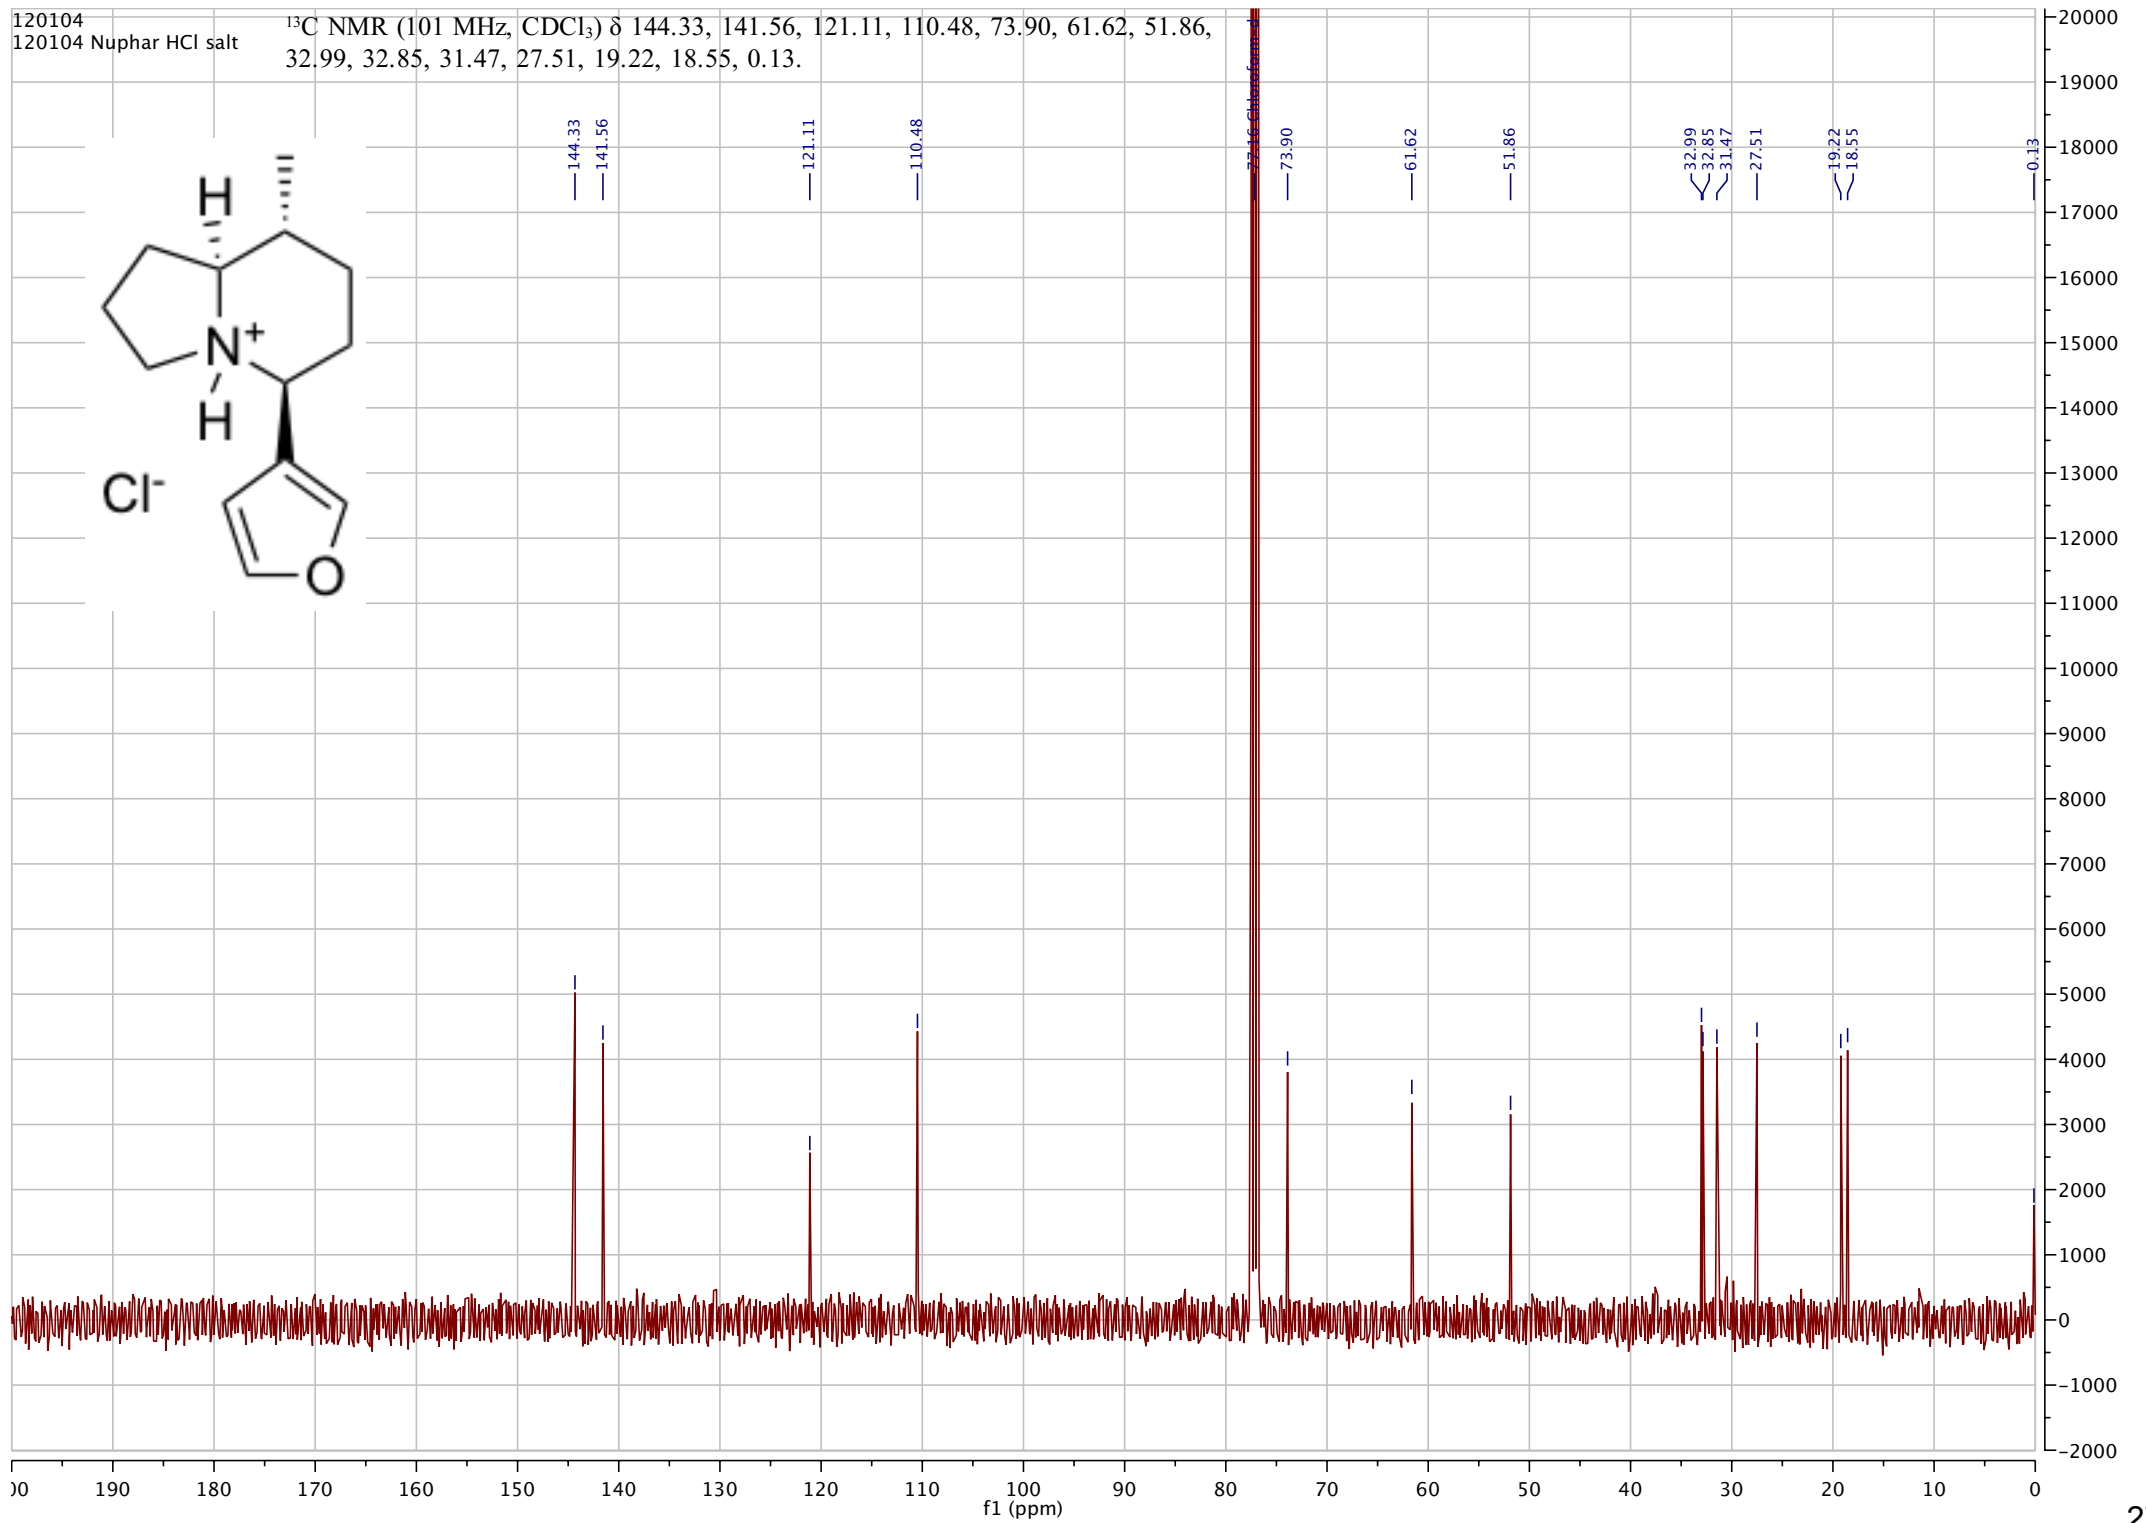

SPEC: e94511ga  
 Samp: HS VI 219  
 Comm: 70 eV LR EI GCMS D85 cap col [50(1)\_15\_320(5)]  
 Mode: EI +VE +LMR BSCAN (EXP) UP LR NRM  
 Oper:  
 Base: 94.0  
 Norm: 94.0  
 Peak: 0.00 mmu

03-May-11 Elapse: 10:25.4  
 Start: 13:39:22  
 1500 res 3339  
 Inlet: 20 > 650  
 Masses: 192  
 #peaks: 192

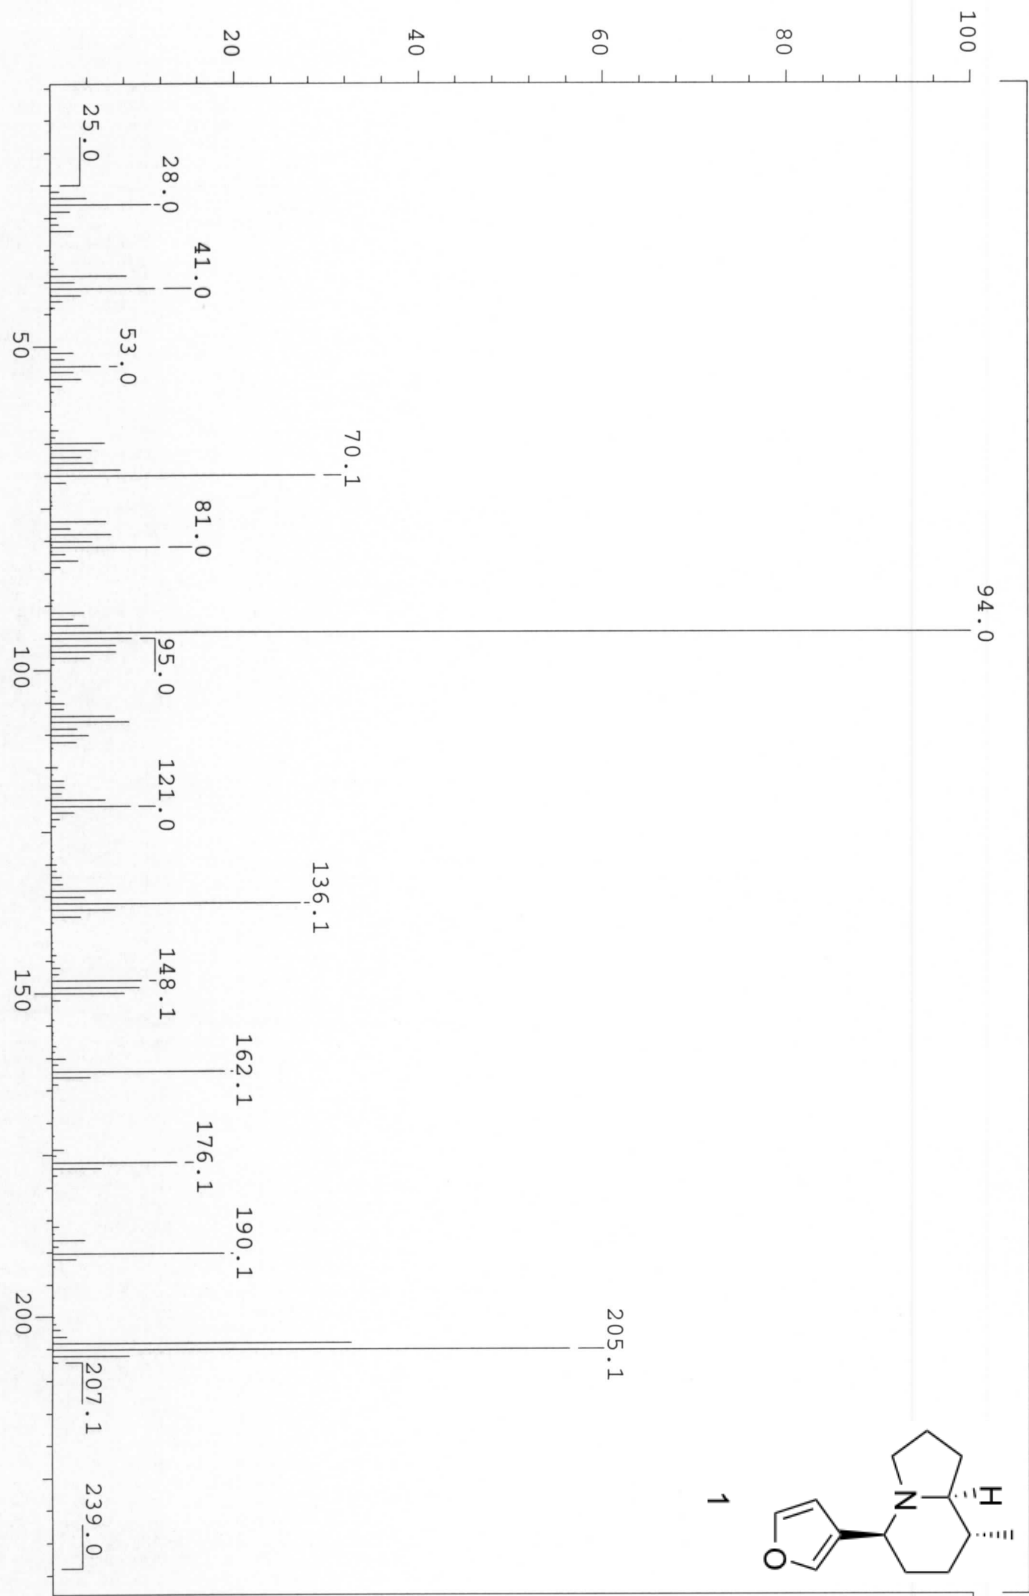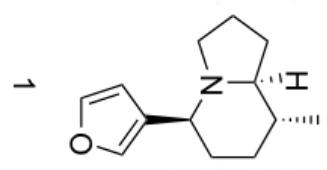

SPEC: e94626g1  
 Samp: HSVI-119  
 Comm: 70 eV LR EI GCMS D85 cap col (50(1))\_15\_320(5) 1  
 Mode: EI +VE +LMR BSCAN (EXP) UP LR NRM  
 Oper: 94.0  
 Base: 94.0  
 Norm: 94.0  
 Peak: 0.00 mmu

18-May-11  
 Elapse: 10:33.9  
 Start: 10:35:15  
 1500 res  
 771  
 1752

Inlet: 20 > 650  
 Masses: 292  
 #peaks: 292

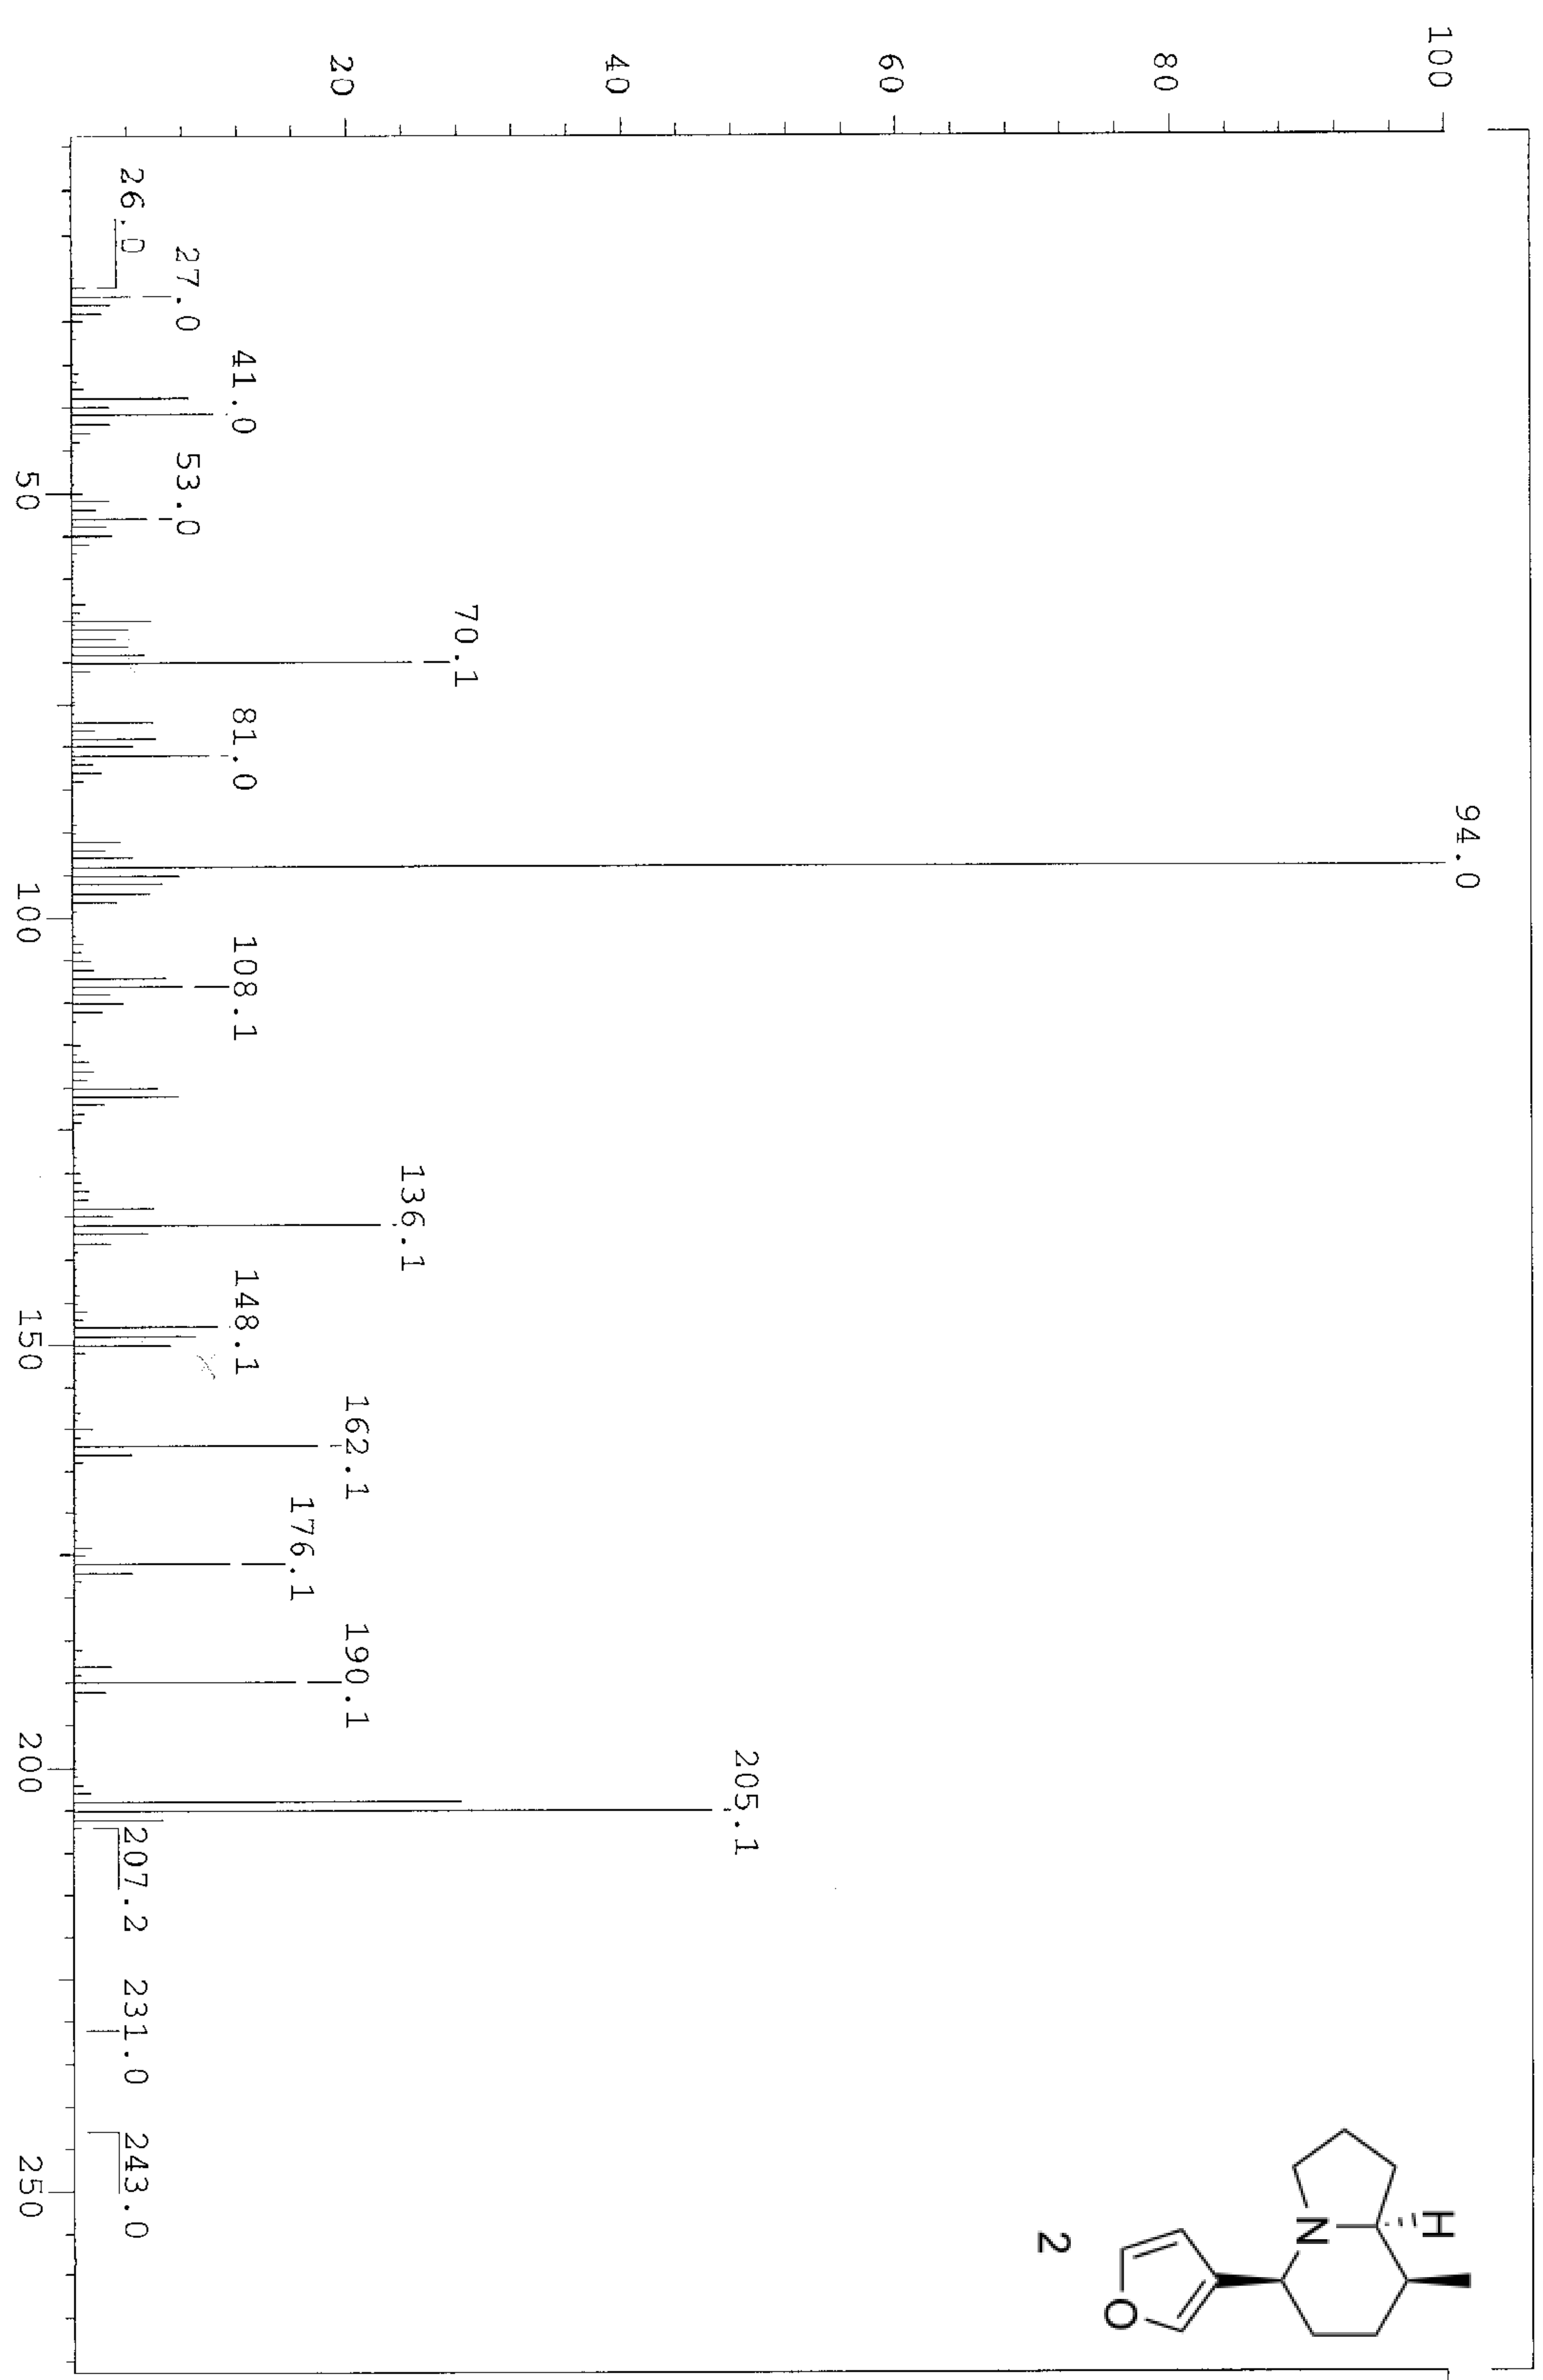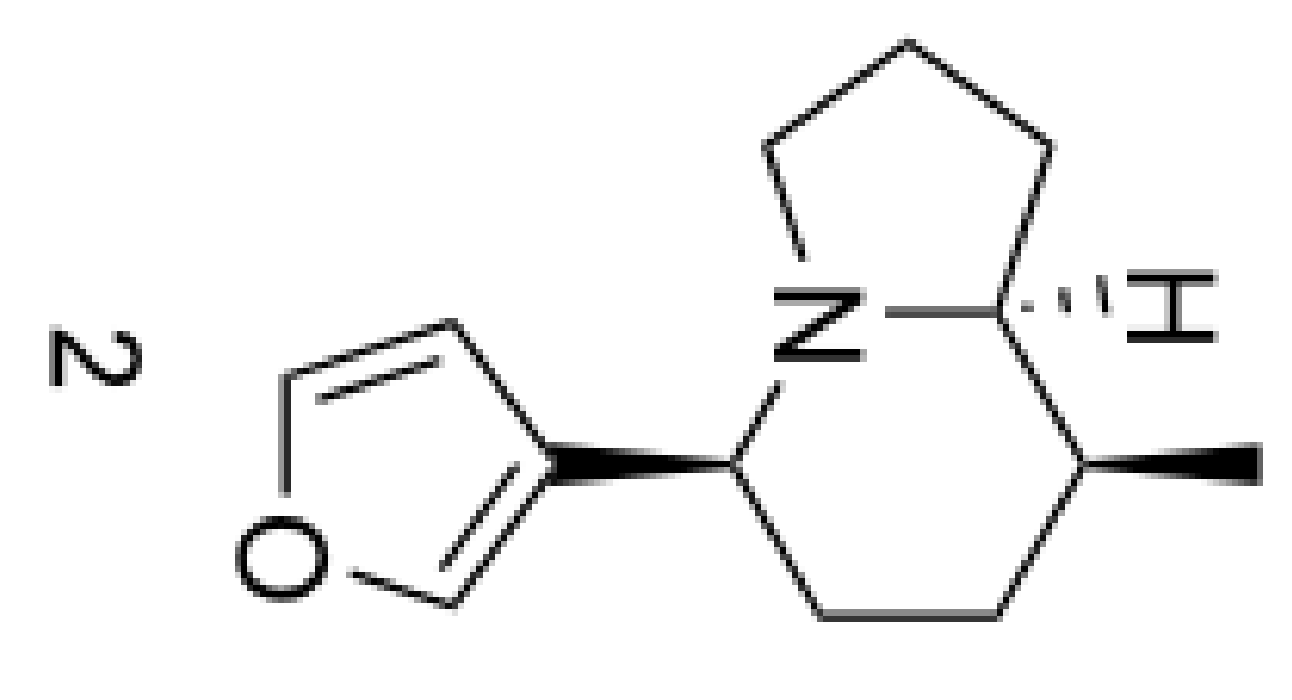

Supplement: NIHMS639805-supplement-Supporting_Information.pdf [file NIHMS639805-supplement-Supporting_Information.pdf]
